# Supplementary material for: Pd-Catalyzed asymmetric hydrogenation of 3-(toluenesulfonamidoalkyl)indoles
Source: Royal Society of Chemistry journal article supplement (doi:10.1039/c1ob06777j), 2011-11-17
Supplement: c1ob06777j.pdf [file c1ob06777j.pdf]

## Supporting Information:

# Pd-Catalyzed Asymmetric Hydrogenation of 3-(Toluenesulfonamidoalkyl)indoles

Ying Duan, Mu-Wang Chen, Qing-An Chen, Chang-Bin Yu, and Yong-Gui Zhou\*

*State Key Laboratory of Catalysis, Dalian Institute of Chemical Physics, Chinese Academy of Sciences, 457 Zhongshan Road, Dalian 116023, P. R. China*

## 1. General and Materials

**General:** All reactions were carried out under an atmosphere of nitrogen using standard schlenk techniques, unless otherwise noted.  $^1\text{H}$  NMR and  $^{13}\text{C}$  NMR spectra were recorded on Bruker DRX-400 spectrometers. The chemical shifts for  $^1\text{H}$  NMR were recorded in ppm downfield from tetramethylsilane (TMS) with the solvent resonance as the internal standard. The chemical shifts for  $^{13}\text{C}$  NMR were recorded in ppm downfield using the central peak of deuteriochloroform (77.23 ppm) as the internal standard. Coupling constants ( $J$ ) are reported in Hz and refer to apparent peak multiplications. TLC analysis was performed using glass-backed plates coated with 0.2 mm silica. Quantitative analysis was performed by  $^1\text{H}$  NMR on Bruker DRX 400 instrument. Flash column chromatography was performed on silica gel (200-300 mesh). Enantiomeric excess was determined by HPLC analysis, using chiral column described below in detail. Optical rotations were measured with JASCO P-1010 polarimeter. The configuration was determined by comparison of rotation sign with the literature data or by analogue.

**Materials:** Commercially available reagents were used throughout without further purification other than those detailed below. Acetone was dried with anhydrous  $\text{CaSO}_4$  and distilled over  $\text{KMnO}_4$ . The solvents for asymmetric hydrogenation reaction were purchased without further purification.

## 2. General Procedure for the Synthesis of 3-(Toluenesulfonamidoalkyl)indoles 1

3-(Toluenesulfonamidoalkyl)indoles **1a-n** were synthesized from the corresponding 2-substituted indoles and *N*-tosyl imines according to the following Method **A** or **B**.<sup>1</sup>

**Method A:** In a dry Schlenk tube, *N*-tosyl imines **4** (1 mmol) and  $(\text{EtO})_2\text{POH}$  (0.1 mmol) were dissolved in toluene (4 mL) under nitrogen. The solution was stirred for 10 minutes at room temperature and then for another 5 minutes at 0 °C. Subsequently, 2-substituted indoles **3** (3 mmol) were added in one portion at 0 °C. The reaction mixture was allowed to warm to room temperature naturally. After the reaction was complete (monitored by TLC), 10%  $\text{NaHCO}_3$  (5 mL) was added to quench the reaction. The mixture was extracted with ethyl acetate (10 mL). The organic layer was washed by brine (10 mL), separated, and dried over anhydrous  $\text{Na}_2\text{SO}_4$ . The solvents were removed

under reduced pressure and the residue was purified by flash chromatography (ethyl acetate/petroleum ether = 1/5) to afford the product.

**Method B:** In a dry Schlenk tube, 2-substituted indoles **3** (1 mmol) and I<sub>2</sub> (10 mol%) was dissolved in 4 mL dry CH<sub>2</sub>Cl<sub>2</sub>. Then the resulting mixture was stirred at 0 °C for 2 min before *N*-tosyl imines **4** (1 mmol) was added. Finally, saturated solution of sodium subsulfite was not added to quench the reaction until the starting materials were consumed as indicated by TLC (about 5 min). The mixture was extracted with CH<sub>2</sub>Cl<sub>2</sub> (10 mL). The organic layer was washed by brine (10 mL), separated, and dried over anhydrous Na<sub>2</sub>SO<sub>4</sub>. The solvents were removed under reduced pressure and the residue was purified by flash chromatography (ethyl acetate/petroleum ether = 1/5) to afford the product.

**4-Methyl-*N*-((2-methyl-1*H*-indol-3-yl)(phenyl)methyl)benzenesulfonamide (1a).**<sup>2,3</sup> <sup>1</sup>H NMR (400 MHz, CDCl<sub>3</sub>) δ 7.70 (s, 1H), 7.46 (d, *J* = 8.0 Hz, 2H), 7.39 (d, *J* = 7.4 Hz, 2H), 7.29-7.11 (m, 4H), 7.03 (m, 4H), 6.88 (t, *J* = 7.3 Hz, 1H), 5.82 (d, *J* = 6.8 Hz, 1H), 5.14 (d, *J* = 7.3 Hz, 1H), 2.31 (s, 3H), 2.12 (s, 3H); IR (KBr) ν 3363, 3293, 1493, 1318, 1158, 745, 698, 556 cm<sup>-1</sup>.

***N*-(Cyclohexyl(2-methyl-1*H*-indol-3-yl)methyl)-4-methylbenzenesulfonamide (1b).** White solid, m.p. 94-95 °C; <sup>1</sup>H NMR (400 MHz, d<sup>6</sup>-Acetone) δ 9.61 (s, 1H), 7.58 (d, *J* = 7.9 Hz, 1H), 7.22 (d, *J* = 8.0 Hz, 2H), 7.08 (d, *J* = 8.0 Hz, 1H), 6.92 (t, *J* = 7.5 Hz, 1H), 6.82 (dd, *J* = 18.3, 7.6 Hz, 4H), 6.53 (d, *J* = 8.3 Hz, 1H), 4.29 (t, *J* = 9.2 Hz, 1H), 2.34-2.25 (m, 1H), 2.24 (s, 3H), 2.16 (s, 3H), 2.08-1.97 (m, 1H), 1.76 (dd, *J* = 9.2, 4.8 Hz, 1H), 1.56 (dd, *J* = 19.4, 11.5 Hz, 2H), 1.42-0.95 (m, 6H), 0.87-0.77 (m, 1H). <sup>13</sup>C NMR (100 MHz, d<sup>6</sup>-Acetone) δ 142.03, 136.75, 133.63, 128.83, 127.24, 126.80, 120.95, 119.64, 119.17, 111.04, 110.71, 57.46, 42.54, 31.85, 30.93, 27.11, 26.81, 26.66, 21.24, 11.79. HRMS Calculated for C<sub>24</sub>H<sub>30</sub>N<sub>2</sub>O<sub>2</sub>NaS [M+Na]<sup>+</sup> 419.1769, found 419.1769; IR (KBr) ν 3386, 2924, 2857, 1307, 1156, 670 cm<sup>-1</sup>.

***N*-((4-Fluorophenyl)(2-methyl-1*H*-indol-3-yl)methyl)-4-methylbenzenesulfonamide (1c).** White solid, m.p. 156-157 °C; <sup>1</sup>H NMR (400 MHz, d<sup>6</sup>-Acetone) δ 9.89 (s, 1H), 7.55 (d, *J* = 8.1 Hz, 2H), 7.44 (dd, *J* = 8.2, 5.7 Hz, 2H), 7.17 (d, *J* = 8.1 Hz, 1H), 7.09 (t, *J* = 7.2 Hz, 3H), 7.06-6.87 (m, 4H), 6.77 (t, *J* = 7.5 Hz, 1H), 5.84 (d, *J* = 7.3 Hz, 1H), 2.31 (s, 3H), 2.14 (s, 3H). <sup>13</sup>C NMR (100 MHz, d<sup>6</sup>-Acetone) δ 163.69, 161.27, 143.18, 139.51, 138.93 (d, *J* = 3.1 Hz), 136.63, 134.06, 129.86, 129.78, 129.67, 127.58, 127.31, 121.39, 119.53 (d, *J* = 4.0 Hz), 115.37, 115.16, 111.19, 53.89, 21.32, 11.60; HRMS Calculated for C<sub>23</sub>H<sub>21</sub>FN<sub>2</sub>O<sub>2</sub>NaS [M+Na]<sup>+</sup> 431.1205, found 431.1204; IR (KBr) ν 3366, 3305, 1507, 1460, 1318, 1160, 750, 668, 550 cm<sup>-1</sup>.

**4-Methyl-*N*-((2-methyl-1*H*-indol-3-yl)(*p*-tolyl)methyl)benzenesulfonamide (1d).** White solid, m.p. 154-155 °C; <sup>1</sup>H NMR (400 MHz, d<sup>6</sup>-Acetone) δ 9.82 (s, 1H), 7.52 (d, *J* = 7.8 Hz, 2H), 7.15 (d, *J* = 4.7 Hz, 2H), 7.15 (d, *J* = 7.5 Hz, 2H), 7.06 (t, *J* = 7.8 Hz, 4H), 6.95-6.91 (m, 2H), 6.76 (t, *J* = 7.6 Hz, 1H), 5.83 (d, *J* = 7.4 Hz, 1H), 2.29 (s, 3H), 2.25 (s, 3H), 2.16 (s, 3H). <sup>13</sup>C NMR (100 MHz, d<sup>6</sup>-Acetone) δ 142.98, 139.81, 136.80, 136.64, 133.85, 129.56, 129.36, 127.86, 127.51, 121.27, 119.75, 119.38, 111.58, 111.11, 54.27, 21.32, 20.99, 11.68; HRMS Calculated for C<sub>24</sub>H<sub>24</sub>N<sub>2</sub>O<sub>2</sub>NaS [M+Na]<sup>+</sup> 427.1456, found 427.1447; IR (KBr) ν 3396, 1460, 1325, 1155, 747, 673, 562 cm<sup>-1</sup>.

**4-Methyl-*N*-((2-methyl-1*H*-indol-3-yl)(*m*-tolyl)methyl)benzenesulfonamide (1e).** Pale yellow solid, m.p. 168-169 °C; <sup>1</sup>H NMR (400 MHz, d<sup>6</sup>-Acetone) δ 9.84 (s, 1H), 7.53 (d, *J* = 8.1 Hz, 2H), 7.21-7.07 (m, 7H), 6.99-6.91 (m, 3H), 6.76 (t, *J* = 7.5 Hz, 1H), 5.85 (d, *J* = 7.5 Hz, 1H), 2.30 (s, 3H), 2.21 (s, 3H), 2.17 (s, 3H). <sup>13</sup>C NMR (100 MHz, d<sup>6</sup>-Acetone) δ 142.99, 142.68, 139.75, 138.04, 136.59, 133.86, 129.58, 128.63, 128.51, 128.08, 127.52, 125.04, 121.27, 119.68, 119.40, 111.59, 111.10, 110.86, 54.47, 21.48, 21.32, 11.71; HRMS Calculated for C<sub>24</sub>H<sub>24</sub>N<sub>2</sub>O<sub>2</sub>NaS [M+Na]<sup>+</sup> 427.1456, found 427.1459; IR (KBr) ν 3375, 1460, 1315, 1160, 1093, 1152, 743, 668, 560 cm<sup>-1</sup>.

**4-Methyl-N-((2-methyl-1H-indol-3-yl)(*o*-tolyl)methyl)benzenesulfonamide (1f).** White solid, m.p. 165-166 °C; <sup>1</sup>H NMR (400 MHz, d<sup>6</sup>-Acetone) δ 9.88 (s, 1H), 7.78 (d, *J* = 8.3 Hz, 2H), 7.56 (d, *J* = 8.2 Hz, 2H), 7.35 (d, *J* = 8.0 Hz, 1H), 7.22-7.01 (m, 4H), 6.99-6.86 (m, 2H), 6.83-6.68 (m, 1H), 6.50 (s, 1H), 5.94 (d, *J* = 6.9 Hz, 1H), 2.32 (s, 3H), 2.13 (s, 3H), 2.05 (s, 3H); <sup>13</sup>C NMR (100 MHz, d<sup>6</sup>-Acetone) δ 143.24, 143.11, 142.40, 140.34, 139.70, 136.31, 134.19, 131.10, 130.17, 129.68, 128.24, 128.10, 127.64, 127.62, 127.53, 126.90, 125.99, 121.21, 119.48, 119.39, 111.07, 110.83, 109.81, 52.60, 52.50, 21.33, 21.31, 19.44, 11.83; HRMS Calculated for C<sub>24</sub>H<sub>24</sub>N<sub>2</sub>O<sub>2</sub>NaS [M+Na]<sup>+</sup> 427.1456, found 427.1458; IR (KBr) ν 3389, 1461, 1319, 1158, 1093, 1046, 740, 672, 563 cm<sup>-1</sup>.

**N-((2-Butyl-1H-indol-3-yl)(phenyl)methyl)-4-methylbenzenesulfonamide (1g).** White solid, m.p. 148-149 °C; <sup>1</sup>H NMR (400 MHz, d<sup>6</sup>-Acetone) δ 9.90 (s, 1H), 7.58 (d, *J* = 7.3 Hz, 2H), 7.44 (d, *J* = 7.5 Hz, 2H), 7.24 (t, *J* = 7.4 Hz, 2H), 7.21-7.07 (m, 5H), 7.05-6.87 (m, 2H), 6.75 (dd, *J* = 7.9, 7.2 Hz, 1H), 5.87 (d, *J* = 6.9 Hz, 1H), 2.56-2.49 (m, 2H), 2.32 (s, 3H), 1.54-1.46 (m, 2H), 1.30-1.24 (m, 2H), 0.85 (t, *J* = 7.3 Hz, 3H); <sup>13</sup>C NMR (100 MHz, d<sup>6</sup>-Acetone) δ 143.11, 143.04, 139.66, 138.50, 136.79, 129.70, 128.67, 127.97, 127.66, 127.38, 127.30, 121.36, 120.01, 119.39, 111.25, 111.09, 54.44, 32.59, 26.37, 23.25, 21.35, 14.11; HRMS Calculated for C<sub>26</sub>H<sub>28</sub>N<sub>2</sub>O<sub>2</sub>NaS [M+Na]<sup>+</sup> 455.1769, found 455.1768; IR (KBr) ν 3405, 2956, 1493, 1324, 1160, 742, 668, 560 cm<sup>-1</sup>.

**4-Methyl-N-((2-phenethyl-1H-indol-3-yl)(phenyl)methyl)benzenesulfonamide (1h).** White solid, m.p. 175-176 °C; <sup>1</sup>H NMR (400 MHz, d<sup>6</sup>-Acetone) δ 10.01 (s, 1H), 7.58 (d, *J* = 8.2 Hz, 2H), 7.31 (d, *J* = 7.6 Hz, 2H), 7.14-7.27 (m, 9H), 7.09 (dd, *J* = 8.0, 2.9 Hz, 3H), 6.94 (dd, *J* = 11.0, 4.0 Hz, 2H), 6.83-6.69 (m, 1H), 5.87 (d, *J* = 7.1 Hz, 1H), 2.87-2.80 (m, 4H), 2.25 (s, 3H); <sup>13</sup>C NMR (100 MHz, d<sup>6</sup>-Acetone) δ 143.20, 142.85, 142.22, 139.67, 137.50, 136.85, 129.77, 129.21, 128.64, 127.94, 127.67, 127.31, 126.86, 121.57, 120.05, 119.46, 111.81, 111.30, 54.34, 36.56, 28.92, 21.31; HRMS Calculated for C<sub>30</sub>H<sub>28</sub>N<sub>2</sub>O<sub>2</sub>NaS [M+Na]<sup>+</sup> 503.1769, found 503.1760; IR (KBr) ν 3375, 1451, 1324, 1163, 743, 697, 669, 560 cm<sup>-1</sup>.

**N-((2,7-Dimethyl-1H-indol-3-yl)(phenyl)methyl)-4-methylbenzenesulfonamide (1i).** White solid, m.p. 144-145 °C; <sup>1</sup>H NMR (400 MHz, d<sup>6</sup>-Acetone) δ 9.74 (s, 1H), 7.50 (d, *J* = 7.9 Hz, 2H), 7.42 (d, *J* = 7.6 Hz, 2H), 7.24 (t, *J* = 7.4 Hz, 2H), 7.17 (t, *J* = 7.3 Hz, 1H), 7.05 (d, *J* = 8.0 Hz, 2H), 6.96 (t, *J* = 9.4 Hz, 2H), 6.74 (d, *J* = 7.0 Hz, 1H), 6.67 (t, *J* = 7.5 Hz, 1H), 5.86 (d, *J* = 7.4 Hz, 1H), 2.37 (s, 3H), 2.29 (s, 3H), 2.17 (s, 3H); <sup>13</sup>C NMR (100 MHz, d<sup>6</sup>-Acetone) δ 142.87, 142.82, 135.96, 133.77, 129.44, 128.70, 127.95, 127.45, 127.41, 127.04, 122.02, 120.24, 119.70, 117.46, 111.81, 54.54, 21.29, 16.82, 11.62; HRMS Calculated for C<sub>24</sub>H<sub>24</sub>N<sub>2</sub>O<sub>2</sub>NaS [M+Na]<sup>+</sup> 427.1456, found 427.1459; IR (KBr) ν 3395, 3275, 1453, 1318, 1153, 670, 560 cm<sup>-1</sup>.

**N-(Cyclohexyl(2,7-dimethyl-1H-indol-3-yl)methyl)-4-methylbenzenesulfonamide (1j).** White solid, m.p. 156-157 °C; <sup>1</sup>H NMR (400 MHz, d<sup>6</sup>-Acetone) δ 9.49 (s, 1H), 7.41 (d, *J* = 7.1 Hz, 1H), 7.17 (d, *J* = 7.4 Hz, 2H), 6.76-6.71 (m, 4H), 6.52 (d, *J* = 8.4 Hz, 1H), 4.27 (t, *J* = 9.1 Hz, 1H), 2.33-2.25 (m, 7H), 2.14 (s, 3H), 1.77 (d, *J* = 13.2 Hz, 1H), 1.61-1.53 (m, 2H), 1.31-1.03 (m, 5H), 0.87-0.77 (m, 2H); <sup>13</sup>C NMR (100 MHz, d<sup>6</sup>-Acetone) δ 141.73, 139.87, 135.98, 133.44, 128.53, 126.63, 121.68, 120.00, 119.43, 117.42, 111.06, 57.55, 42.38, 31.87, 30.93, 27.11, 26.80, 26.64, 21.15, 16.87, 11.73; HRMS Calculated for C<sub>24</sub>H<sub>30</sub>N<sub>2</sub>O<sub>2</sub>NaS [M+Na]<sup>+</sup> 433.1926, found 433.1938; IR (KBr) ν 3384, 2924, 2853, 1452, 1303, 1154, 667, 559 cm<sup>-1</sup>.

**N-(1-(2,7-dimethyl-1H-indol-3-yl)-2-methylpropyl)-4-methylbenzenesulfonamide (1k).** White solid, m.p. 166-167 °C; <sup>1</sup>H NMR (400 MHz, d<sup>6</sup>-Acetone) δ 9.47 (s, 1H), 7.41 (d, *J* = 7.0 Hz, 1H), 7.18 (d, *J* = 8.2 Hz, 2H), 6.76-6.71 (m, 4H), 6.54 (d, *J* = 8.5 Hz, 1H), 4.18 (dd, *J* = 9.9, 8.7 Hz, 1H), 2.43-2.34 (m, 1H), 2.33 (s, 3H),

2.27 (s, 3H), 2.14 (s, 3H), 1.16 (d,  $J=6.5$ , 3H), 0.69 (d,  $J=6.7$ , 3H);  $^{13}\text{C}$  NMR (100 MHz,  $\text{d}^6\text{-Acetone}$ )  $\delta$  141.76, 139.73, 135.95, 133.37, 128.53, 126.63, 121.68, 120.00, 119.42, 117.39, 111.41, 58.99, 21.14, 21.09, 20.42, 16.84, 11.70; HRMS Calculated for  $\text{C}_{21}\text{H}_{26}\text{N}_2\text{O}_2\text{NaS}$   $[\text{M}+\text{Na}]^+$  393.1613, found 393.1619; IR (KBr)  $\nu$  3421, 3352, 1460, 1158, 1098, 1023, 664, 572  $\text{cm}^{-1}$ .

***N*-((2,7-Dimethyl-1*H*-indol-3-yl)(*p*-tolyl)methyl)-4-methylbenzenesulfonamide (1l).** yellow solid, m.p. 153-154  $^{\circ}\text{C}$ ;  $^1\text{H}$  NMR (400 MHz,  $\text{d}^6\text{-Acetone}$ )  $\delta$  9.72 (s, 1H), 7.48 (d,  $J = 7.9$  Hz, 2H), 7.29 (d,  $J = 7.6$  Hz, 2H), 7.11-6.95 (m, 5H), 6.90 (d,  $J = 7.4$  Hz, 1H), 6.74 (d,  $J = 7.1$  Hz, 1H), 6.69 (d,  $J = 7.7$  Hz, 1H), 5.82 (d,  $J = 7.6$  Hz, 1H), 2.37 (s, 3H), 2.28 (s, 3H), 2.26 (s, 3H), 2.18 (s, 3H);  $^{13}\text{C}$  NMR (100 MHz,  $\text{d}^6\text{-Acetone}$ )  $\delta$  142.79, 139.76, 136.79, 135.96, 133.67, 129.38, 129.35, 127.90, 127.39, 127.05, 121.97, 120.20, 119.65, 117.55, 111.88, 54.35, 54.25, 21.30, 20.98, 16.84, 11.64; HRMS Calculated for  $\text{C}_{25}\text{H}_{26}\text{N}_2\text{O}_2\text{NaS}$   $[\text{M}+\text{Na}]^+$  441.1613, found 441.1599; IR (KBr)  $\nu$  3371, 1321, 1156, 810, 669, 558  $\text{cm}^{-1}$ .

***N*-((2,7-Dimethyl-1*H*-indol-3-yl)(*m*-tolyl)methyl)-4-methylbenzenesulfonamide (1m).** Yellow solid, m.p. 156-158  $^{\circ}\text{C}$ ;  $^1\text{H}$  NMR (400 MHz,  $\text{d}^6\text{-Acetone}$ )  $\delta$  9.73 (s, 1H), 7.49 (d,  $J = 8.0$  Hz, 2H), 7.20 (d,  $J = 12.5$  Hz, 2H), 7.11 (t,  $J = 7.6$  Hz, 1H), 7.07-6.95 (m, 4H), 6.92 (d,  $J = 7.5$  Hz, 1H), 6.74 (d,  $J = 6.9$  Hz, 1H), 6.68 (t,  $J = 7.5$  Hz, 1H), 5.84 (d,  $J = 7.5$  Hz, 1H), 2.36 (s, 3H), 2.28 (s, 3H), 2.21 (s, 3H), 2.19 (s, 3H);  $^{13}\text{C}$  NMR (100 MHz,  $\text{d}^6\text{-Acetone}$ )  $\delta$  142.80, 142.64, 139.69, 138.02, 135.91, 133.67, 129.39, 128.61, 128.53, 128.07, 127.40, 127.07, 125.06, 121.98, 120.19, 119.67, 117.47, 111.89, 54.54, 21.48, 21.28, 16.82, 11.66; HRMS Calculated for  $\text{C}_{25}\text{H}_{26}\text{N}_2\text{O}_2\text{NaS}$   $[\text{M}+\text{Na}]^+$  411.1613, found 411.1603; IR (KBr)  $\nu$  3372, 1319, 1155, 669, 562  $\text{cm}^{-1}$ .

***N*-((2,7-Dimethyl-1*H*-indol-3-yl)(*o*-tolyl)methyl)-4-methylbenzenesulfonamide (1n).** White solid, m.p. 159-161  $^{\circ}\text{C}$ ;  $^1\text{H}$  NMR (400 MHz,  $\text{d}^6\text{-Acetone}$ )  $\delta$  9.77 (s, 1H), 7.77 (d,  $J = 2.9$  Hz, 1H), 7.53 (d,  $J = 7.9$  Hz, 2H), 7.16-7.03 (m, 5H), 6.99 (d,  $J = 7.3$  Hz, 1H), 6.89 (d,  $J = 6.3$  Hz, 1H), 6.74 (d,  $J = 7.1$  Hz, 1H), 6.68 (dd,  $J = 10.5, 4.4$  Hz, 1H), 5.98-5.89 (m, 1H), 2.36 (s, 3H), 2.31 (s, 3H), 2.16 (s, 3H), 2.08 (s, 3H);  $^{13}\text{C}$  NMR (100 MHz,  $\text{d}^6\text{-Acetone}$ )  $\delta$  142.97, 140.33, 139.69, 136.45, 135.66, 133.99, 131.13, 129.54, 128.36, 127.73, 127.56, 126.00, 121.96, 120.17, 119.79, 117.25, 110.27, 52.75, 21.32, 19.51, 16.83, 11.85; HRMS Calculated for  $\text{C}_{25}\text{H}_{26}\text{N}_2\text{O}_2\text{NaS}$   $[\text{M}+\text{Na}]^+$  441.1613, found 441.1610; IR (KBr)  $\nu$  3388, 1460, 1305, 1155, 1092, 1035, 666, 555  $\text{cm}^{-1}$ .

### 3. General Procedure for Pd-Catalyzed Asymmetric Hydrogenation of 3-(Toluenesulfonamidoalkyl)indoles

(*R*)-H8-BINAP (3.8 mg, 0.006 mmol) and Pd(OCOCF<sub>3</sub>)<sub>2</sub> (1.7 mg, 0.005 mmol) were placed in a dried schlenk tube under nitrogen atmosphere, and degassed anhydrous acetone 1 mL was added. The mixture was stirred at room temperature for 1 h, and then solvent was removed under vacuum to give the catalyst. In a glovebox, TsOH·H<sub>2</sub>O (0.25 mmol) and substrate **1** (0.25 mmol) were stirred in 1 mL solvent (DCM and TFE were mixed in ratio of 1:1 prior to use) at room temperature for 5 min. Subsequently, the above catalyst together with 2 mL solvent was added to the reaction mixture. The hydrogenation was performed at 50 °C under H<sub>2</sub> (600 psi) in a stainless steel autoclave for 16-20 h. After carefully releasing the hydrogen, the resulting mixture was concentrated under vacuum and dissolved in saturated aqueous NaHCO<sub>3</sub> (5 mL). After stirring for 10 min, the mixture was extracted with CH<sub>2</sub>Cl<sub>2</sub> (3×5 mL) and dried over Na<sub>2</sub>SO<sub>4</sub>. After purified by silica gel chromatography using petroleum ether/EtOAc (10/1) as eluent, the enantiomeric excess of the products were determined by HPLC with chiral columns (OJ-H, OD-H or AD-H).

Racemates of **2** were prepared by the hydrogenation of the 3-(toluenesulfonamidoalkyl)indoles catalyzed by Pd(OCOCF<sub>3</sub>)<sub>2</sub>/(+/-)-SynPhos in TFE.

(2*R*,3*R*)-(-)-**2-Methyl-3-benzylindoline (2a)**.<sup>4</sup> [Known compound, 91% *ee*, [α]<sub>D</sub><sup>27</sup> = -70.3 (*c* 1.0, CHCl<sub>3</sub>); 89% yield, 87% *ee*, [α]<sub>D</sub><sup>27</sup> = -68.0 (*c* 0.83, CHCl<sub>3</sub>); <sup>1</sup>H NMR (400 MHz, CDCl<sub>3</sub>): δ 1.23 (d, *J* = 6.5 Hz, 3H), 2.87 (dd, *J* = 13.8, 8.9 Hz, 1H), 2.97 (dd, *J* = 13.9, 7.2 Hz, 1H), 3.53 (dd, *J* = 15.9, 7.8 Hz, 1H), 3.71 (br s, 1H), 3.96-4.03 (m, 1H), 6.54-6.65 (m, 3H), 7.00 (t, *J* = 7.4, 1H), 7.17-7.31 (m, 5H); HPLC (OJ-H, elute: Hexanes/*i*-PrOH = 80/20, detector: 254 nm, flow rate: 1.0 mL/min), *t*<sub>1</sub> = 10.4 min, *t*<sub>2</sub> = 11.6 min (maj.).

(-)-**2-Methyl-3-(cyclohexylmethyl)indoline (2b)**.<sup>4</sup> [Known compound, 94% *ee*, [α]<sub>D</sub><sup>29</sup> = -8.6 (*c* 1.04, CHCl<sub>3</sub>); 97% yield, 92% *ee*, [α]<sub>D</sub><sup>27</sup> = -7.9 (*c* 0.97, CHCl<sub>3</sub>); <sup>1</sup>H NMR (400 MHz, CDCl<sub>3</sub>): δ 0.98 (d, *J* = 11.3 Hz, 2H), 1.11 (d, *J* = 6.4 Hz, 3H), 1.20-1.89 (m, 11H), 3.23-3.27 (m, 1H), 3.71 (br s, 1H), 3.92-3.96 (m, 1H), 6.62 (d, *J* = 7.6 Hz, 1H), 6.72 (t, *J* = 7.4 Hz, 1H), 7.00-7.06 (m, 2H); HPLC (OD-H, elute: Hexanes/*i*-PrOH = 99/1, detector: 254 nm, flow rate: 1.0 mL/min), *t*<sub>1</sub> = 9.6 min, *t*<sub>2</sub> = 11.5 min (maj.).

(-)-**2-Methyl-3-(4-fluorobenzyl)indoline (2c)**.<sup>4</sup> [Known compound, 88% *ee*, [α]<sub>D</sub><sup>28</sup> = -76.3 (*c* 0.84, CHCl<sub>3</sub>); 81% yield, 86% *ee*, [α]<sub>D</sub><sup>27</sup> = -71.5 (*c* 0.83, CHCl<sub>3</sub>); <sup>1</sup>H NMR (400 MHz, CDCl<sub>3</sub>): δ 1.24 (d, *J* = 6.1 Hz, 3H), 2.77-2.83 (m, 1H), 2.91-2.96 (m, 1H), 3.42-3.44 (m, 1H), 3.70 (br s, 1H), 3.98-4.01 (m, 1H), 6.49 (d, *J* = 6.6 Hz, 1H), 6.57-6.65 (m, 2H), 6.95-7.10 (m, 5H); HPLC (OJ-H, elute: Hexanes/*i*-PrOH = 90/10, detector: 254 nm, flow rate: 1.0 mL/min), *t*<sub>1</sub> = 15.1 min, *t*<sub>2</sub> = 17.1 min (maj.).

(-)-**2-Methyl-3-(4-methylbenzyl)indoline (2d)**.<sup>4</sup> [Known compound, 90% *ee*, [α]<sub>D</sub><sup>30</sup> = -64.5 (*c* 1.0, CHCl<sub>3</sub>); 84% yield, 84% *ee*, [α]<sub>D</sub><sup>27</sup> = -75.9 (*c* 0.80, CHCl<sub>3</sub>); <sup>1</sup>H NMR (400 MHz, CDCl<sub>3</sub>): δ 1.30 (d, *J* = 6.5 Hz, 3H), 2.09 (s, 3H), 2.86 (qd, *J* = 22.8, 8.0 Hz, 1H), 3.41 (d, *J* = 8.3 Hz, 1H), 3.72 (d, *J* = 7.0 Hz, 1H), 3.99-4.13 (m, 1H), 6.39 (d, *J* = 7.4 Hz, 1H), 6.54 (t, *J* = 7.3 Hz, 1H), 6.64 (d, *J* = 7.7 Hz, 1H), 7.00 (t, *J* = 7.6 Hz, 1H), δ 7.09-7.12 (m, 4H); HPLC (OJ-H, elute: Hexanes/*i*-PrOH = 90/10, detector: 254 nm, flow rate: 1.0 mL/min), *t*<sub>1</sub> = 12.9 min, *t*<sub>2</sub> = 16.1 min (maj.).

(-)-**2-Methyl-3-(3-methylbenzyl)indoline (2e)**.<sup>4</sup> [Known compound, 90% *ee*, [α]<sub>D</sub><sup>28</sup> = -63.7 (*c*

0.96, CHCl<sub>3</sub>); 97% yield, 87% *ee*, [ $\alpha$ ]<sub>D</sub><sup>28</sup> = -59.8 (*c* 0.97, CHCl<sub>3</sub>); <sup>1</sup>H NMR (400 MHz, CDCl<sub>3</sub>):  $\delta$  1.21 (d, *J* = 6.5 Hz, 3H), 2.33 (s, 3H), 2.89 (qd, *J* = 14.0, 8.0 Hz, 2H), 3.35-3.87 (m, 2H), 3.95-4.02 (m, 1H), 6.53-6.68 (m, 3H), 6.93-7.08 (m, 4H), 7.18 (t, *J* = 7.5 Hz, 1H); HPLC (OJ-H, elute: Hexanes/*i*-PrOH = 90/10, detector: 254 nm, flow rate: 1.0 mL/min), *t*<sub>1</sub> = 12.7 min (maj.), *t*<sub>2</sub> = 13.6 min.

**(-)-2-Methyl-3-(2-methylbenzyl)indoline (2f).**<sup>4</sup> [Known compound, 91% *ee*, [ $\alpha$ ]<sub>D</sub><sup>29</sup> = -79.0 (*c* 0.82, CHCl<sub>3</sub>); 93% yield, 89% *ee*, [ $\alpha$ ]<sub>D</sub><sup>27</sup> = -84.0 (*c* 0.90, CHCl<sub>3</sub>); <sup>1</sup>H NMR (400 MHz, CDCl<sub>3</sub>):  $\delta$  1.23 (d, *J* = 6.5 Hz, 3H), 2.14 (s, 3H), 2.33 (s, 3H), 2.81-2.96 (m, 2H), 3.52-3.58 (m, 2H), 4.01 (p, *J* = 7.0 Hz, 1H), 6.47 (d, *J* = 7.2 Hz, 1H), 6.54 (t, *J* = 7.3 Hz, 1H), 6.86 (d, *J* = 7.3 Hz, 1H), 6.93-7.08 (m, 3H), 7.18 (t, *J* = 7.4 Hz, 1H); HPLC (OJ-H, elute: Hexanes/*i*-PrOH = 85/15, detector: 254 nm, flow rate: 0.8 mL/min), *t*<sub>1</sub> = 11.4 min (maj.), *t*<sub>2</sub> = 15.0 min.

**(-)-2-Butyl-3-benzylindoline (2g).**<sup>4</sup> [Known compound, 94% *ee*, [ $\alpha$ ]<sub>D</sub><sup>28</sup> = -86.3 (*c* 1.10, CHCl<sub>3</sub>); 97% yield, 92% *ee*, [ $\alpha$ ]<sub>D</sub><sup>30</sup> = -79.4 (*c* 1.03, CHCl<sub>3</sub>); <sup>1</sup>H NMR (400 MHz, CDCl<sub>3</sub>):  $\delta$  0.93 (t, *J* = 6.9 Hz, 3H), 1.33-1.43 (m, 4H), 1.65-1.70 (m, 2H), 2.65 (dd, *J* = 13.3, 10.4 Hz, 1H), 2.99 (dd, *J* = 13.4, 5.6 Hz, 1H), 3.36-3.78 (m, 1H), 3.81 (br s, 1H), 3.81 (dd, *J* = 13.9, 7.6 Hz), 6.32 (d, *J* = 7.3 Hz, 1H), 6.50 (t, *J* = 7.4 Hz, 1H), 6.64 (d, *J* = 7.7 Hz, 1H), 6.98 (t, *J* = 7.6 Hz, 1H), 7.08 (d, *J* = 7.2 Hz, 2H), 7.18-7.28 (m, 5H); HPLC (AD-H, elute: Hexanes/*i*-PrOH = 95/5, detector: 254 nm, flow rate: 0.8 mL/min), *t*<sub>1</sub> = 7.9 min (maj.), *t*<sub>2</sub> = 10.7 min.

**(-)-2-Phenethyl-3-benzylindoline (2h).**<sup>4</sup> [Known compound, 93% *ee*, [ $\alpha$ ]<sub>D</sub><sup>30</sup> = -74.3 (*c* 0.67, CHCl<sub>3</sub>); 95% yield, 91% *ee*, [ $\alpha$ ]<sub>D</sub><sup>30</sup> = -64.5 (*c* 1.20, CHCl<sub>3</sub>); <sup>1</sup>H NMR (400 MHz, CDCl<sub>3</sub>):  $\delta$  2.01-2.07 (m, 2H), 2.62-2.80 (m, 3H), 3.01 (dd, *J* = 13.4, 5.5 Hz, 1H), 3.39-3.41 (m, 1H), 3.86-3.89 (m, 2H), 6.28 (d, *J* = 7.3 Hz, 1H), 6.51 (t, *J* = 7.4 Hz, 1H), 6.63 (d, *J* = 7.7 Hz, 1H), 6.99 (t, *J* = 7.4 Hz, 1H), 7.06 (d, *J* = 7.0 Hz, 2H), 7.21-7.32 (m, 8H); HPLC (OD-H, elute: Hexanes/*i*-PrOH = 90/10, detector: 254 nm, flow rate: 1.0 mL/min), *t*<sub>1</sub> = 9.6 min, *t*<sub>2</sub> = 10.9 min (maj.).

**(-)-2,7-Dimethyl-3-benzylindoline (2i).**<sup>4</sup> (Known compound, 97% *ee*, [ $\alpha$ ]<sub>D</sub><sup>29</sup> = -70.6 (*c* 0.88, CHCl<sub>3</sub>); 94% yield, 95% *ee*, [ $\alpha$ ]<sub>D</sub><sup>30</sup> = -75.7 (*c* 0.93, CHCl<sub>3</sub>); <sup>1</sup>H NMR (400 MHz, CDCl<sub>3</sub>):  $\delta$  1.25 (d, *J* = 8.5 Hz, 1H), 2.15 (s, 3H), 2.83-3.00 (m, 2H), 3.53-3.55 (m, 2H), 4.00-4.02 (m, 1H), 6.41-6.53 (m, 2H), 6.85 (m, 1H), 7.16-7.29 (m, 5H); HPLC (OD-H, elute: Hexanes/*i*-PrOH = 99/1, detector: 254 nm, flow rate: 1.0 mL/min), *t*<sub>1</sub> = 12.8 min, *t*<sub>2</sub> = 20.9 min (maj.).

**(-)-2,7-Dimethyl-3-(cyclohexylmethyl)indoline (2j).**<sup>4</sup> [Known compound, 97% *ee*, [ $\alpha$ ]<sub>D</sub><sup>29</sup> = -17.0 (*c* 0.96, CHCl<sub>3</sub>); 90% yield, 97% *ee*, [ $\alpha$ ]<sub>D</sub><sup>28</sup> = -21.6 (*c* 0.80, CHCl<sub>3</sub>); <sup>1</sup>H NMR (400 MHz, CDCl<sub>3</sub>):  $\delta$  0.93-0.95 (m, 2H), 1.12-1.29 (m, 6H), 1.39-1.44 (m, 2H), 1.52-1.54 (m, 1H), 1.66-1.76 (m, 4H), 1.87-1.90 (m, 1H), 2.13 (s, 3H), 3.26 (q, *J* = 7.4 Hz, 1H), 3.43 (br s, 1H), 3.93-4.00 (m, 1H), 6.67 (t, *J* = 7.4 Hz, 1H), 6.87 (d, *J* = 7.4 Hz, 1H), 6.92 (d, *J* = 7.3 Hz, 1H); HPLC (OD-H, elute: Hexanes/*i*-PrOH = 99/1, detector: 254 nm, flow rate: 1.0 mL/min), *t*<sub>1</sub> = 5.5 min, *t*<sub>2</sub> = 6.4 min (maj.).

**(-)-2,7-Dimethyl-3-(2-methylpropyl)indoline (2k).**<sup>4</sup> [Known compound, 97% *ee*, [ $\alpha$ ]<sub>D</sub><sup>30</sup> = -3.74 (*c* 0.93, CHCl<sub>3</sub>); 88% yield, 94% *ee*, [ $\alpha$ ]<sub>D</sub><sup>28</sup> = -7.6 (*c* 0.47, CHCl<sub>3</sub>); <sup>1</sup>H NMR (400 MHz, CDCl<sub>3</sub>):  $\delta$  0.95 (d, *J* = 6.6 Hz, 3H), 1.00 (d, *J* = 6.6 Hz, 3H), 1.14 (d, *J* = 6.5 Hz, 3H), 1.40-1.45 (m, 1H), 1.52-1.57 (m, 1H), 1.71-1.74 (m, 1H), 2.13 (s, 3H), 3.22 (q, *J* = 7.8 Hz, 1H), 3.46 (br s, 1H), 3.94-4.01 (m, 1H), 6.67 (t, *J* = 7.4 Hz, 1H), 6.87 (d, *J* = 7.4 Hz, 1H), 6.94 (d, *J* = 7.3 Hz, 1H); HPLC (OJ-H, elute: Hexanes/*i*-PrOH = 90/10, detector: 254 nm, flow rate: 1.0 mL/min), *t*<sub>1</sub> = 5.1 min, *t*<sub>2</sub> = 5.7 min (maj.).

**(-)-2,7-Dimethyl-3-(4-methylbenzyl)indoline (2l).**<sup>4</sup> [Known compound, 96% *ee*, [ $\alpha$ ]<sub>D</sub><sup>27</sup> = -69.7 (*c* 1.17, CHCl<sub>3</sub>); 87% yield, 94% *ee*, [ $\alpha$ ]<sub>D</sub><sup>24</sup> = -80.8 (*c* 1.17, CHCl<sub>3</sub>); <sup>1</sup>H NMR (400 MHz, CDCl<sub>3</sub>):  $\delta$  = 1.23 (d, *J* = 6.3, 3H), 2.14 (s, 3H), 2.34 (s, 3H), 2.71-3.02 (m, 2H), 3.46-3.66 (m, 2H), 3.84-4.20 (m, 1H), 6.41-6.67 (m, 2H), 6.86 (d, *J* = 6.3, 1H), 7.07-7.09 (d, *J* = 6.0, 4H); HPLC (OD-H, elute: Hexanes/*i*-PrOH

= 99/1, detector: 254 nm, flow rate: 1.0 mL/min),  $t_1$  = 8.0 min,  $t_2$  = 11.1 min (maj.).

**(-)-2,7-Dimethyl-3-(3-methylbenzyl)indoline (2m).**<sup>4</sup> [Known compound, 95% *ee*,  $[\alpha]_D^{28}$  = -61.1 (*c* 1.07, CHCl<sub>3</sub>); 97% yield, 93% *ee*,  $[\alpha]_D^{28}$  = -75.0 (*c* 0.83, CHCl<sub>3</sub>); <sup>1</sup>H NMR (400 MHz, CDCl<sub>3</sub>):  $\delta$  1.24 (d, *J* = 6.5 Hz, 3H), 2.15 (s, 3H), 2.34 (s, 3H), 2.84-2.96 (m, 2H), 3.52-3.58 (m, 2H), 4.00-4.03 (m, 1H), 6.47 (d, *J* = 7.3 Hz, 1H), 6.55 (t, *J* = 7.4 Hz, 1H), 6.87 (d, *J* = 7.4 Hz, 1H), 6.97-7.04 (m, 3H), 7.18 (t, *J* = 7.5 Hz, 1H); HPLC (OD-H, elute: Hexanes/*i*-PrOH = 99/1, detector: 254 nm, flow rate: 1.0 mL/min),  $t_1$  = 8.8 min,  $t_2$  = 12.6 min (maj.).

**(-)-2,7-Dimethyl-3-(2-methylbenzyl)indoline (2n).**<sup>4</sup> [Known compound, 94% *ee*,  $[\alpha]_D^{29}$  = - 89.7 (*c* 0.92, CHCl<sub>3</sub>); 97% yield, 94% *ee*,  $[\alpha]_D^{30}$  = -87.0 (*c* 0.97, CHCl<sub>3</sub>); <sup>1</sup>H NMR (400 MHz, CDCl<sub>3</sub>):  $\delta$  1.32 (d, *J* = 6.6 Hz, 3H), 2.09 (s, 3H), 2.15 (s, 3H), 2.80-2.95 (m, 2H), 3.44 (dd, *J* = 16.3, 7.2 Hz, 1H), 3.58 (br s, 1H), 4.05-4.08 (m, 1H), 6.27 (d, *J* = 7.3 Hz, 1H), 6.49 (t, *J* = 7.4 Hz, 1H), 6.85 (d, *J* = 7.4 Hz, 1H), 7.08-7.14 (m, 4H); HPLC (OJ-H, elute: Hexanes/*i*-PrOH = 90/10, detector: 254 nm, flow rate: 1.0 mL/min),  $t_1$  = 6.1 min (maj.),  $t_2$  = 7.8 min.

#### 4. General Procedure for Pd-Catalyzed Tandem Reactions of 2-Substituted Indoles and *N*-Tosyl Imines<sup>5</sup>

(*R*)-H8-BINAP (3.8 mg, 0.006 mmol) and Pd(OCOCF<sub>3</sub>)<sub>2</sub> (1.7 mg, 0.005 mmol) were placed in a dried Schlenk tube under nitrogen atmosphere, and degassed anhydrous acetone was added. The mixture was stirred at rt for 1 h, then solvent was removed under vacuum to give the catalyst. In a glovebox, acid (0.25 mmol) and indole (0.25 mmol) were stirred in 1 mL DCM/TFE at room temperature for 1 min. Subsequently, *N*-tosyl imine (0.25 mmol) was added to the solution. Finally, the above catalyst together with 2 mL DCM/TFE was added to the reaction mixture. The hydrogenation was performed at 50 °C under H<sub>2</sub> (600 psi) in a stainless steel autoclave for 16 h. After carefully releasing the hydrogen, the resulting mixture was concentrated under vacuum and dissolved in saturated aqueous NaHCO<sub>3</sub> (5 mL). After stirring for 10 min, the mixture was extracted with CH<sub>2</sub>Cl<sub>2</sub> (3×5 mL) and dried over Na<sub>2</sub>SO<sub>4</sub>. After purified by silica gel chromatography using petroleum ether/EtOAc (10/1) as eluent, the enantiomeric excess of the products were determined by HPLC with chiral column.

#### 5. References

1. Q. Kang, Z.-A. Zhao, S.-L. You, *J. Am. Chem. Soc.*, 2007, **129**, 1484.
2. F. Xu, D. Huang, C. Han, W. Shen, X. Lin, Y. Wang, *J. Org. Chem.*, 2010, **75**, 8677.
3. Q.-L. He, F.-L. Sun, X.-J. Zheng, S.-L. You, *Synlett*, 2009, 1111.
4. D.-S. Wang, J. Tang, Y.-G. Zhou, M.-W. Chen, C.-B. Yu, Y. Duan, G.-F. Jiang, *Chem. Sci.*, 2011, **2**, 803.
5. Y. Duan, M.-W. Chen, Z.-S. Ye, D.-S. Wang, Q.-A. Chen, Y.-G. Zhou, *Chem. Eur. J.*, 2011, **17**, 7193.

6. Copy of NMR and HRMS Spectra

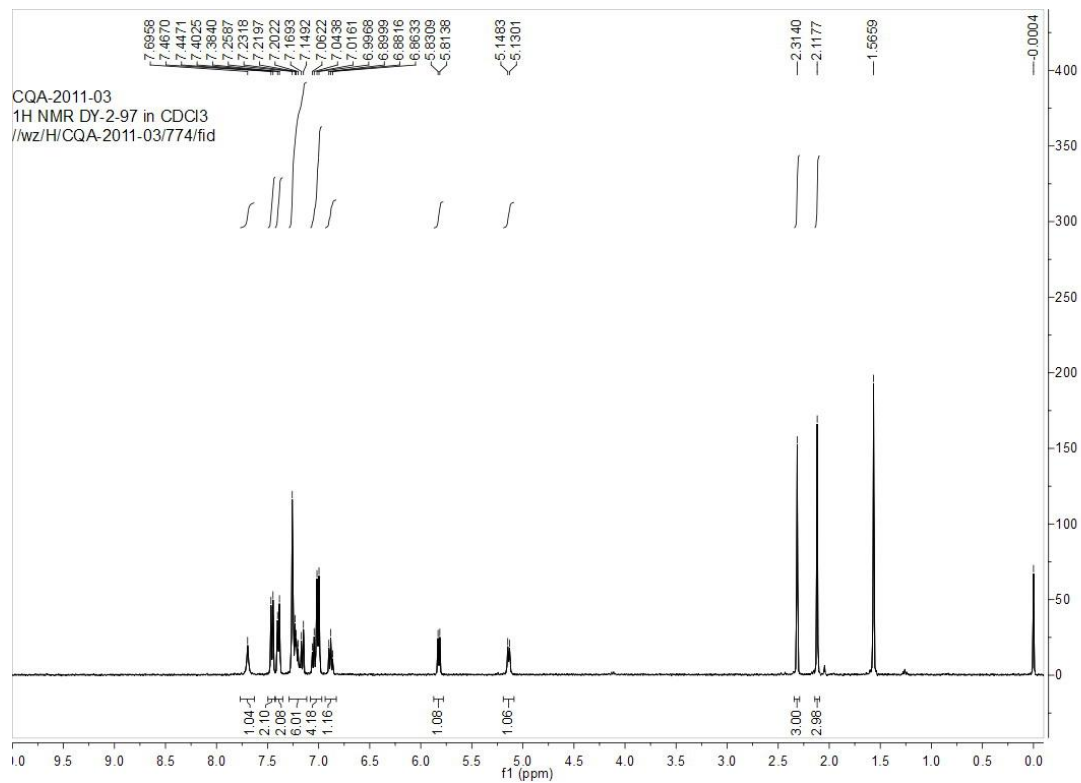

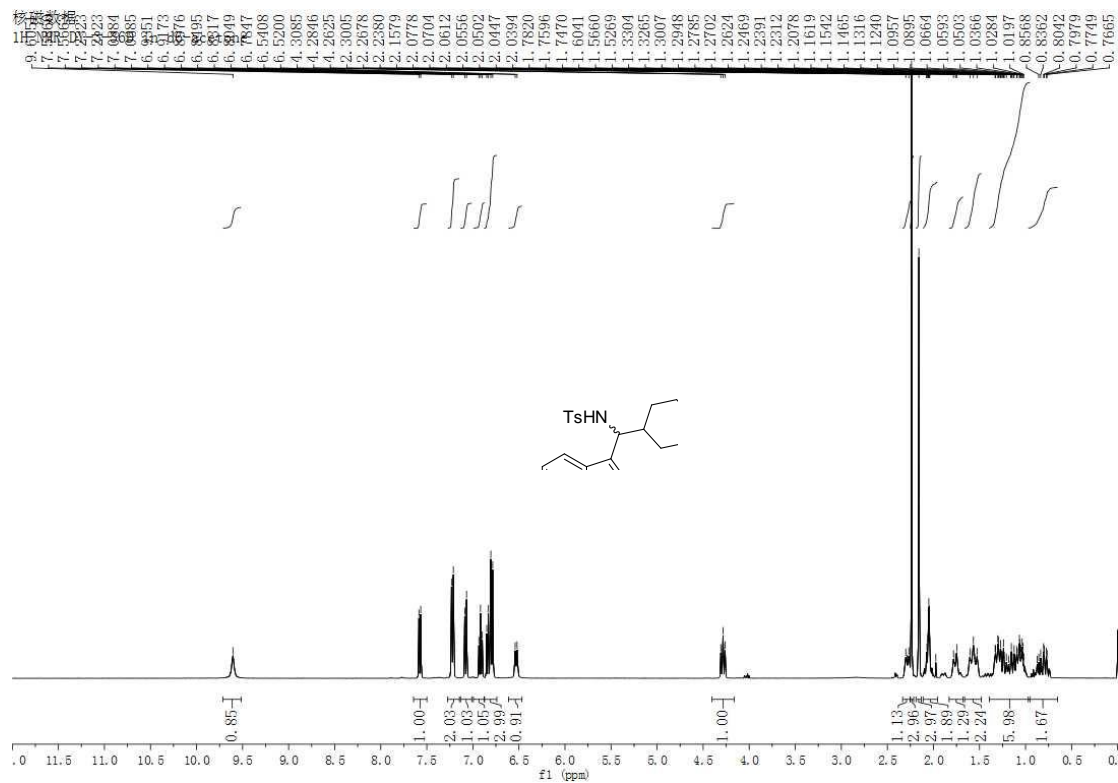

CQA-2011-03  
13C NMR DI-3-560 in d<sub>6</sub>-acetone

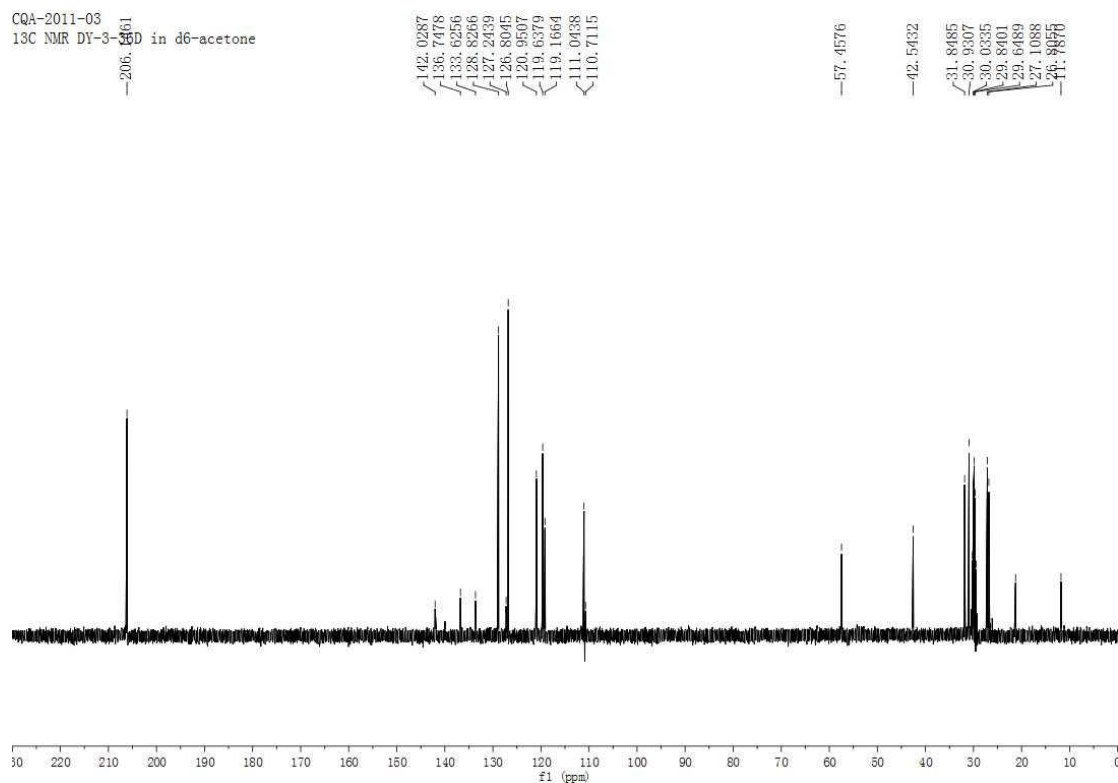

# Elemental Composition Report

Page 1

## Single Mass Analysis

Tolerance = 50.0 PPM / DBE: min = -10.0, max = 100.0

Selected filters: None

Monoisotopic Mass, Even Electron Ions

6 formula(e) evaluated with 1 results within limits (all results (up to 1000) for each mass)

Elements Used:

C: 0-100 H: 0-120 N: 2-2 O: 2-2 Na: 1-1 S: 1-1

DY-3-36C

11011716 17 (0.420) AM (Cen,6, 80.00, Ar,5000.0,429.20,0.70,LS 10); Sm (SG, 2x3.00); Sb (1,40.00); Cm (17:18)

1: TOF MS ES+  
1.35e3

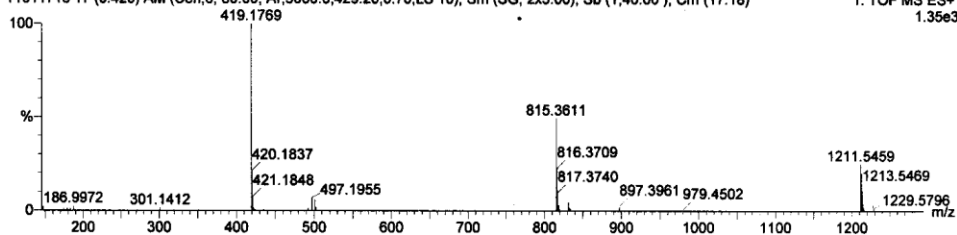

Minimum: -10.0  
Maximum: 5.0 50.0 100.0

| Mass     | Calc. Mass | mDa | PPM | DBE  | i-FIT | Formula            |
|----------|------------|-----|-----|------|-------|--------------------|
| 419.1769 | 419.1769   | 0.0 | 0.0 | 10.5 | 10.1  | C23 H28 N2 O2 Na S |

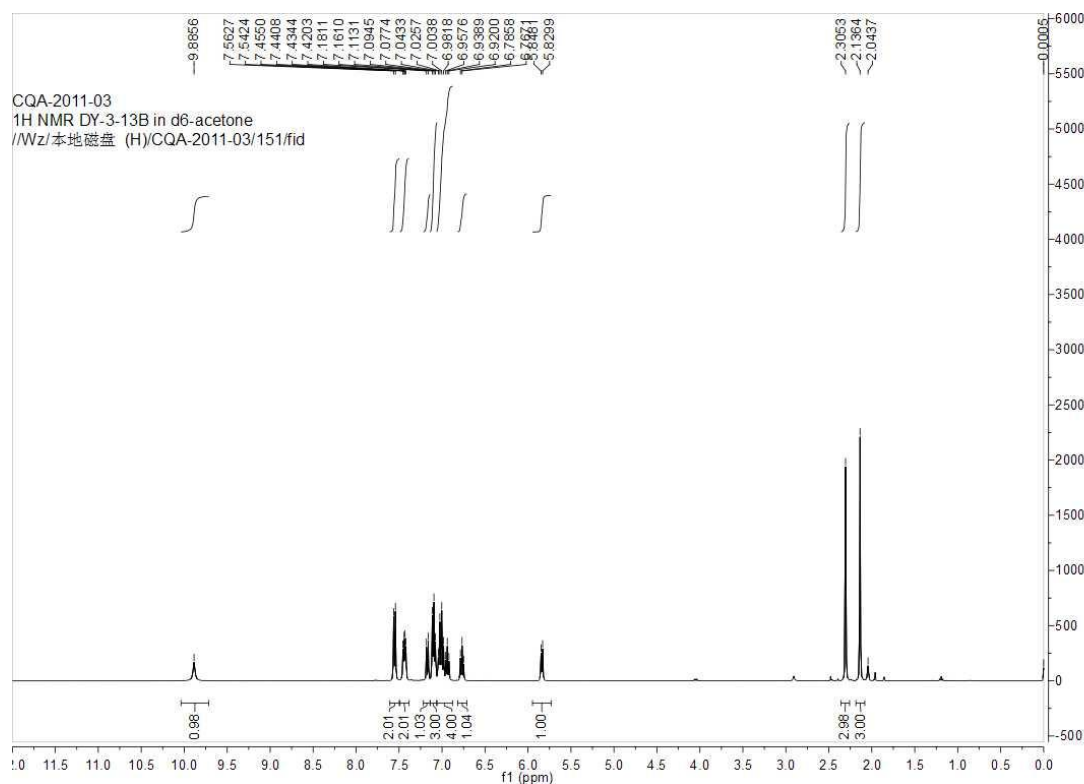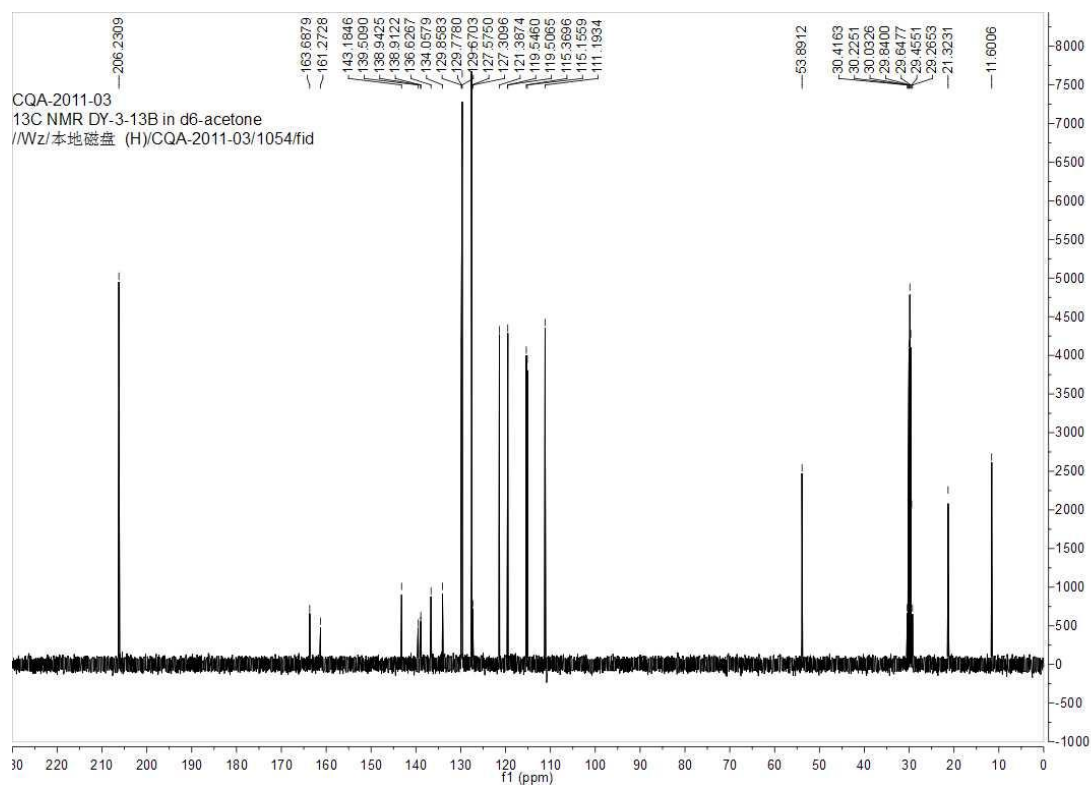

## Elemental Composition Report

Page 1

### Single Mass Analysis

Tolerance = 50.0 PPM / DBE: min = -10.0, max = 100.0

Selected filters: None

Monoisotopic Mass, Even Electron Ions

5 formula(e) evaluated with 1 results within limits (all results (up to 1000) for each mass)

Elements Used:

C: 0-100 H: 0-120 N: 2-2 O: 2-2 Na: 1-1 S: 1-1 F: 1-1

DY-3-13B

11011723 10 (0.251) AM (Cen,6, 80.00, Ar,5000.0,429.20,0.70,LS 10); Sm (SG, 2x3.00); Sb (1,40.00); Cm (2:11)

1: TOF MS ES+  
4.94e3

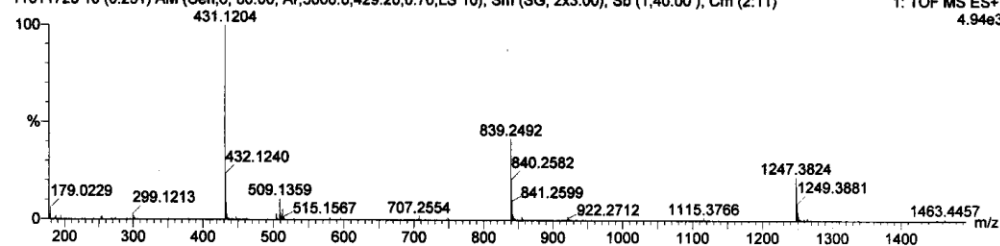

Minimum: -10.0  
Maximum: 100.0

| Mass     | Calc. Mass | mDa  | PPM  | DBE  | i-FIT | Formula              |
|----------|------------|------|------|------|-------|----------------------|
| 431.1204 | 431.1205   | -0.1 | -0.2 | 13.5 | 14.1  | C23 H21 N2 O2 Na S F |

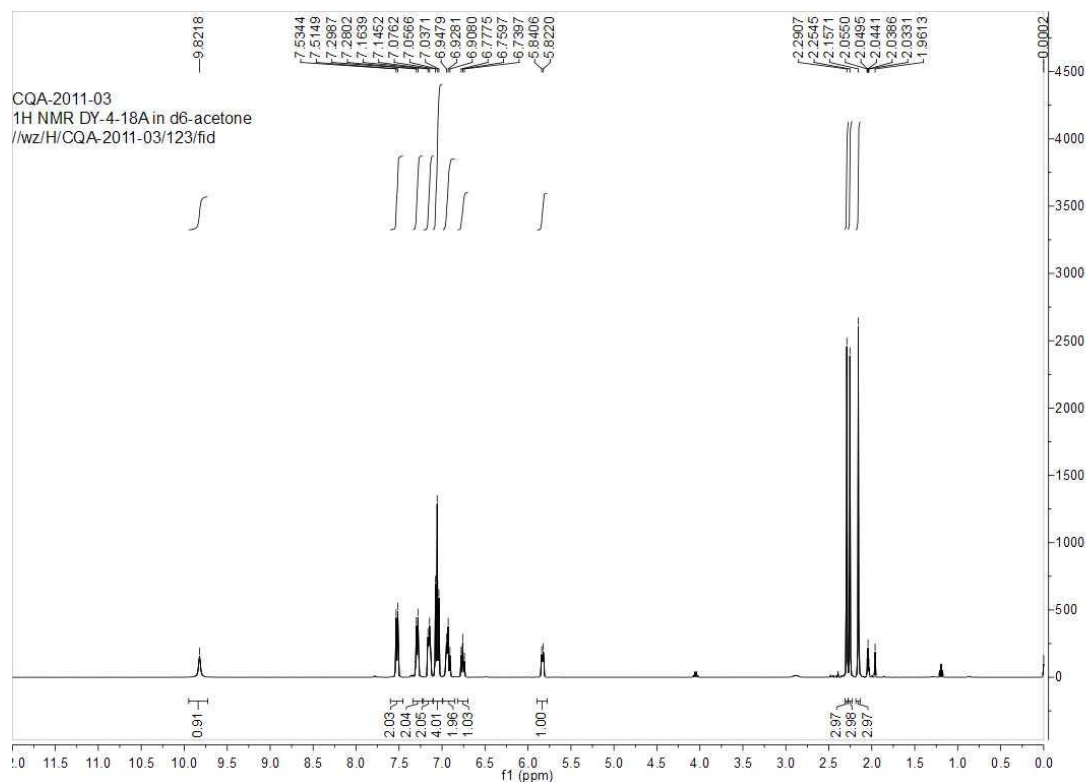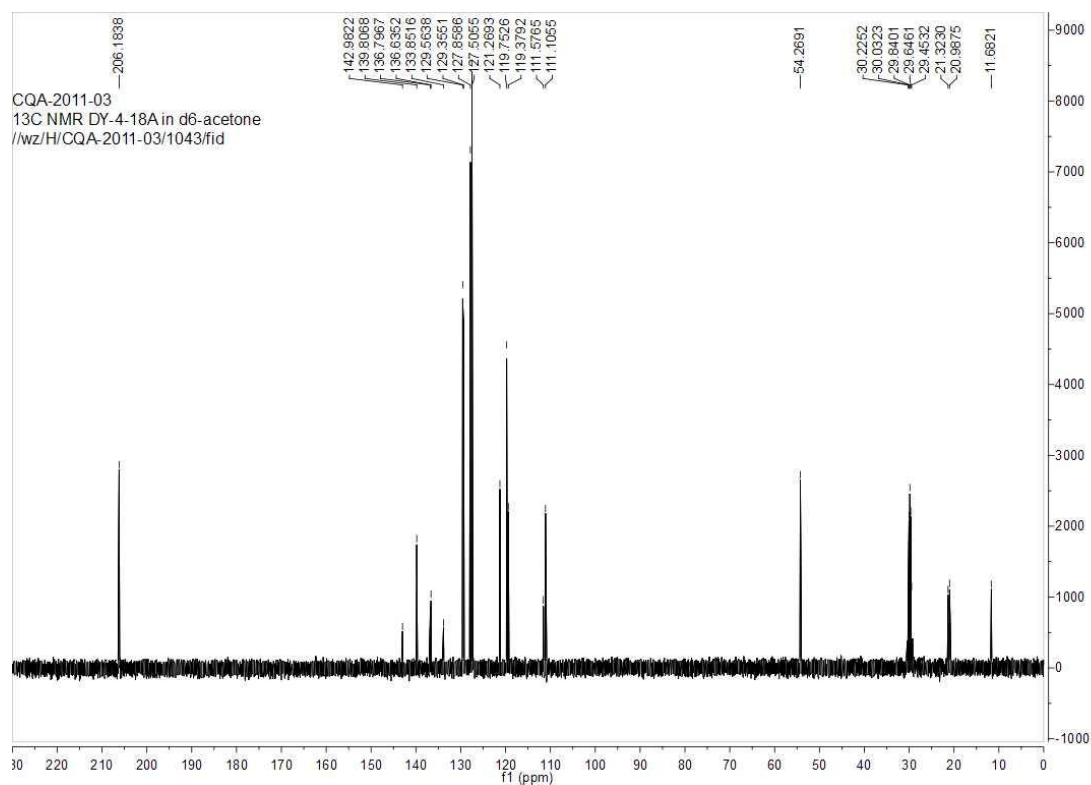

Elemental Composition Report

Page 1

Single Mass Analysis

Tolerance = 50.0 PPM / DBE: min = -10.0, max = 100.0

Selected filters: None

Monoisotopic Mass, Even Electron Ions

6 formula(e) evaluated with 1 results within limits (all results (up to 1000) for each mass)

Elements Used:

C: 0-100 H: 0-120 N: 2-2 O: 2-2 Na: 1-1 S: 1-1

DY-3-18A

11011708 20 (0.521) AM (Cen,6, 80.00, Ar,5000.0,429.20,0.70,LS 10); Sm (SG, 2x3.00); Sb (1,40.00 ); Cm (20:26)

1: TOF MS ES+  
1.08e4

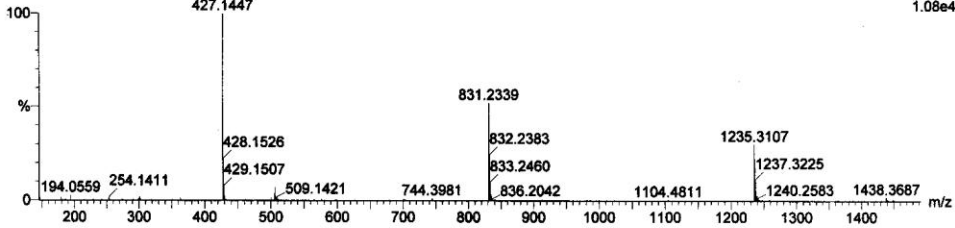

Minimum: -10.0  
Maximum: 50.0 100.0

| Mass     | Calc. Mass | mDa  | PPM  | DBE  | i-FIT | Formula            |
|----------|------------|------|------|------|-------|--------------------|
| 427.1447 | 427.1456   | -0.9 | -2.1 | 13.5 | 72.0  | C24 H24 N2 O2 Na S |

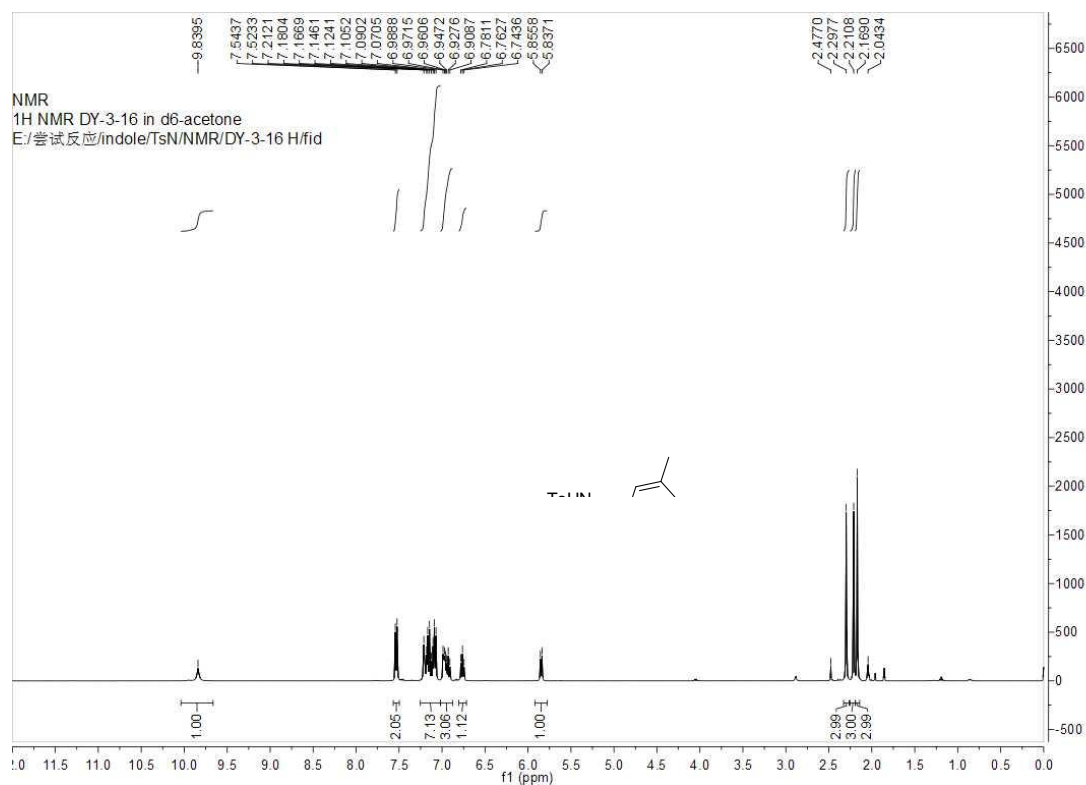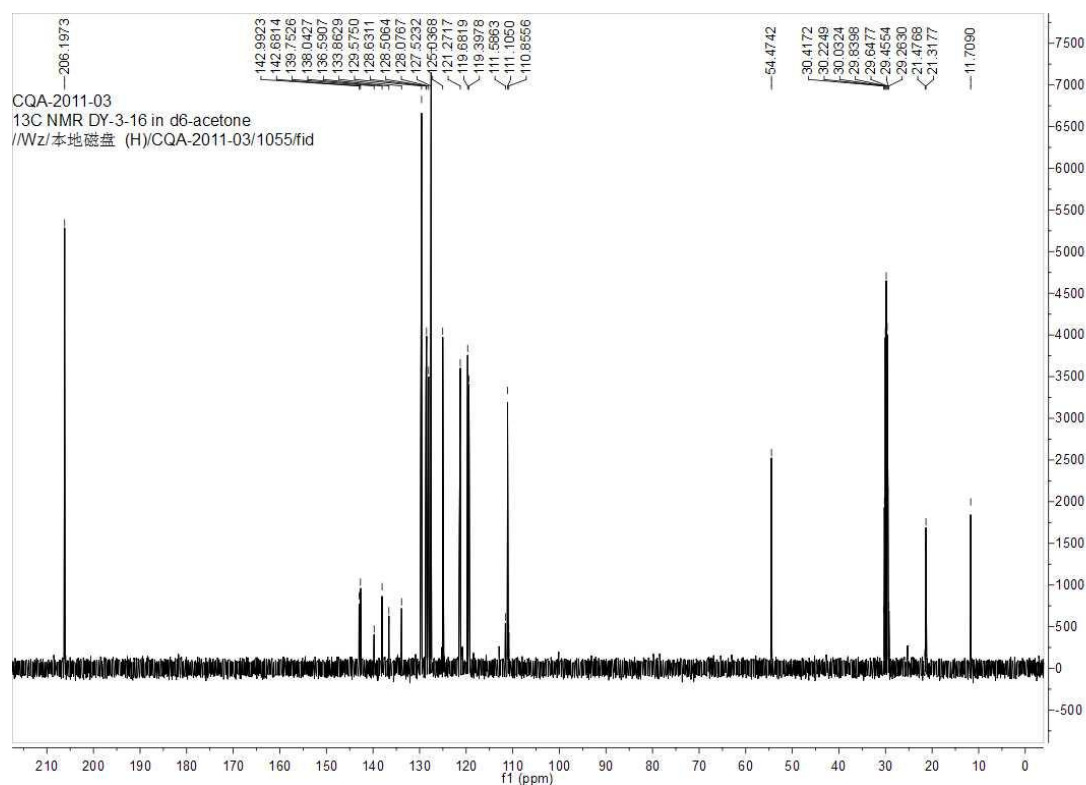

Elemental Composition Report

Page 1

Single Mass Analysis

Tolerance = 50.0 PPM / DBE: min = -10.0, max = 100.0

Selected filters: None

Monoisotopic Mass, Even Electron Ions

6 formula(e) evaluated with 1 results within limits (all results (up to 1000) for each mass)

Elements Used:

C: 0-100 H: 0-120 N: 2-2 O: 2-2 Na: 1-1 S: 1-1

DY-3-16

11011710 70 (1.788) AM (Cen,6, 80.00, Ar,5000.0,429.20,0.70,LS 10); Sm (SG, 2x3.00); Sb (1,40.00); Cm (70:72)

1: TOF MS ES+  
2.15e3

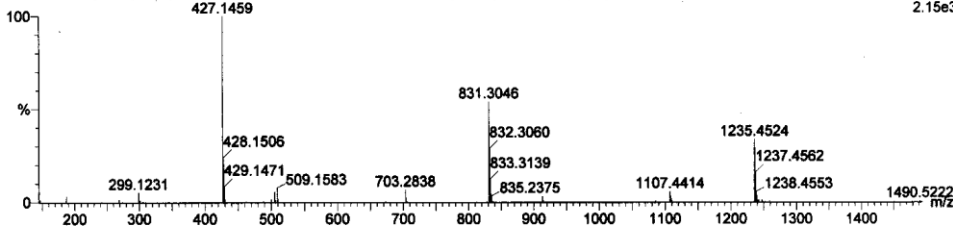

Minimum: -10.0  
Maximum: 50.0 100.0

| Mass     | Calc. Mass | mDa | PPM | DBE  | i-FIT | Formula            |
|----------|------------|-----|-----|------|-------|--------------------|
| 427.1459 | 427.1456   | 0.3 | 0.7 | 13.5 | 7.7   | C24 H24 N2 O2 Na S |

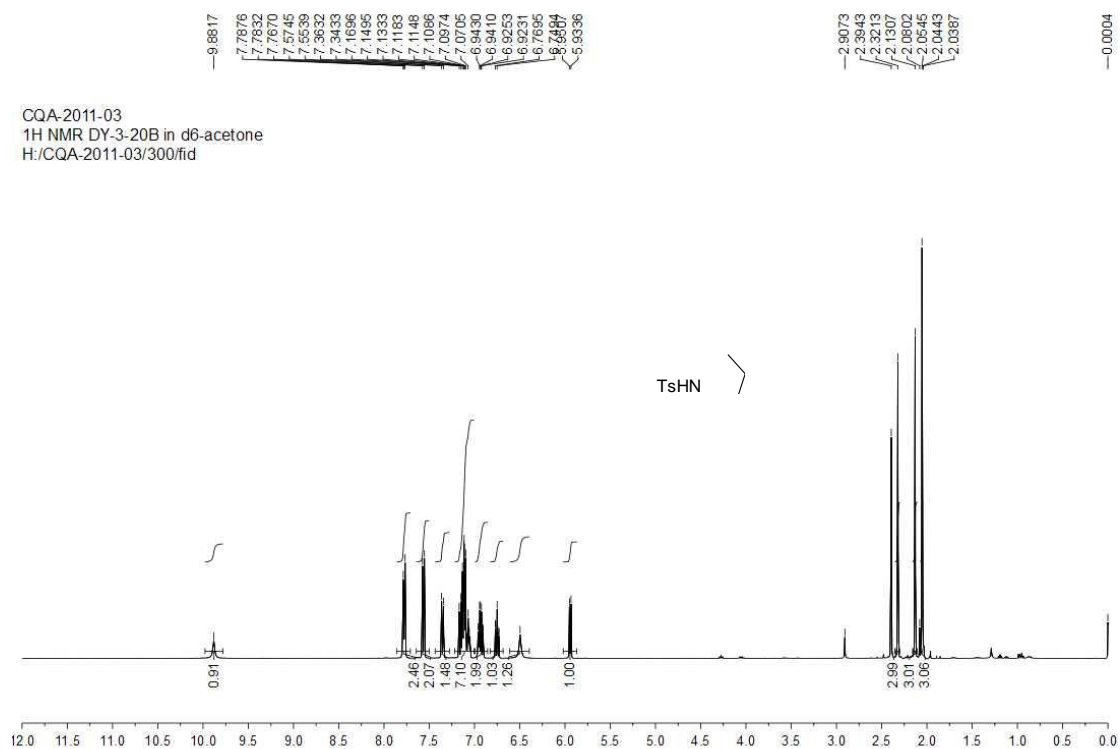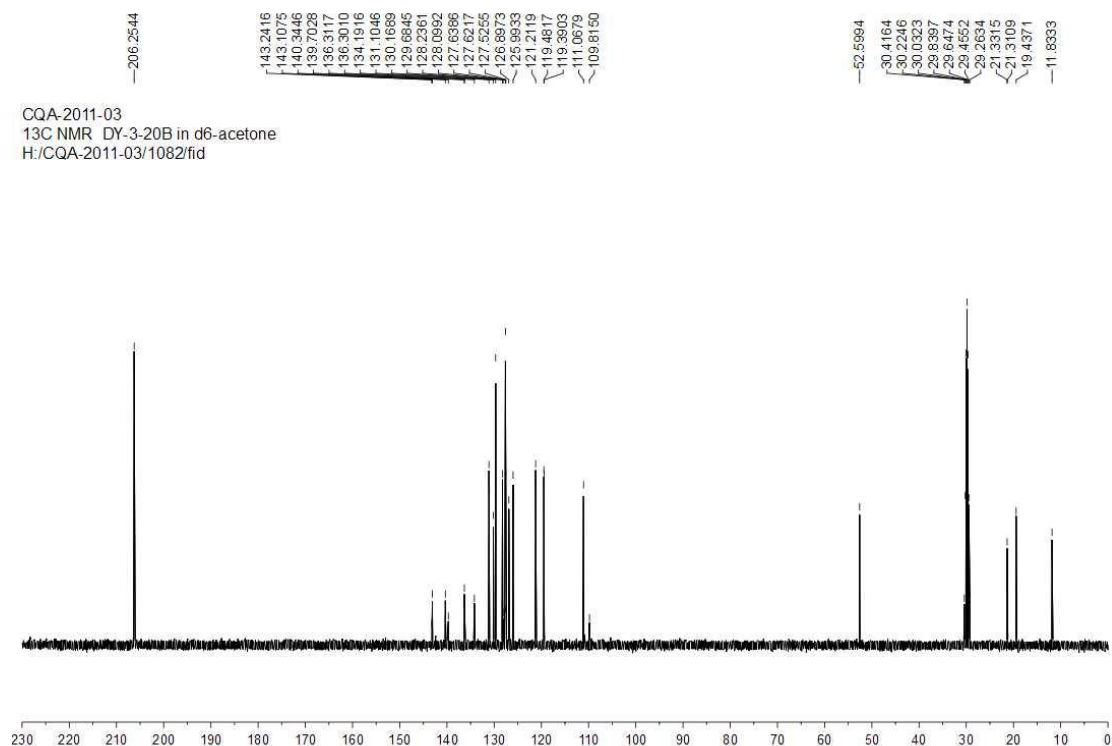

# Elemental Composition Report

Page 1

## Single Mass Analysis

Tolerance = 50.0 PPM / DBE: min = -10.0, max = 100.0

Selected filters: None

Monoisotopic Mass, Even Electron Ions

6 formula(e) evaluated with 1 results within limits (all results (up to 1000) for each mass)

Elements Used:

C: 0-100 H: 0-120 N: 2-2 O: 2-2 Na: 1-1 S: 1-1

DY-3-20B

11011712 65 (1.806) AM (Cen, 6, 80.00, Ar, 5000.0, 429.20, 0.70, LS 10); Sm (SG, 2x3.00); Sb (1, 40.00); Cm (65.69)

1: TOF MS ES+  
3.45e3

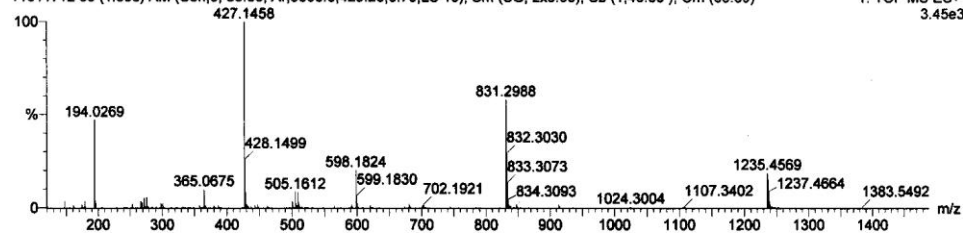

Minimum: -10.0  
Maximum: 50.0 100.0

| Mass     | Calc. Mass | mDa | PPM | DBE  | i-FIT | Formula            |
|----------|------------|-----|-----|------|-------|--------------------|
| 427.1458 | 427.1456   | 0.2 | 0.5 | 13.5 | 4.5   | C24 H24 N2 O2 Na S |



Elemental Composition Report

Page 1

Single Mass Analysis

Tolerance = 50.0 PPM / DBE: min = -10.0, max = 100.0

Selected filters: None

Monoisotopic Mass, Even Electron Ions

6 formula(e) evaluated with 1 results within limits (all results (up to 1000) for each mass)

Elements Used:

C: 0-100 H: 0-120 N: 2-2 O: 2-2 Na: 1-1 S: 1-1

DY-3-29B

11011714 30 (0.747) AM (Cen, 6, 80.00, Ar, 5000.0, 429.20, 0.70, LS 10); Sm (SG, 2x3.00); Sb (1, 40.00 ); Cm (25.41)

1: TOF MS ES+  
1.07e4

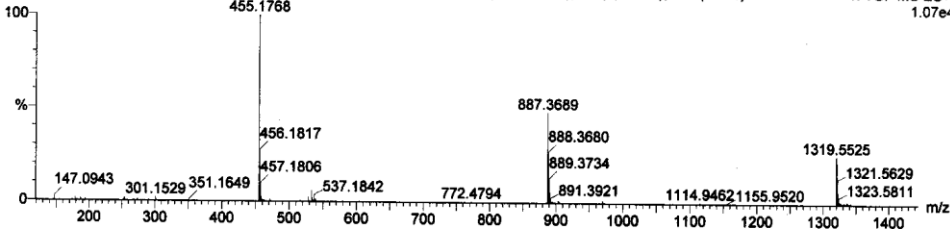

Minimum: -10.0  
Maximum: 50.0 100.0

| Mass     | Calc. Mass | mDa  | PPM  | DBE  | i-FIT | Formula            |
|----------|------------|------|------|------|-------|--------------------|
| 455.1768 | 455.1769   | -0.1 | -0.2 | 13.5 | 20.0  | C26 H28 N2 O2 Na S |



# Elemental Composition Report

Page 1

## Single Mass Analysis

Tolerance = 50.0 PPM / DBE: min = -10.0, max = 100.0

Selected filters: None

Monoisotopic Mass, Even Electron Ions

7 formula(e) evaluated with 1 results within limits (all results (up to 1000) for each mass)

Elements Used:

C: 0-100 H: 0-120 N: 2-2 O: 2-2 Na: 1-1 S: 1-1

DY-3-57A

11011715 51 (1.304) AM (Cen,6, 80.00, Ar,5000,0,429.20,0.70,LS 10); Sm (SG, 2x3.00); Sb (1,40.00); Cm (50:53)

1: TOF MS ES+  
3.04e3

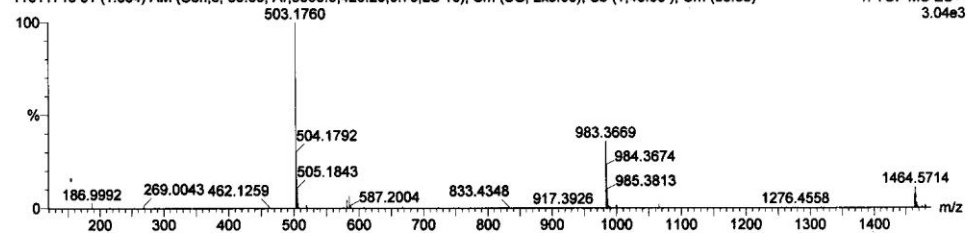

Minimum: -10.0  
Maximum: 50.0 100.0

| Mass     | Calc. Mass | mDa  | PPM  | DBE  | i-FIT | Formula            |
|----------|------------|------|------|------|-------|--------------------|
| 503.1760 | 503.1769   | -0.9 | -1.8 | 17.5 | 10.4  | C30 H28 N2 O2 Na S |

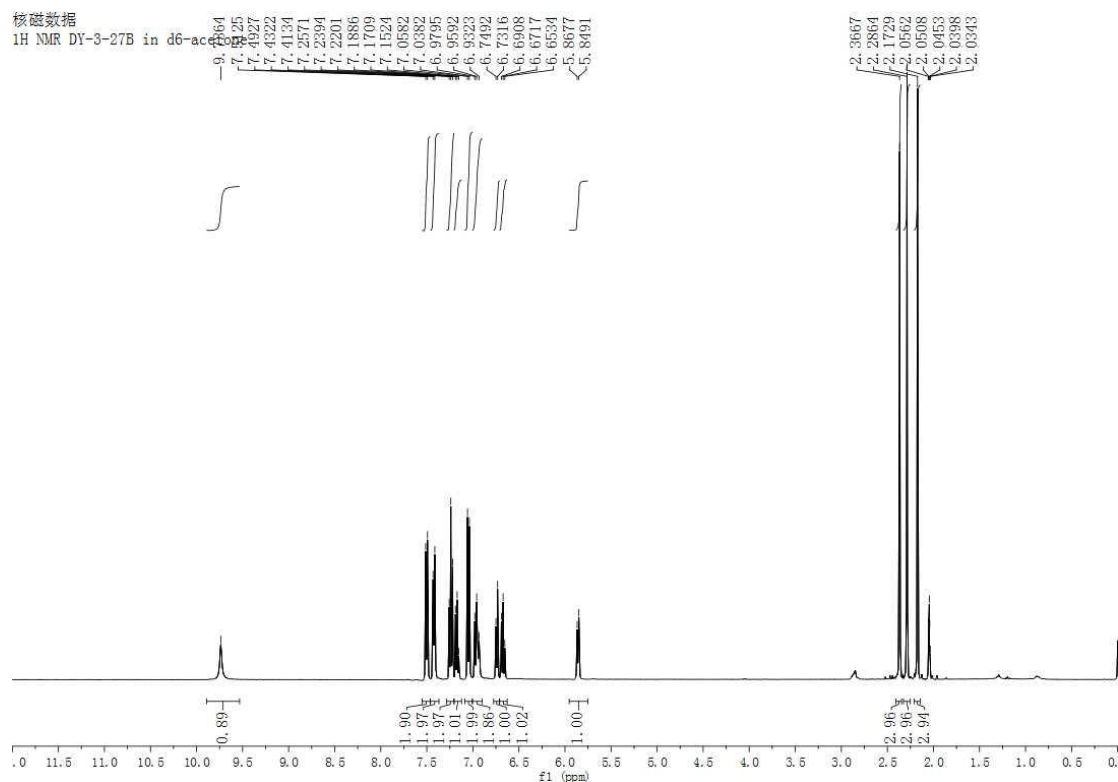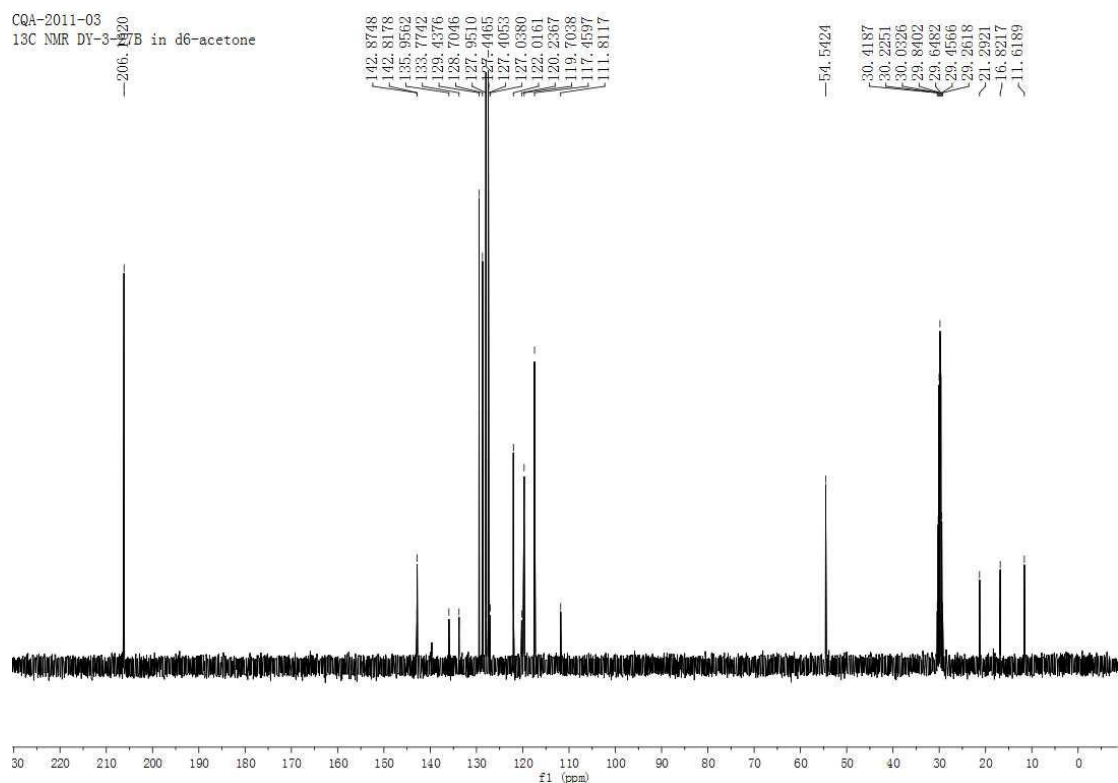

# Elemental Composition Report

Page 1

## Single Mass Analysis

Tolerance = 50.0 PPM / DBE: min = -10.0, max = 100.0

Selected filters: None

Monoisotopic Mass, Even Electron Ions

6 formula(e) evaluated with 1 results within limits (all results (up to 1000) for each mass)

Elements Used:

C: 0-100 H: 0-120 N: 2-2 O: 2-2 Na: 1-1 S: 1-1

DY-3-27B

11011717 9 (0.230) AM (Cen,6, 80.00, Ar,5000.0,429.20,0.70,LS 10); Sm (SG, 2x3.00); Sb (1,40.00); Cm (7:11)

1: TOF MS ES+  
2.37e3

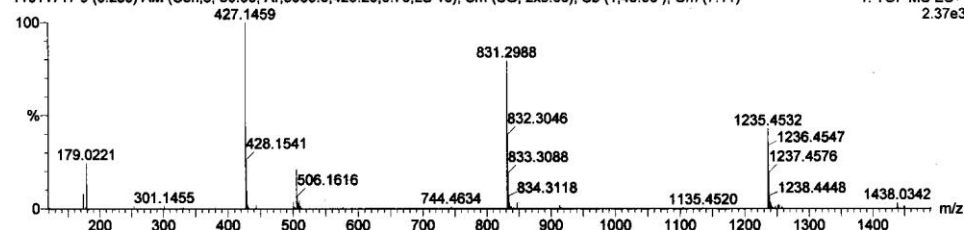

Minimum: -10.0  
Maximum: 100.0

| Mass     | Calc. Mass | mDa | PPM | DBE  | i-FIT | Formula            |
|----------|------------|-----|-----|------|-------|--------------------|
| 427.1459 | 427.1456   | 0.3 | 0.7 | 13.5 | 3.1   | C24 H24 N2 O2 Na S |

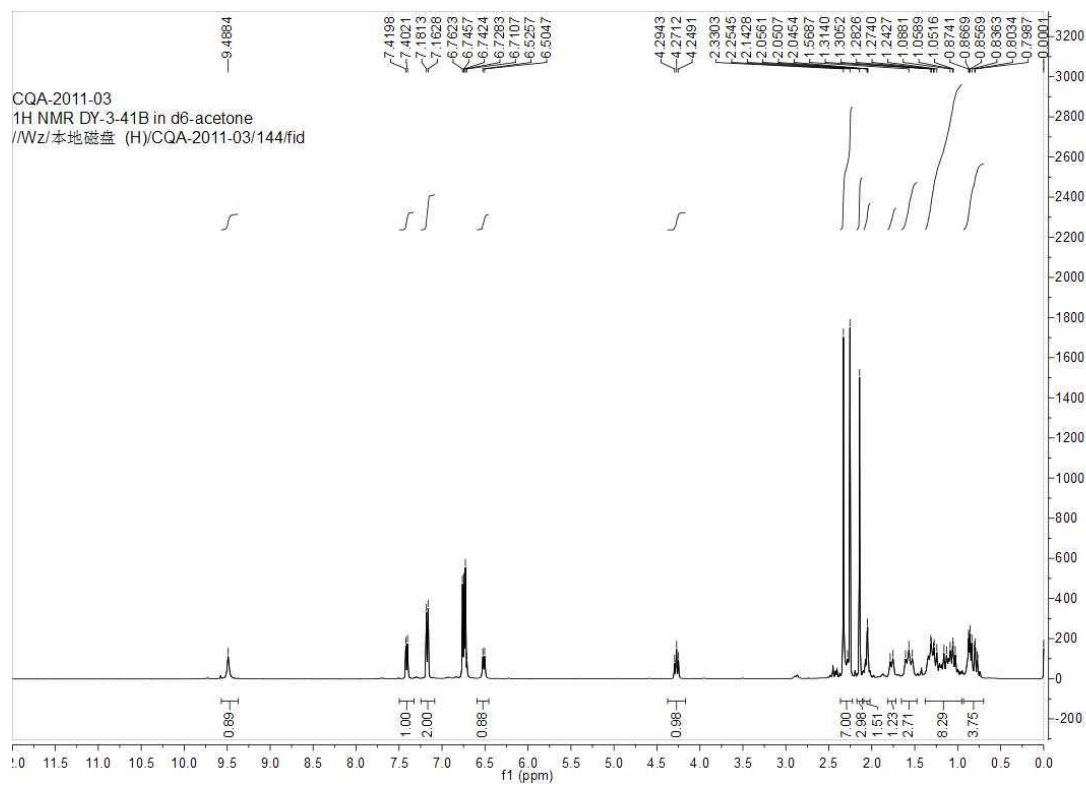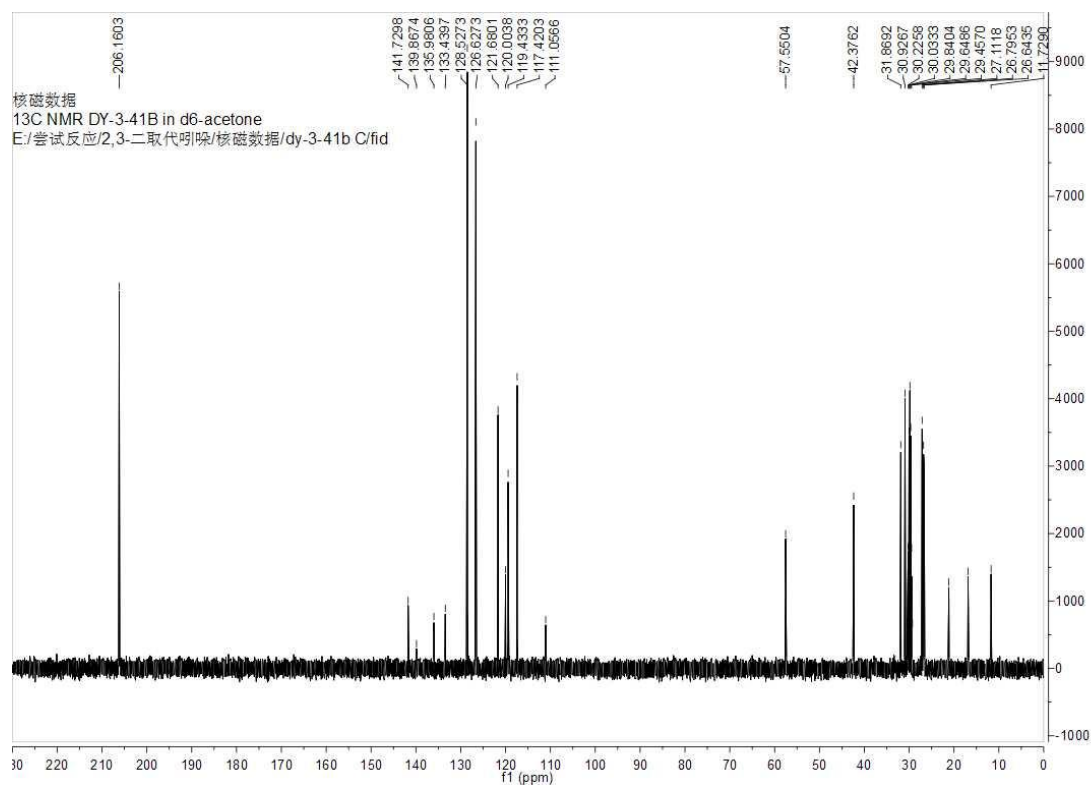

Elemental Composition Report

Page 1

Single Mass Analysis

Tolerance = 50.0 PPM / DBE: min = -10.0, max = 100.0

Selected filters: None

Monoisotopic Mass, Even Electron Ions

6 formula(e) evaluated with 1 results within limits (all results (up to 1000) for each mass)

Elements Used:

C: 0-100 H: 0-120 N: 2-2 O: 2-2 Na: 1-1 S: 1-1

DY-3-418

11011718 43 (1.112) AM (Cen,6, 80.00, Ar,5000.0,429.20,0.70,LS 10); Sm (SG, 2x3.00); Sb (1,40.00); Cm (34:44)

1: TOF MS ES+  
5.33e3

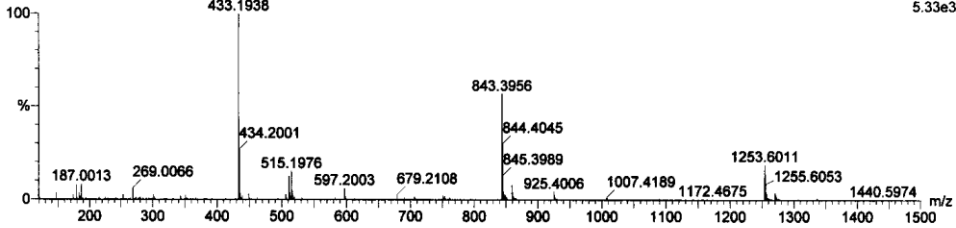

Minimum: -10.0  
Maximum: 50.0

| Mass     | Calc. Mass | mDa | PPM | DBE  | i-FIT | Formula            |
|----------|------------|-----|-----|------|-------|--------------------|
| 433.1938 | 433.1926   | 1.2 | 2.8 | 10.5 | 4.1   | C24 H30 N2 O2 Na S |

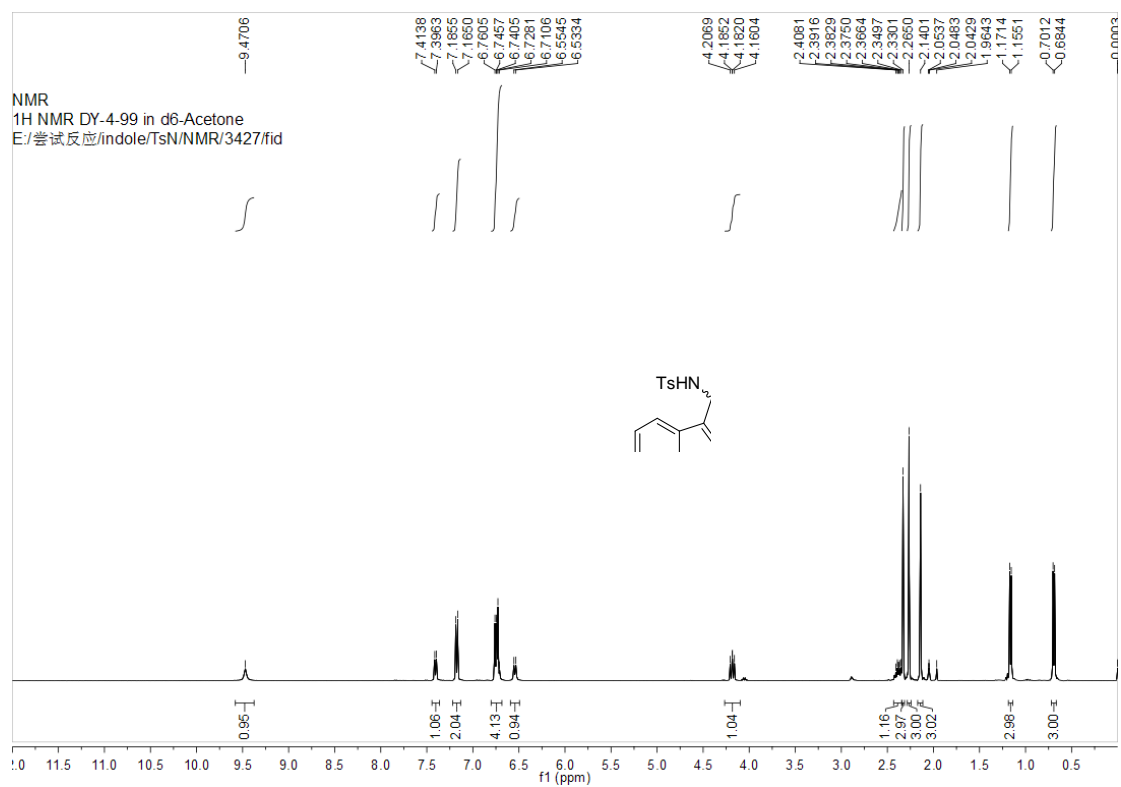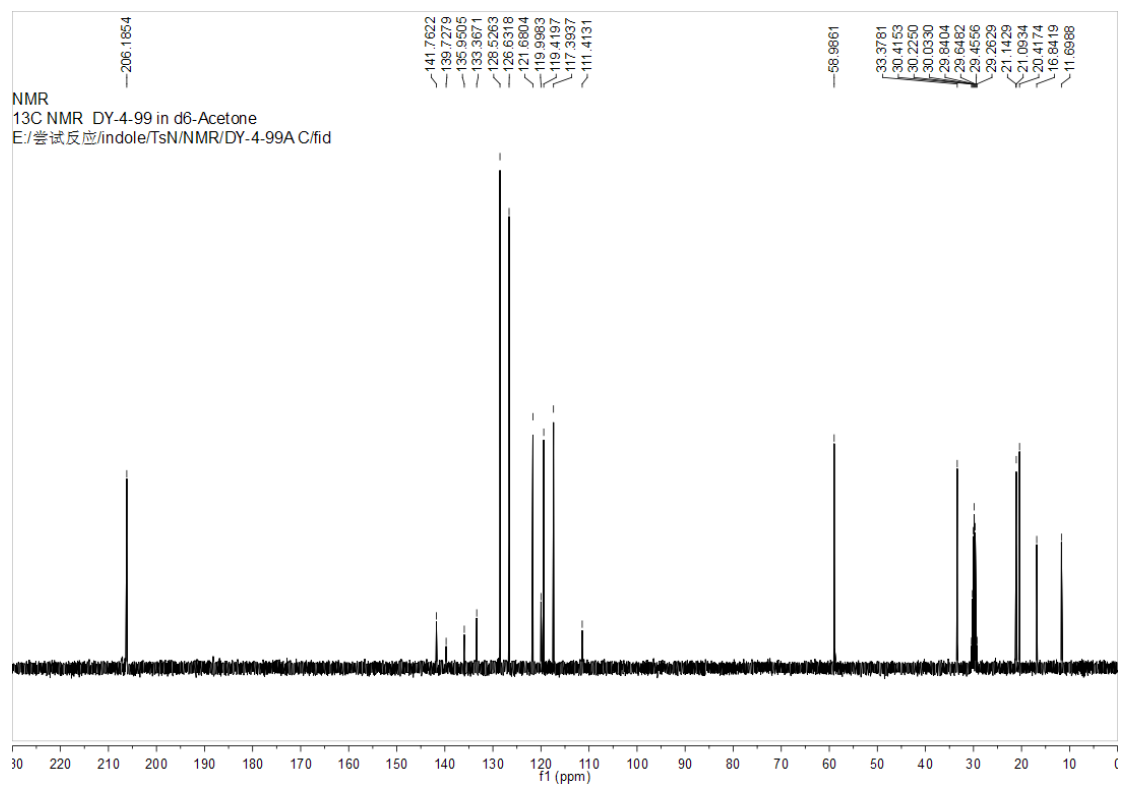

Elemental Composition Report

Page 1

Single Mass Analysis

Tolerance = 50.0 PPM / DBE: min = -10.0, max = 100.0

Selected filters: None

Monoisotopic Mass, Even Electron Ions

6 formula(e) evaluated with 1 results within limits (all results (up to 1000) for each mass)

Elements Used:

C: 0-100 H: 0-120 N: 2-2 O: 2-2 Na: 1-1 S: 1-1

DY-3-41A

11011719 17 (0.423) AM (Cen,6, 80.00, Ar,5000.0,429.20,0.70,LS 10); Sm (SG, 2x3.00); Sb (1,40.00 ); Cm (13.22)

1: TOF MS ES+  
7.96e3

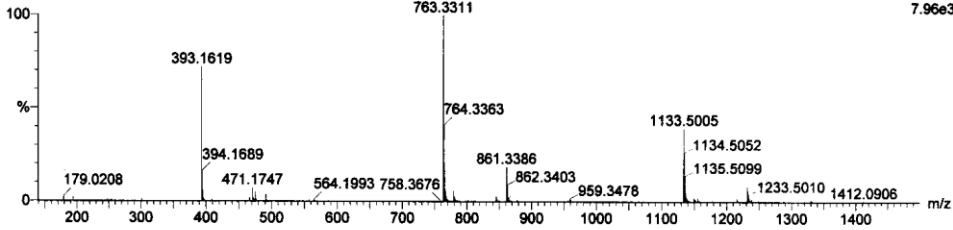

Minimum: -10.0  
Maximum: 50.0 100.0

| Mass     | Calc. Mass | mDa | PPM | DBE | i-FIT | Formula            |
|----------|------------|-----|-----|-----|-------|--------------------|
| 393.1619 | 393.1613   | 0.6 | 1.5 | 9.5 | 7.9   | C21 H26 N2 O2 Na S |

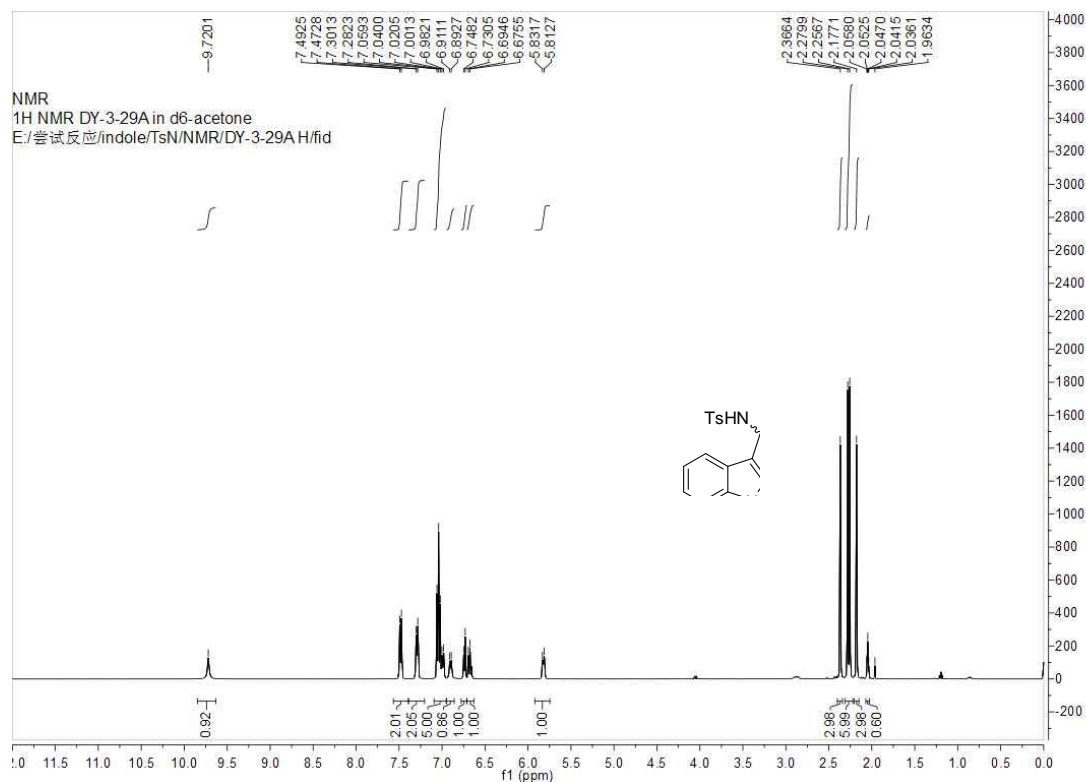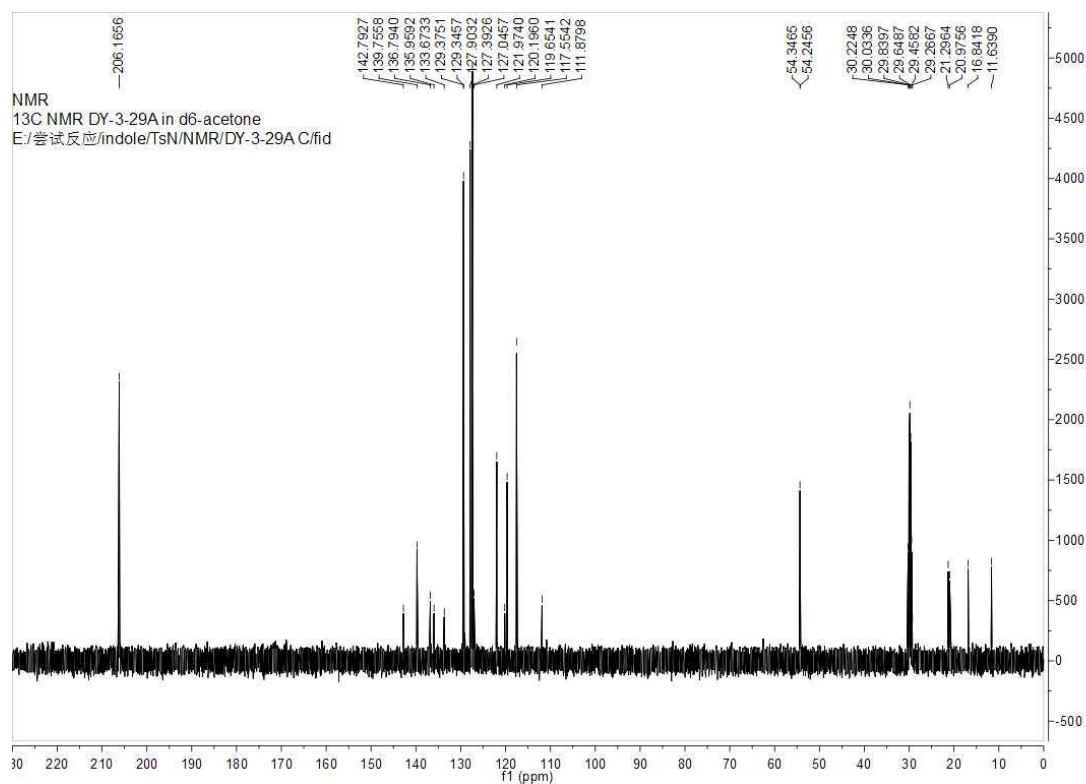

Elemental Composition Report

Page 1

Single Mass Analysis

Tolerance = 50.0 PPM / DBE: min = -10.0, max = 100.0

Selected filters: None

Monoisotopic Mass, Even Electron Ions

6 formula(e) evaluated with 1 results within limits (all results (up to 1000) for each mass)

Elements Used:

C: 0-100 H: 0-120 N: 2-2 O: 2-2 Na: 1-1 S: 1-1

DY-3-29A

11011720 41 (1.032) AM (Cen, 6, 80.00, Ar, 5000.0, 429.20, 0.70, LS 10); Sm (SG, 2x3.00); Sb (1, 40.00); Cm (38.42)

1: TOF MS ES+  
2.36e3

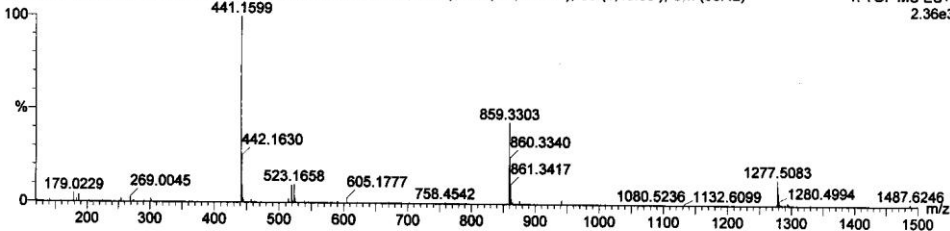

Minimum: -10.0  
Maximum: 50.0 100.0

| Mass     | Calc. Mass | mDa  | PPM  | DBE  | i-FIT | Formula            |
|----------|------------|------|------|------|-------|--------------------|
| 441.1599 | 441.1613   | -1.4 | -3.2 | 13.5 | 8.6   | C25 H26 N2 O2 Na S |

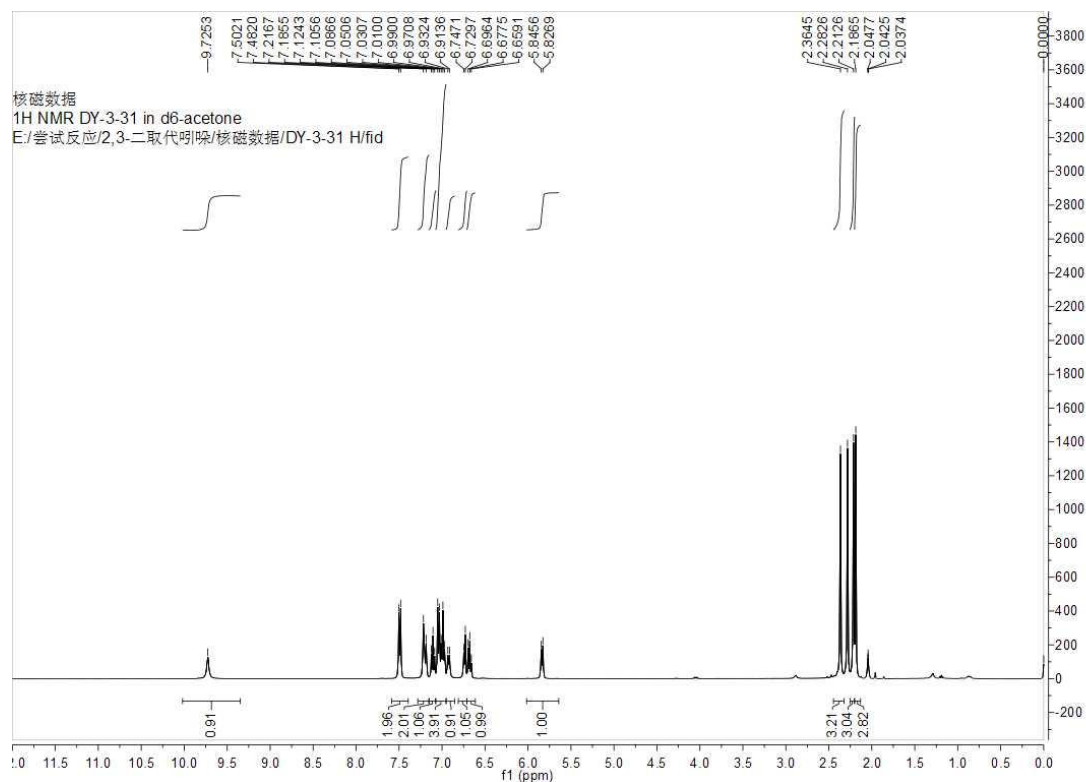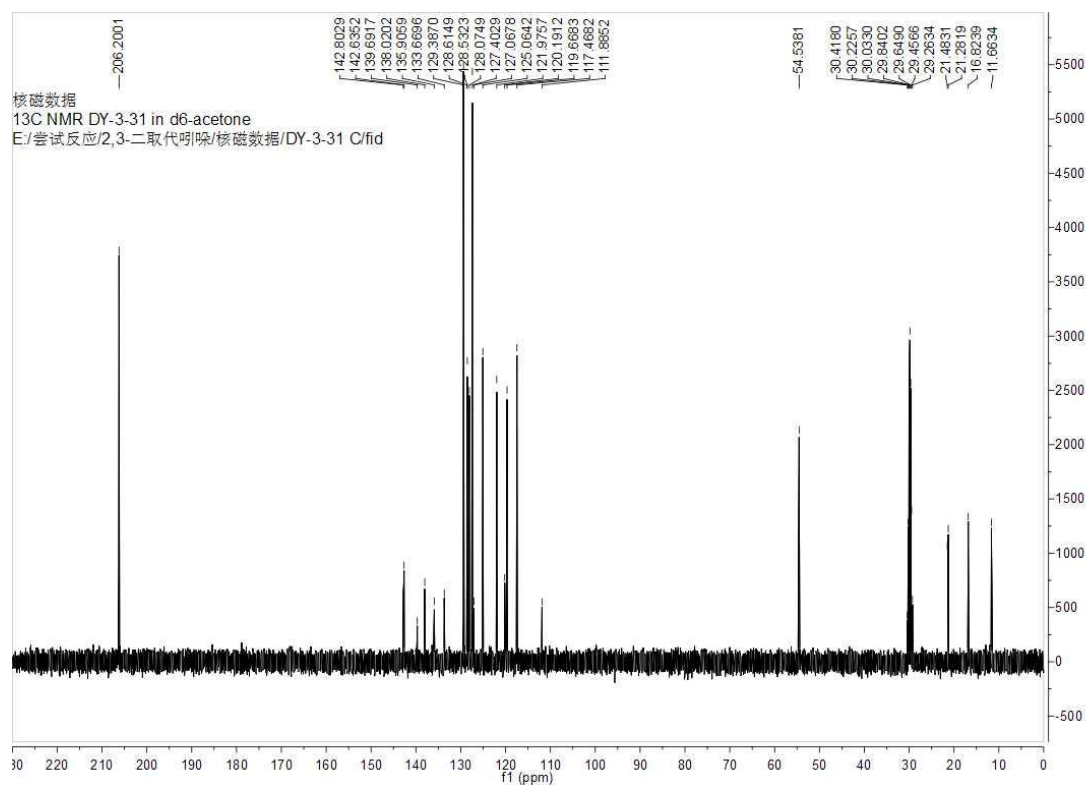

Elemental Composition Report

Page 1

Single Mass Analysis

Tolerance = 50.0 PPM / DBE: min = -10.0, max = 100.0

Selected filters: None

Monoisotopic Mass, Even Electron Ions

6 formula(e) evaluated with 1 results within limits (all results (up to 1000) for each mass)

Elements Used:

C: 0-100 H: 0-120 N: 2-2 O: 2-2 Na: 1-1 S: 1-1

DY-3-31

11011721 54 (1.360) AM (Cen, 6, 80.00, Ar, 5000.0, 429.20, 0.70, LS 10); Sm (SG, 2x3.00); Sb (1, 40.00); Cm (52:54)

1: TOF MS ES+  
1.64e3

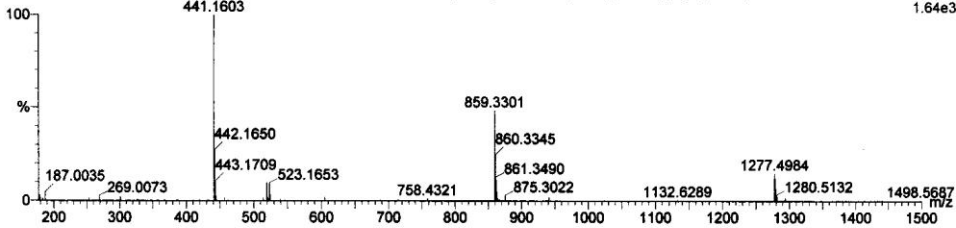

Minimum: -10.0  
Maximum: 5.0 50.0 100.0

| Mass     | Calc. Mass | mDa  | PPM  | DBE  | i-FIT | Formula            |
|----------|------------|------|------|------|-------|--------------------|
| 441.1603 | 441.1613   | -1.0 | -2.3 | 13.5 | 3.6   | C25 H26 N2 O2 Na S |

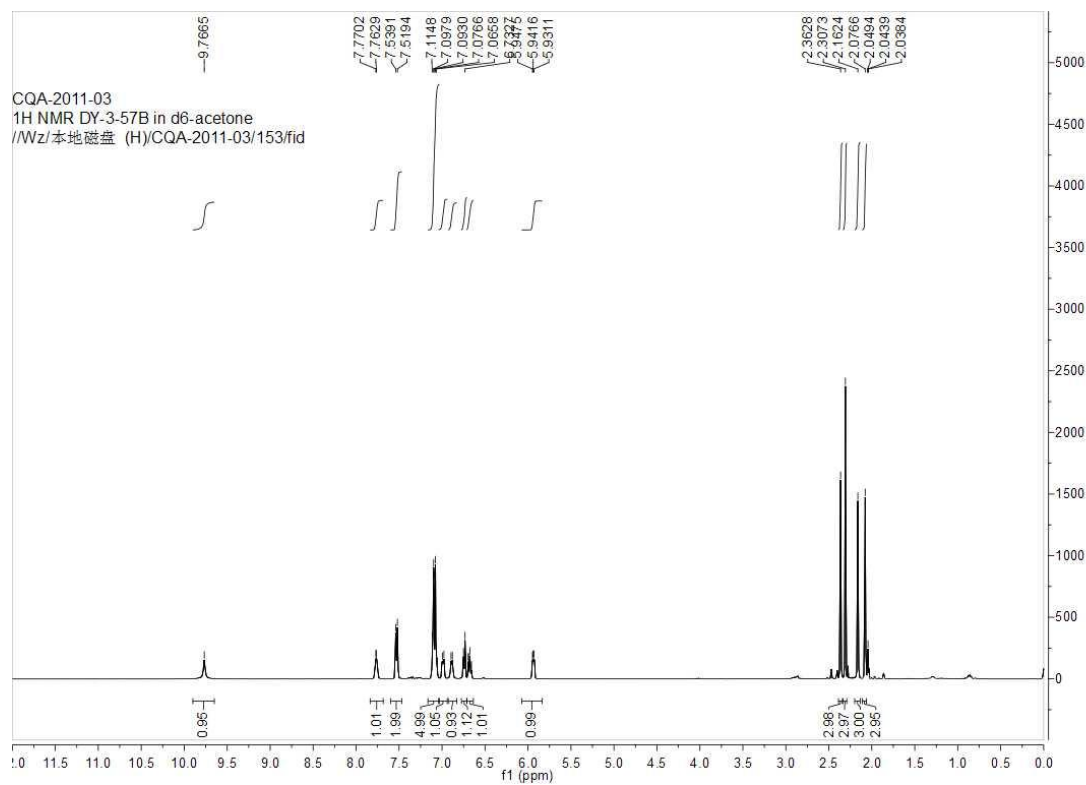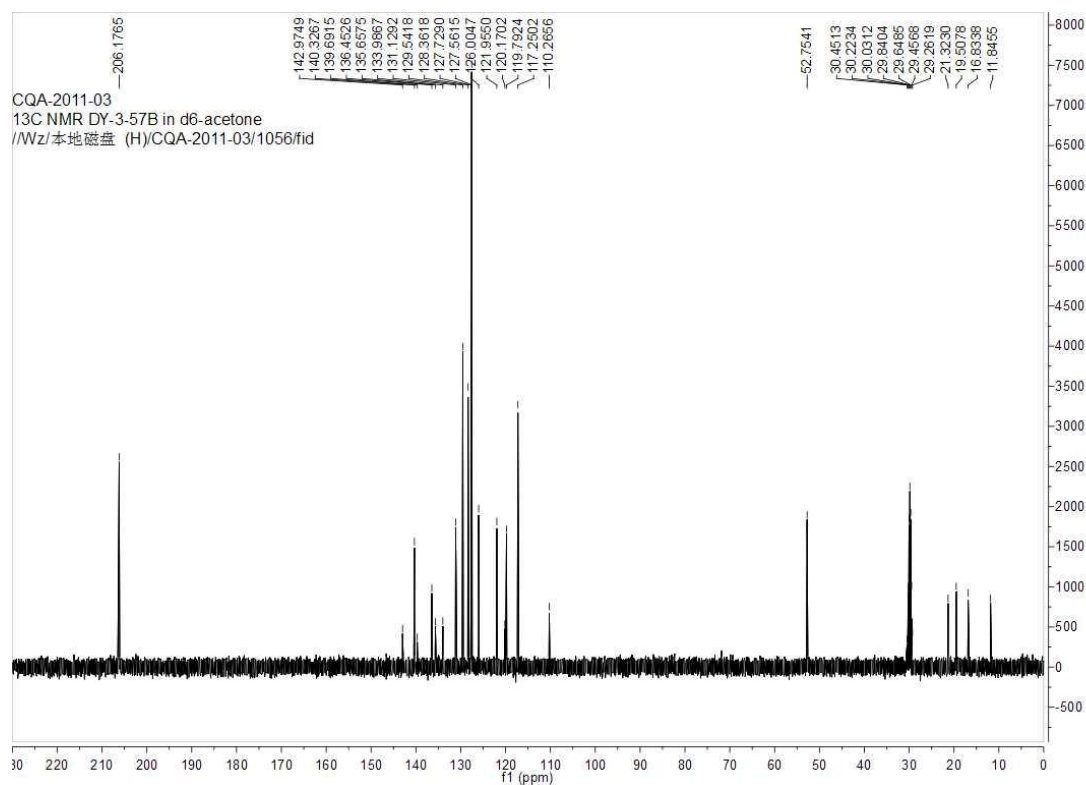

# Elemental Composition Report

Page 1

## Single Mass Analysis

Tolerance = 50.0 PPM / DBE: min = -10.0, max = 100.0

Selected filters: None

Monoisotopic Mass, Even Electron Ions

6 formula(e) evaluated with 1 results within limits (all results (up to 1000) for each mass)

Elements Used:

C: 0-100 H: 0-120 N: 2-2 O: 2-2 Na: 1-1 S: 1-1

DY-3-57B

11011722 8 (0.213) AM (Cen,6, 80.00, Ar,5000.0,429.20,0.70,LS 10); Sm (SG, 2x3.00); Sb (1,40.00 ); Cm (1:11)

1: TOF MS ES+  
6.10e3

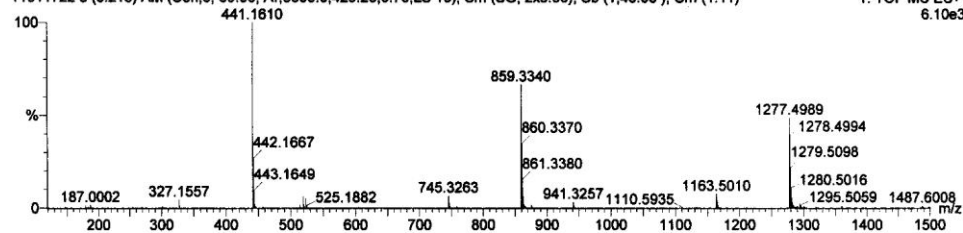

Minimum: -10.0  
Maximum: 100.0

| Mass     | Calc. Mass | mDa  | PPM  | DBE  | i-FIT | Formula            |
|----------|------------|------|------|------|-------|--------------------|
| 441.1610 | 441.1613   | -0.3 | -0.7 | 13.5 | 9.2   | C25 H26 N2 O2 Na S |

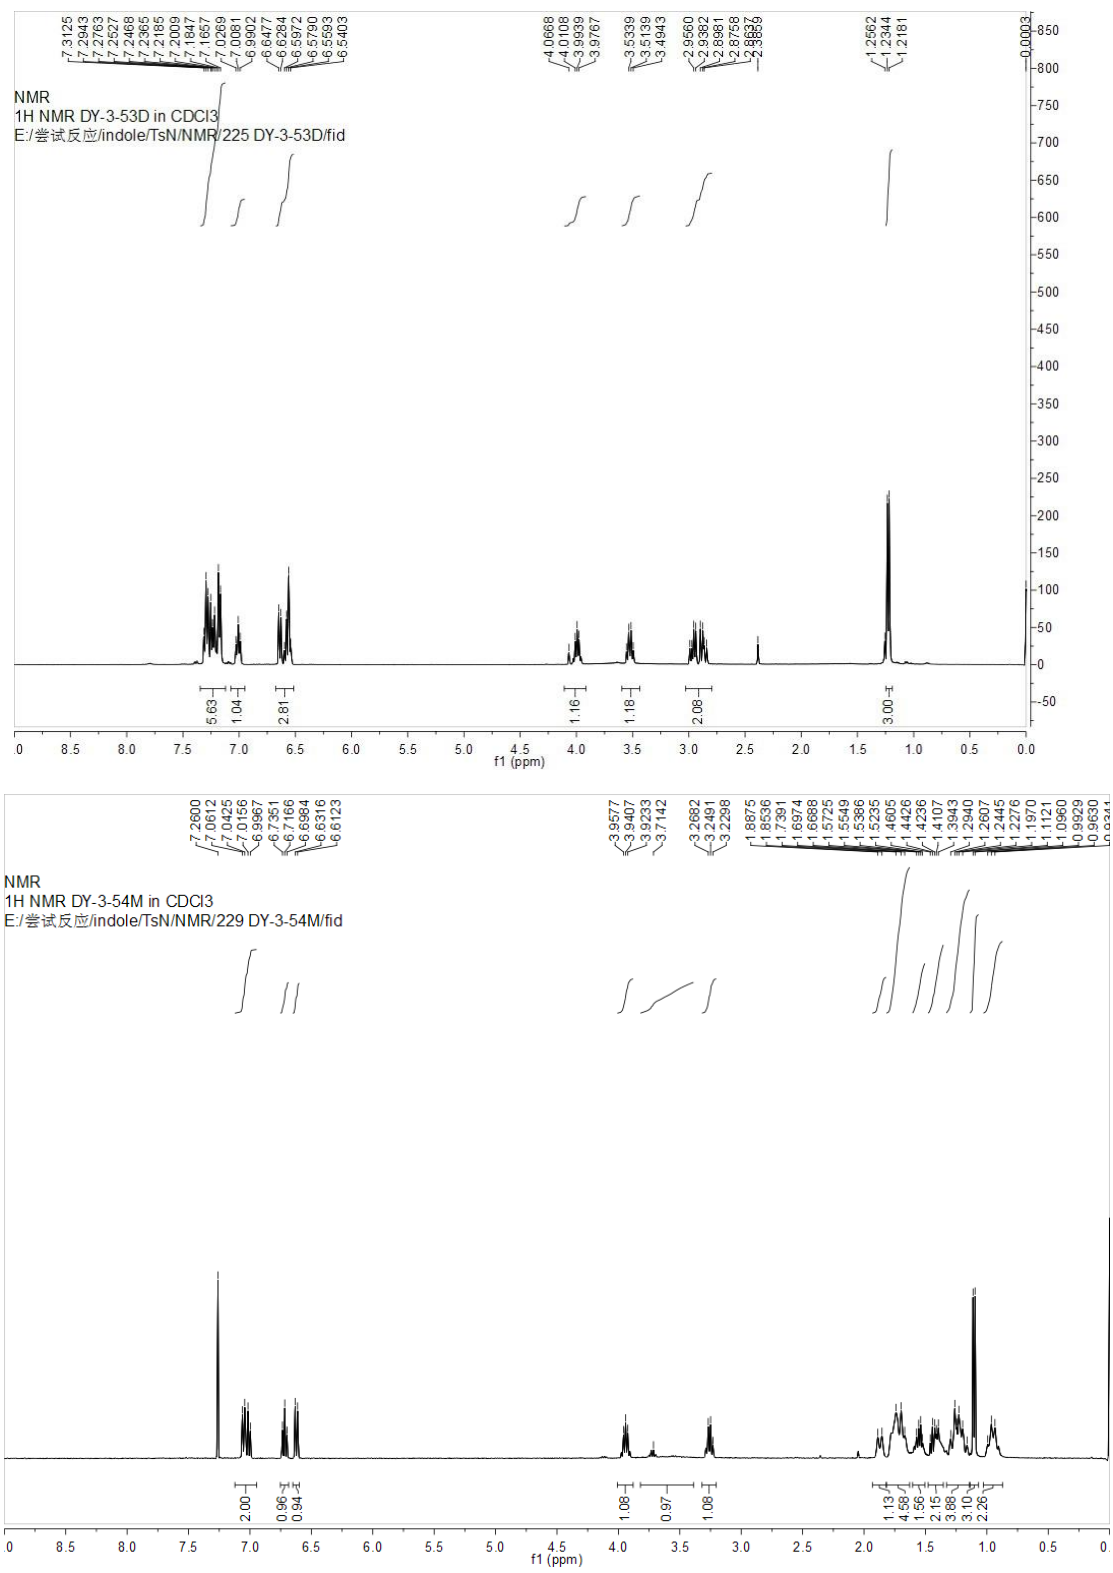

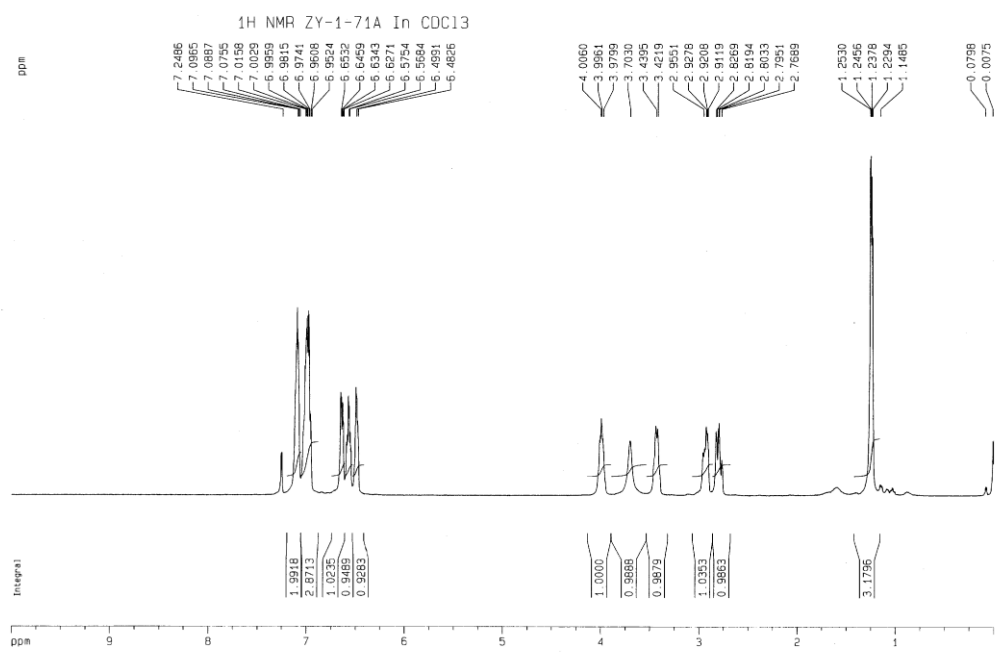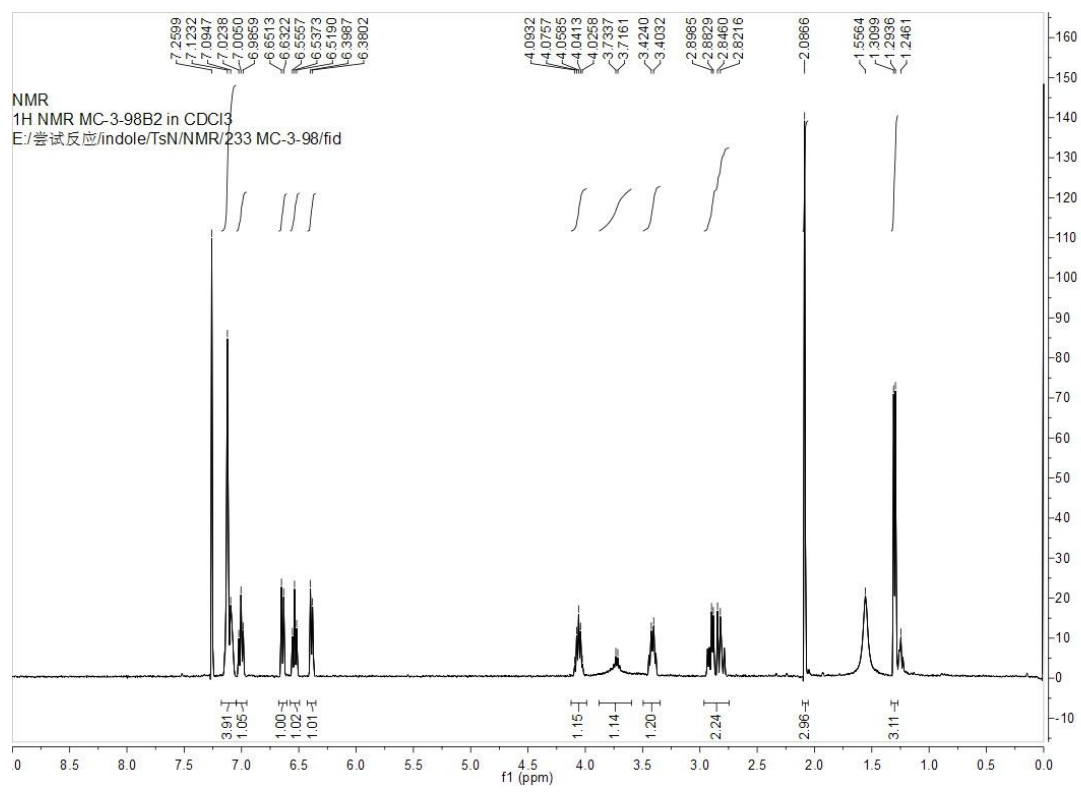

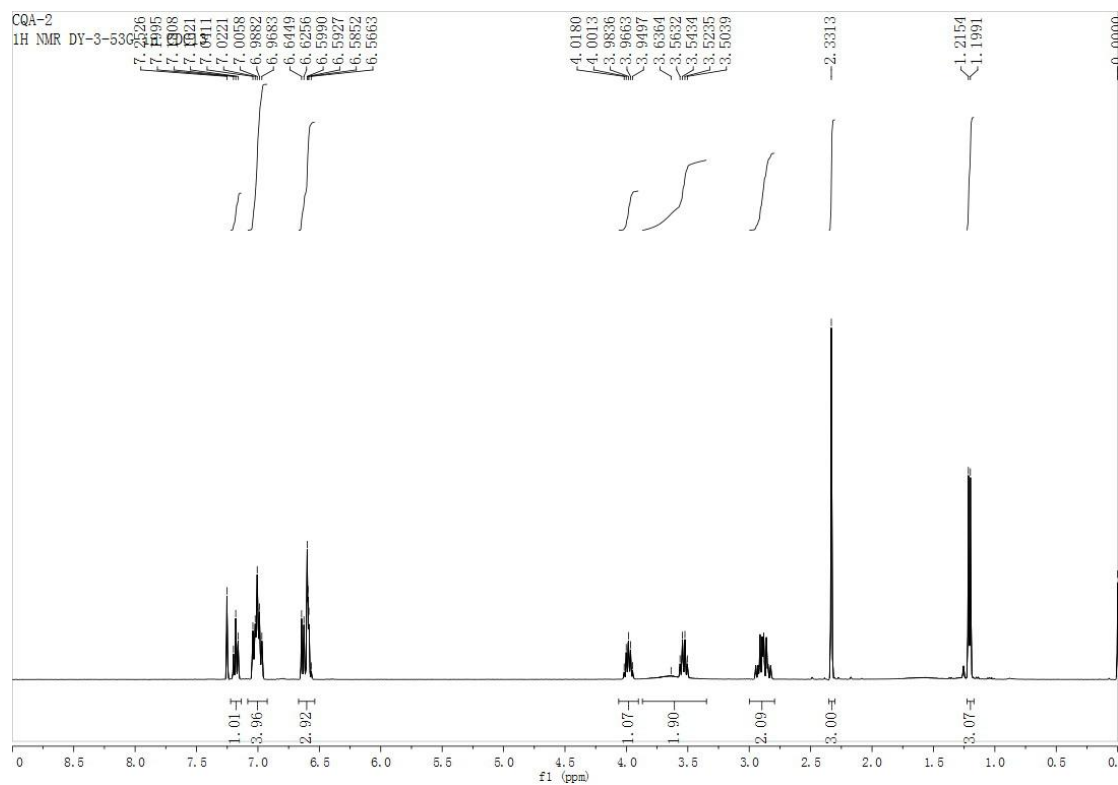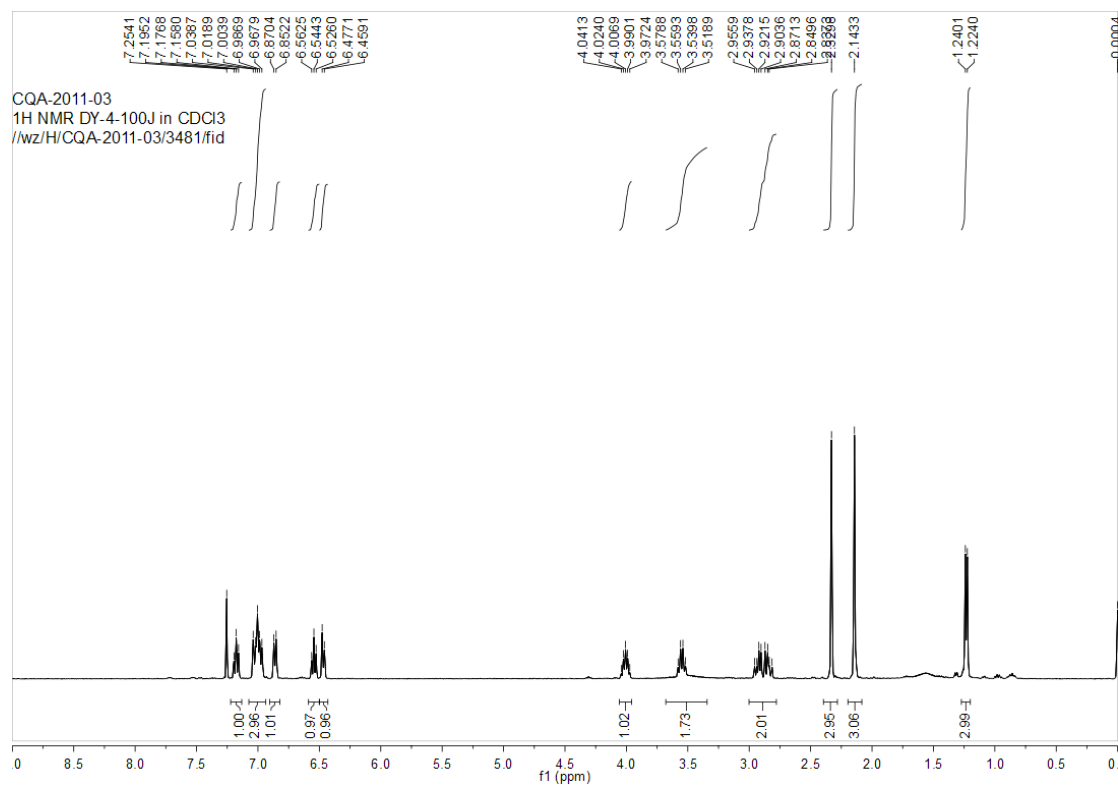

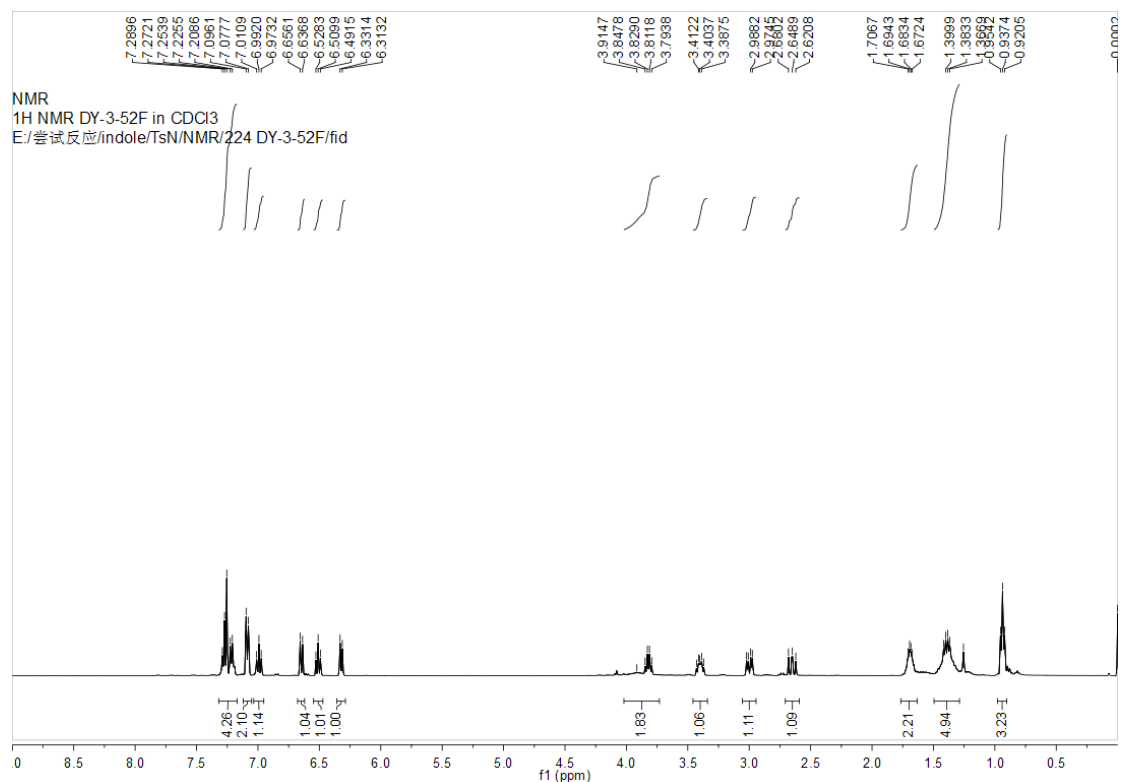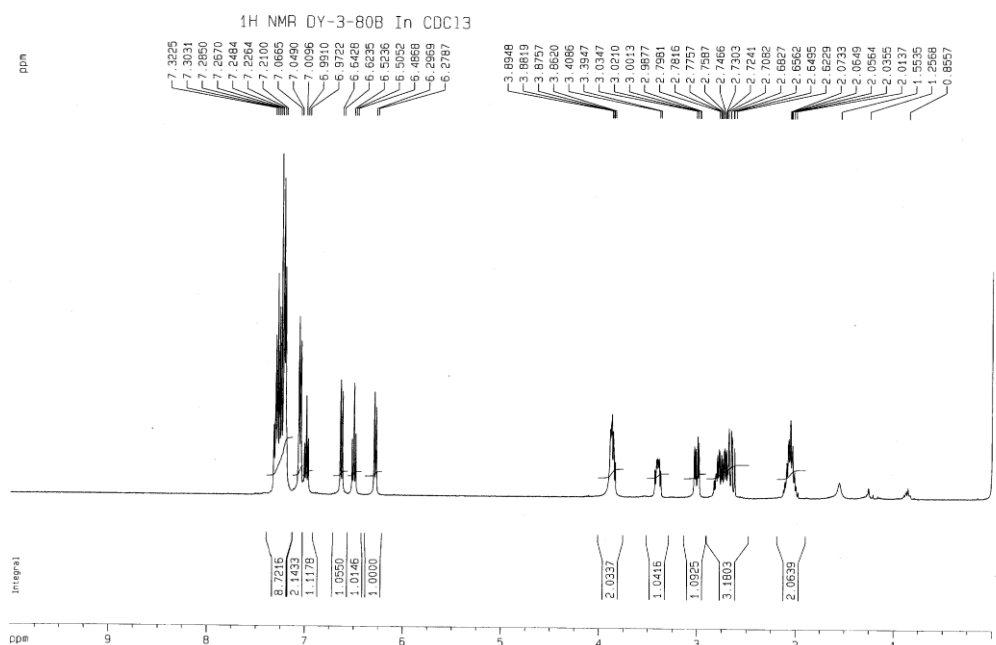

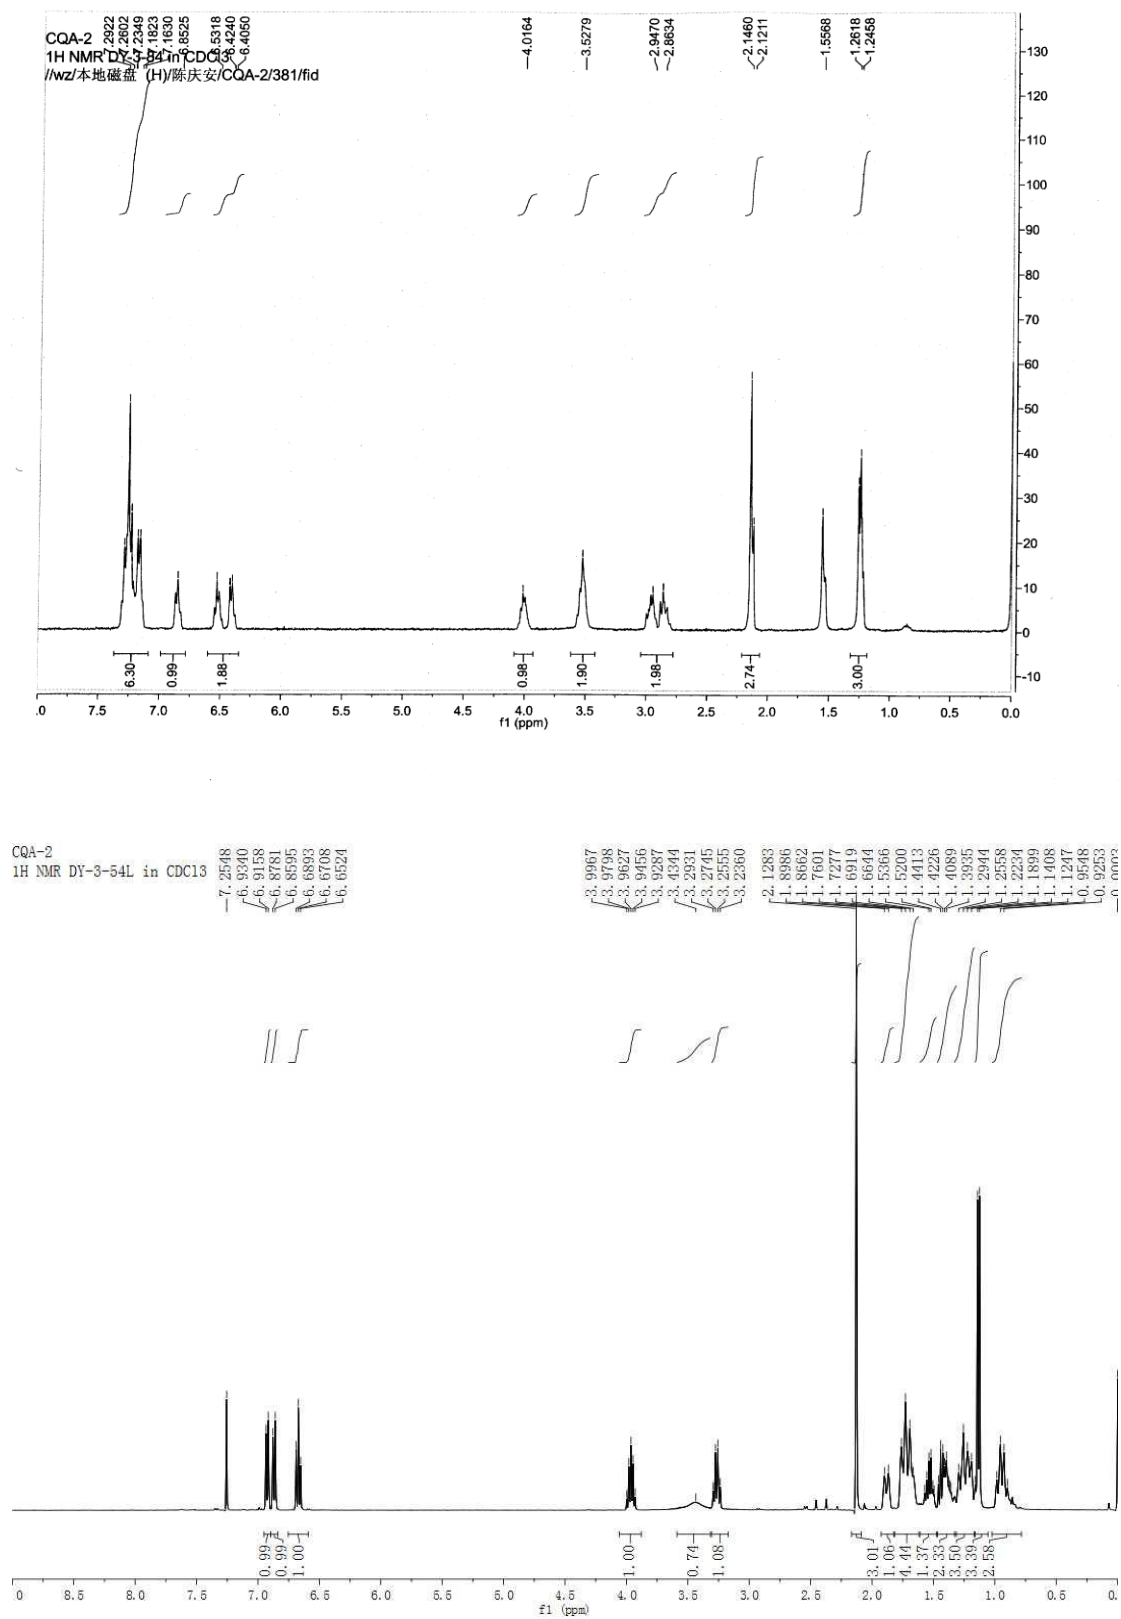

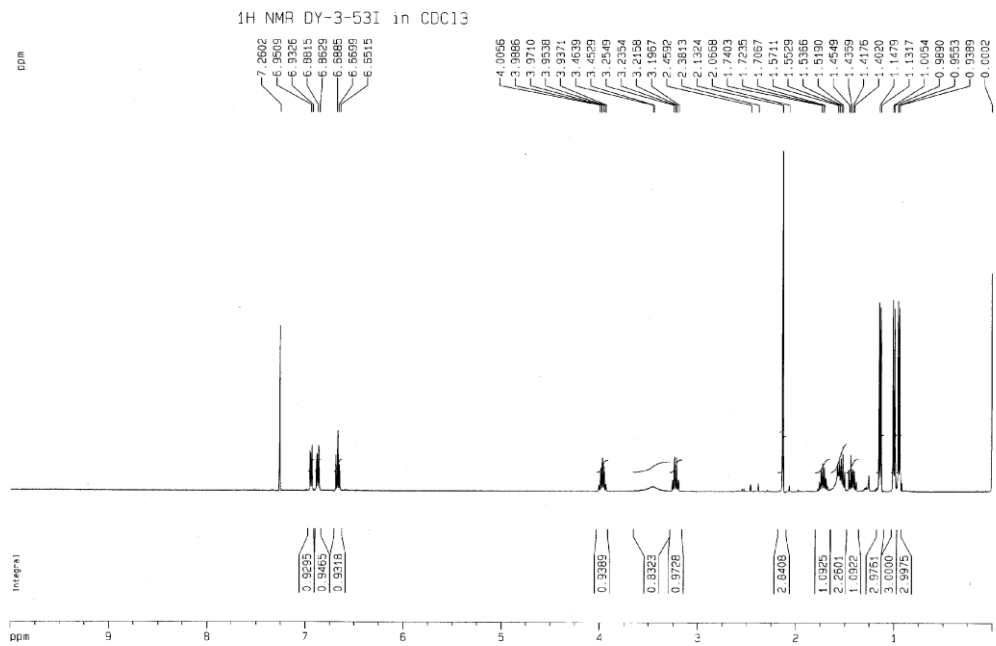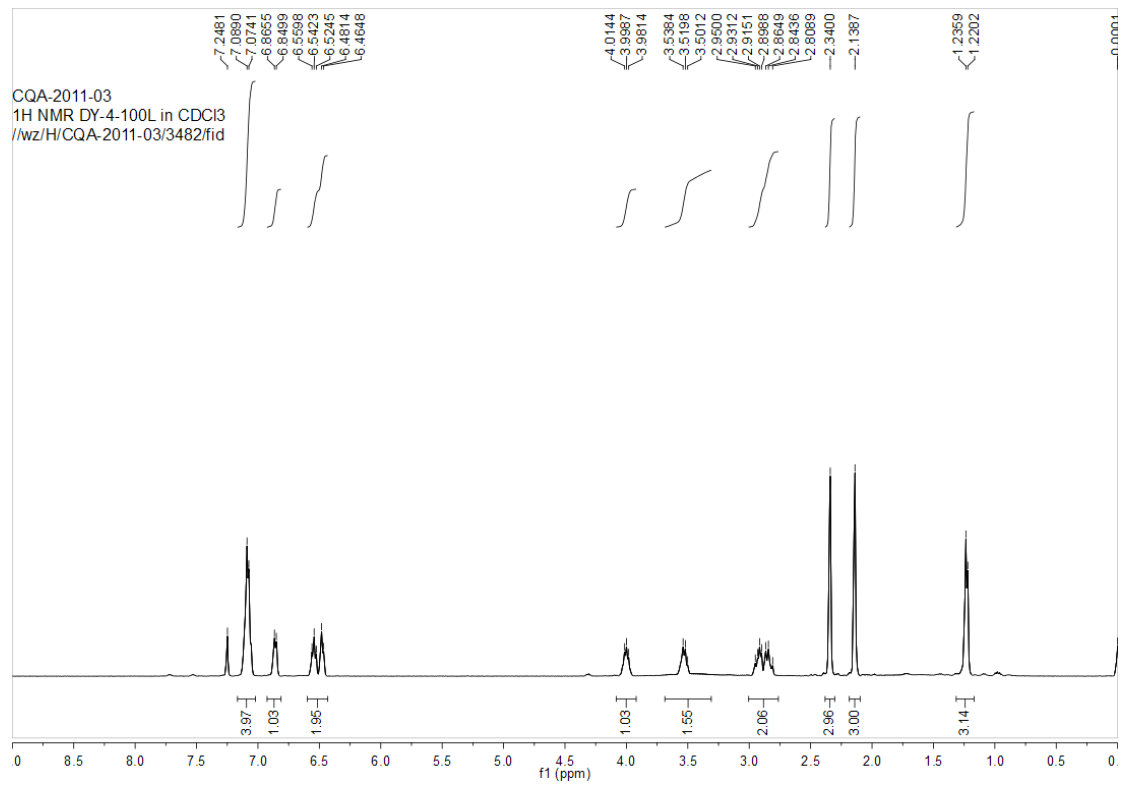

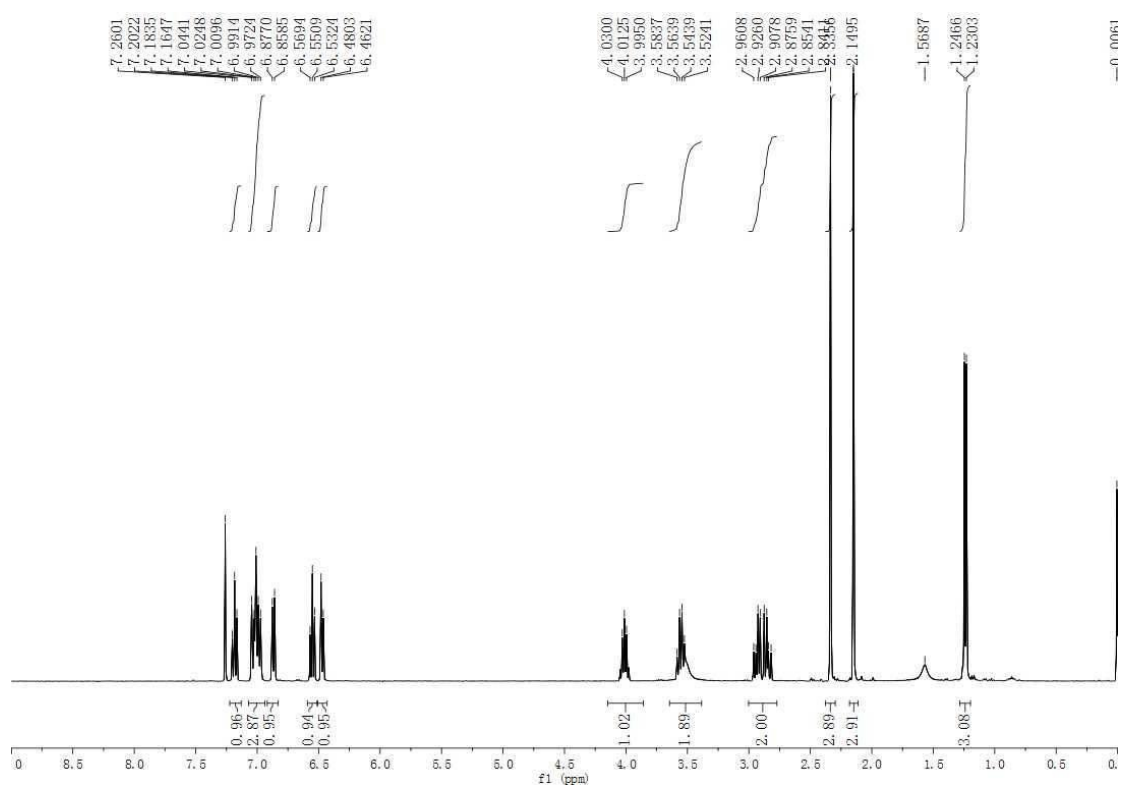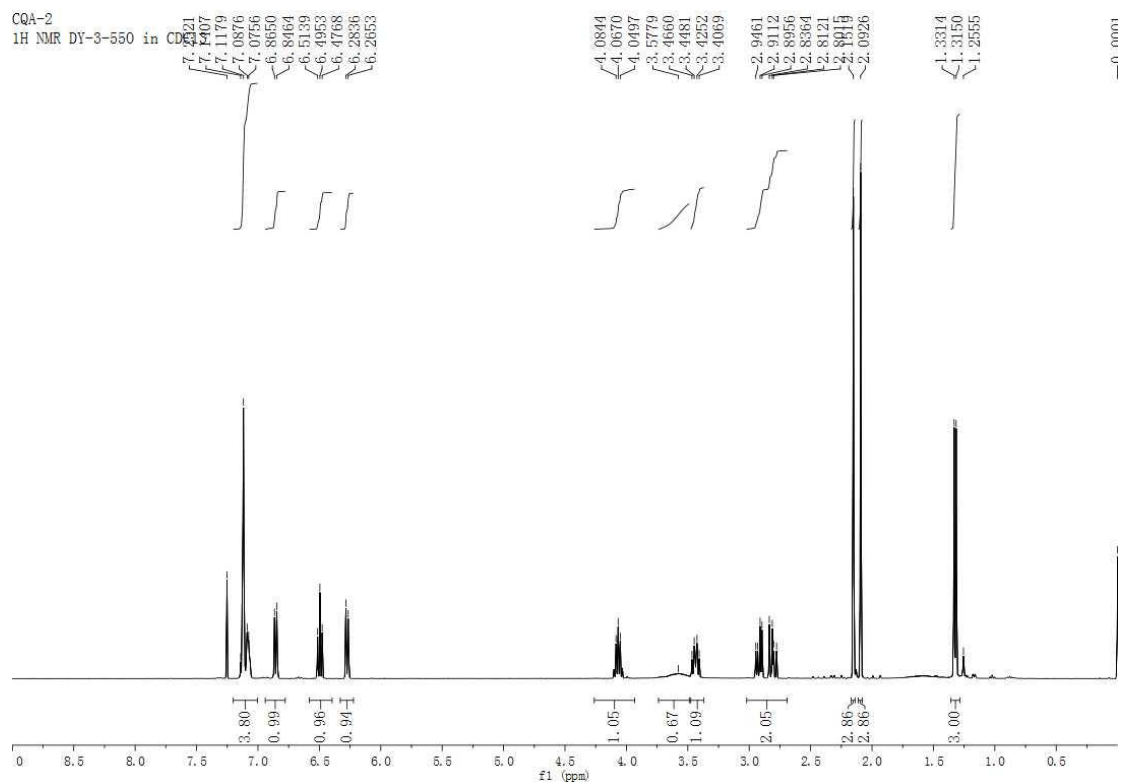

## 9. Copy of HPLC for Racemic and Chiral Compounds

Data File C:\HPCHEM\1\DATA\ZHOU-11\YZ000772.D  
0J-H, H/i-PrOH = 80/20, 1.0 mL/min, 30 oC, 254 nm

Sample Name: DY-4-93A+-

Data File C:\HPCHEM\1\DATA\ZHOU-11\YZ000690.D  
OJ-H, H<sub>2</sub>O-PrOH = 80/20, 1.0 mL/min, 30 oC, 254 nm

Sample Name: DY-4-94A

```
=====
Injection Date   : 9/1/2011 4:21:49 PM
Sample Name     : PY-4-93A+-
Location        : Vial 1
Accr. Operator  : ZX
Accr. Method    : C:\HPCHEM\1\METHODS\SUW.M
Last changed    : 9/1/2011 4:17:12 PM by ZX
                  (modified after loading)
Analysis Method : C:\HPCHEM\1\METHODS\SUW.M
Last changed    : 9/8/2011 4:18:55 by ZX
                  (modified after loading)
=====
```

```
=====
Injection Date : 8/20/2011 5:00:59 PM
Sample Name : D1-4-94A
Acq. Operator : ZX
Acq. Method : C:\HPCHEM\1\METHODS\SW.M
Last changed : 8/20/2011 4:52:07 PM by ZX
              (modified after loading)
Analysis Method : C:\HPCHEM\1\METHODS\SW.M
Last changed : 9/8/2011 4:59:11 PM by ZX
              (modified after load)
=====
```

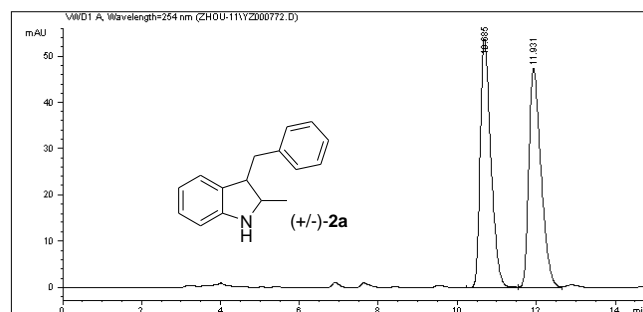

=====  
Area Percent Report

```
Sorted By      :      Signal
Multiplier    :      1.0000
Dilution      :      1.0000
```

Signal 1: VWD1 A, Wavelength=254 nm

| Peak # | RetTime [min] | Type | Width [min] | Area mAU   | *s | Height [mAU] | Area %  |
|--------|---------------|------|-------------|------------|----|--------------|---------|
| 1      | 10.685        | VV   | 0.2816      | 1007.65271 |    | 53.69359     | 49.8822 |
| 2      | 11.931        | VV   | 0.3219      | 1012.41113 |    | 47.42553     | 50.1178 |

|          |            |           |
|----------|------------|-----------|
| Totals : | 2020.06384 | 101.11912 |
|----------|------------|-----------|

Results obtained with enhanced integrator!

\*\*\* End of Report \*\*\*

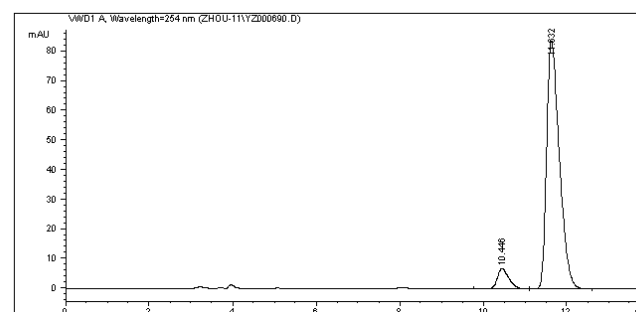

=====  
Area Percent Report

```
Sorted By      :      Signal
Multiplier    :      1.0000
Dilution      :      1.0000
```

Signal 1: VWD1 A, Wavelength=254 nm

| Peak<br># | RetTime<br>[min] | Type | Width<br>[min] | Area<br>mAU *s | Height<br>[mAU] | Area<br>% |
|-----------|------------------|------|----------------|----------------|-----------------|-----------|
| 1         | 10.446           | VV   | 0.2845         | 128.01347      | 6.72928         | 6.7449    |
| 2         | 11.632           | VV   | 0.3230         | 1769.90918     | 83.50908        | 93.2551   |

|          |            |          |
|----------|------------|----------|
| Totals : | 1897.92265 | 90.23836 |
|----------|------------|----------|

Results obtained with enhanced integrator!

\*\*\* End of Report \*\*\*

Data File C:\CHEM32\1\DATA\ZHOU-11\YZN000729.D  
Sample Name: DY-4-93B+-

=====

Acq. Operator : Instrument 1 Location : Vial 1  
Injection Date : 8/20/2011 4:33:50 PM  
Acq. Method : C:\CHEM32\1\METHODS\SW.M  
Last changed : 8/20/2011 4:31:04 PM  
(modified after loading)  
Analysis Method : C:\CHEM32\1\METHODS\SW.M  
Last changed : 9/8/2011 4:53:55 PM  
(modified after loading)  
Sample Info : OD-H, H/1-PrOH = 99/1, 1.0 mL/min, 30 oC, 254 nm

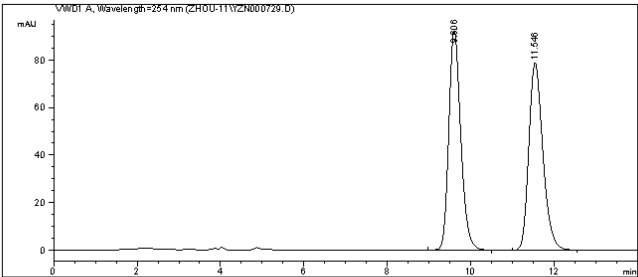

=====

Area Percent Report

=====

Sorted By : Signal  
Multiplier: : 1.0000  
Dilution: : 1.0000  
Use Multiplier & Dilution Factor with ISTDs

Signal 1: VWD1 A, Wavelength=254 nm

| Peak # | RetTime [min] | Type | Width [min] | Area mAU   | Height *s [mAU] | Area %  |
|--------|---------------|------|-------------|------------|-----------------|---------|
| 1      | 9.606         | BB   | 0.3066      | 1839.55408 | 92.37290        | 49.9279 |
| 2      | 11.546        | BB   | 0.3606      | 1844.86646 | 78.76810        | 50.0721 |

Totals : 3684.42053 171.14101

=====

\*\*\* End of Report \*\*\*

Data File C:\CHEM32\1\DATA\ZHOU-11\YZN000728.D  
Sample Name: DY-4-93B

=====

Acq. Operator : Instrument 1 Location : Vial 1  
Injection Date : 8/20/2011 4:16:25 PM  
Acq. Method : C:\CHEM32\1\METHODS\SW.M  
Last changed : 8/20/2011 4:13:39 PM  
(modified after loading)  
Analysis Method : C:\CHEM32\1\METHODS\SW.M  
Last changed : 9/8/2011 4:53:55 PM  
(modified after loading)  
Sample Info : OD-H, H/1-PrOH = 99/1, 1.0 mL/min, 30 oC, 254 nm

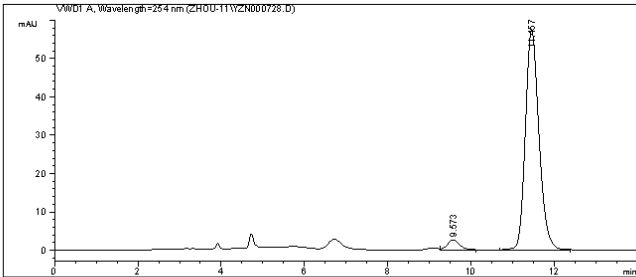

=====

Area Percent Report

=====

Sorted By : Signal  
Multiplier: : 1.0000  
Dilution: : 1.0000  
Use Multiplier & Dilution Factor with ISTDs

Signal 1: VWD1 A, Wavelength=254 nm

| Peak # | RetTime [min] | Type | Width [min] | Area mAU   | Height *s [mAU] | Area %  |
|--------|---------------|------|-------------|------------|-----------------|---------|
| 1      | 9.573         | VB   | 0.3120      | 52.59864   | 2.58156         | 3.8950  |
| 2      | 11.573        | BB   | 0.3491      | 1297.82605 | 57.21106        | 96.1050 |

Totals : 1350.42469 59.79262

=====

\*\*\* End of Report \*\*\*

Data File C:\HPCHEM\1\DATA\ZHOU-11\YZ000768.D  
0J-H, H/i-PrOH = 90/10, 1.0 mL/min, 30 oC, 254 nm

Sample Name: DY-4-94C+-

=====

Injection Date : 9/1/2011 2:35:28 PM  
Sample Name : DY-4-94C+- Location : Vial 1  
Acq. Operator : ZX  
Acq. Method : C:\HPCHEM\1\METHODS\SW.M  
Last changed : 9/1/2011 1:57:34 PM by ZX  
(modified after loading)  
Analysis Method : C:\HPCHEM\1\METHODS\SW.M  
Last changed : 9/8/2011 4:44:46 PM by ZX  
(modified after loading)

=====

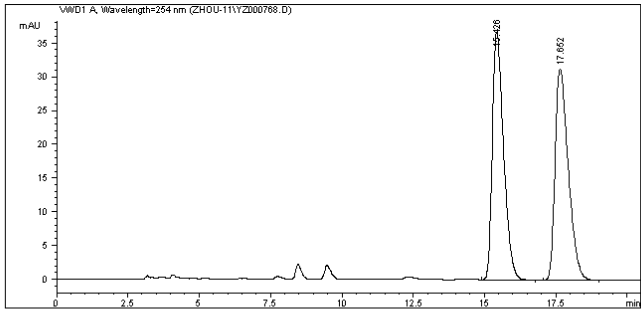

=====

Area Percent Report

=====

Sorted By : Signal  
Multiplier : 1.0000  
Dilution : 1.0000

Signal 1: VWD1 A, Wavelength=254 nm

| Peak # | RetTime [min] | Type | Width [min] | Area mAU*s | Height [mAU] | Area %  |
|--------|---------------|------|-------------|------------|--------------|---------|
| 1      | 15.426        | VB   | 0.4141      | 1004.84381 | 36.70139     | 50.0372 |
| 2      | 17.652        | VB   | 0.4855      | 1003.35028 | 31.34911     | 49.9628 |

Totals : 2008.19409 68.05049

Results obtained with enhanced integrator!

=====

\*\*\* End of Report \*\*\*

Instrument 1 9/8/2011 4:44:56 PM ZX

Page 1 of 1

Data File C:\HPCHEM\1\DATA\ZHOU-11\YZ000687.D  
0J-H, H/i-PrOH = 90/10, 1.0 mL/min, 30 oC, 254 nm

Sample Name: DY-4-94C

=====

Injection Date : 8/20/2011 3:51:35 PM  
Sample Name : DY-4-94C Location : Vial 1  
Acq. Operator : ZX  
Acq. Method : C:\HPCHEM\1\METHODS\SW.M  
Last changed : 8/20/2011 3:39:50 PM by ZX  
(modified after loading)  
Analysis Method : C:\HPCHEM\1\METHODS\SW.M  
Last changed : 9/8/2011 4:44:09 PM by ZX  
(modified after loading)

=====

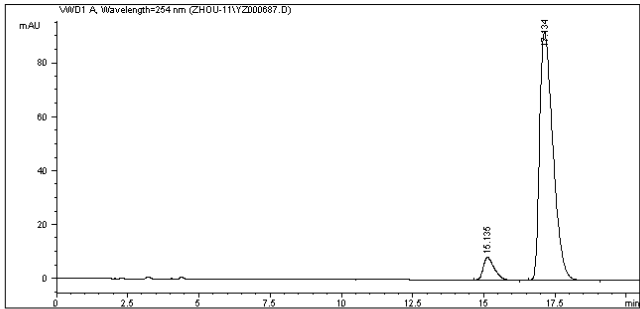

=====

Area Percent Report

=====

Sorted By : Signal  
Multiplier : 1.0000  
Dilution : 1.0000

Signal 1: VWD1 A, Wavelength=254 nm

| Peak # | RetTime [min] | Type | Width [min] | Area mAU*s | Height [mAU] | Area %  |
|--------|---------------|------|-------------|------------|--------------|---------|
| 1      | 15.135        | VV   | 0.4039      | 219.80634  | 8.29121      | 6.8821  |
| 2      | 17.134        | VB   | 0.5013      | 2974.05859 | 91.90074     | 93.1179 |

Totals : 3193.86493 100.19195

Results obtained with enhanced integrator!

=====

\*\*\* End of Report \*\*\*

Instrument 1 9/8/2011 4:44:12 PM ZX

Page 1 of 1

Data File C:\HPCHEM\1\DATA\ZHOU-11\YZ000769.D  
0J-H, H/i-PrOH = 90/10, 1.0 mL/min, 30 oC, 254 nm

Sample Name: DY-4-94D+-

=====

Injection Date : 9/1/2011 3:00:55 PM  
Sample Name : DY-4-94D+- Location : Vial 1  
Acq. Operator : ZX  
Acq. Method : C:\HPCHEM\1\METHODS\SW.M  
Last changed : 9/1/2011 2:57:41 PM by ZX  
(modified after loading)  
Analysis Method : C:\HPCHEM\1\METHODS\SW.M  
Last changed : 9/8/2011 4:49:15 PM by ZX  
(modified after loading)

=====

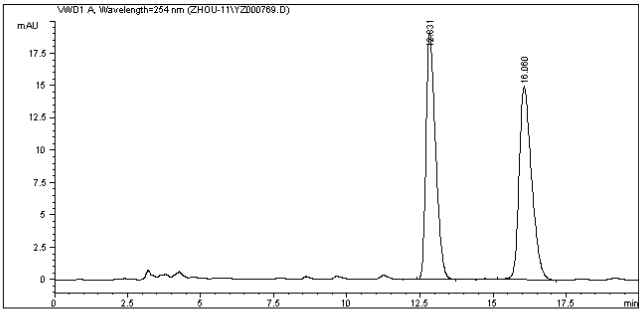

=====

Area Percent Report

=====

Sorted By : Signal  
Multiplier : 1.0000  
Dilution : 1.0000

Signal 1: VWD1 A, Wavelength=254 nm

| Peak # | RetTime [min] | Type | Width [min] | Area mAU  | Height [mAU] | Area %  |
|--------|---------------|------|-------------|-----------|--------------|---------|
| 1      | 12.831        | VV   | 0.3434      | 433.65973 | 19.11041     | 49.5675 |
| 2      | 16.060        | VB   | 0.4512      | 441.22787 | 14.92587     | 50.4325 |

Totals : 874.88760 34.03628

Results obtained with enhanced integrator!

=====

\*\*\* End of Report \*\*\*

Instrument 1 9/8/2011 4:49:18 PM ZX

Page 1 of 1

Data File C:\HPCHEM\1\DATA\ZHOU-11\YZ000770.D  
0J-H, H/i-PrOH = 90/10, 1.0 mL/min, 30 oC, 254 nm

Sample Name: DY-4-94D

=====

Injection Date : 9/1/2011 3:32:20 PM  
Sample Name : DY-4-94D Location : Vial 1  
Acq. Operator : ZX  
Acq. Method : C:\HPCHEM\1\METHODS\SW.M  
Last changed : 9/1/2011 3:29:13 PM by ZX  
(modified after loading)  
Analysis Method : C:\HPCHEM\1\METHODS\SW.M  
Last changed : 9/8/2011 4:48:51 PM by ZX  
(modified after loading)

=====

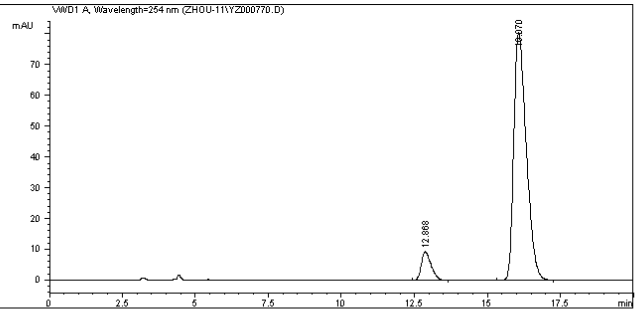

=====

Area Percent Report

=====

Sorted By : Signal  
Multiplier : 1.0000  
Dilution : 1.0000

Signal 1: VWD1 A, Wavelength=254 nm

| Peak # | RetTime [min] | Type | Width [min] | Area mAU   | Height [mAU] | Area %  |
|--------|---------------|------|-------------|------------|--------------|---------|
| 1      | 12.868        | VV   | 0.3406      | 211.77997  | 9.27531      | 8.1506  |
| 2      | 16.070        | VB   | 0.4519      | 2386.56934 | 80.55370     | 91.8494 |

Totals : 2598.34930 89.82900

Results obtained with enhanced integrator!

=====

\*\*\* End of Report \*\*\*

Instrument 1 9/8/2011 4:48:54 PM ZX

Page 1 of 1

Data File C:\CHEM32\1\DATA\ZHOU-10\YZN000945.D  
Sample Name: DY-3-53G+-

=====

Acq. Operator :  
Acq. Instrument : Instrument 1 Location : Vial 1  
Injection Date : 10/28/2010 3:23:55 PM  
Acq. Method : C:\CHEM32\1\METHODS\SW.M  
Last changed : 10/28/2010 3:14:28 PM  
(modified after loading)  
Analysis Method : C:\CHEM32\1\METHODS\SW.M  
Last changed : 9/8/2011 7:44:34 PM  
(modified after loading)  
Sample Info : 0J-H, H/i-PrOH =90/10, 1.0 mL/min, 30 oC, 254NM

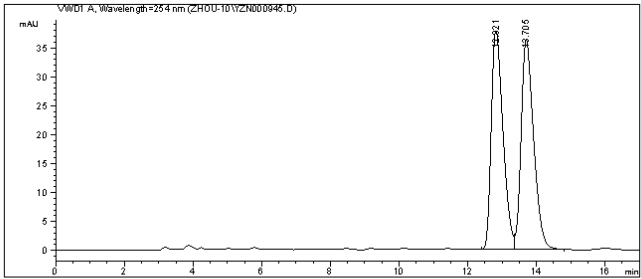

=====

Area Percent Report

=====

Sorted By : Signal  
Multiplier: : 1.0000  
Dilution: : 1.0000  
Use Multiplier & Dilution Factor with ISTDs

Signal 1: VWD1 A, Wavelength=254 nm

| Peak # | RetTime [min] | Type | Width [min] | Area mAU*s | Height [mAU] | Area %  |
|--------|---------------|------|-------------|------------|--------------|---------|
| 1      | 12.821        | BV   | 0.3638      | 897.20624  | 37.87120     | 49.4750 |
| 2      | 13.705        | VB   | 0.3835      | 916.24689  | 36.27848     | 50.5250 |

Totals : 1813.45313 74.14969

=====

\*\*\* End of Report \*\*\*

Data File C:\CHEM32\1\DATA\ZHOU-11\YZN000776.D  
Sample Name: DY-4-100I

=====

Acq. Operator :  
Acq. Instrument : Instrument 1 Location : Vial 1  
Injection Date : 9/6/2011 2:19:43 PM  
Acq. Method : C:\CHEM32\1\METHODS\SW.M  
Last changed : 9/6/2011 1:37:07 PM  
(modified after loading)  
Analysis Method : C:\CHEM32\1\METHODS\SW.M  
Last changed : 9/8/2011 7:50:59 PM  
(modified after loading)  
Sample Info : 0J-H, H/i-PrOH = 90/10, 1.0 mL/min, 30 oC, 254 nm

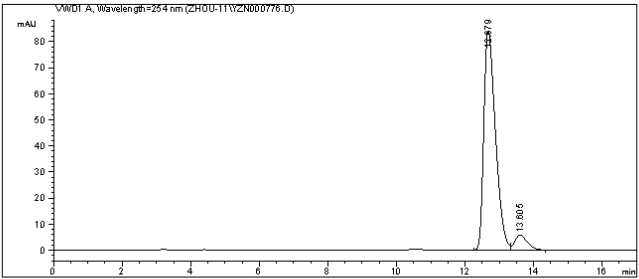

=====

Area Percent Report

=====

Sorted By : Signal  
Multiplier: : 1.0000  
Dilution: : 1.0000  
Use Multiplier & Dilution Factor with ISTDs

Signal 1: VWD1 A, Wavelength=254 nm

| Peak # | RetTime [min] | Type | Width [min] | Area mAU*s | Height [mAU] | Area %  |
|--------|---------------|------|-------------|------------|--------------|---------|
| 1      | 12.679        | BV   | 0.3607      | 1983.00977 | 84.18130     | 93.2101 |
| 2      | 13.605        | VB   | 0.3681      | 144.45268  | 5.85042      | 6.7899  |

Totals : 2127.46245 90.03172

=====

\*\*\* End of Report \*\*\*

Data File C:\CHEM32\1\DATA\ZHOU-10\YZN000943.D  
Sample Name: DY-3-53H+-

=====

|                 |   |                                                 |          |   |        |
|-----------------|---|-------------------------------------------------|----------|---|--------|
| Acq. Operator   | : |                                                 | Location | : | Vial 1 |
| Acq. Instrument | : | Instrument 1                                    |          |   |        |
| Injection Date  | : | 10/28/2010 2:33:27 PM                           |          |   |        |
| Acq. Method     | : | C:\CHEM32\1\METHODS\SW.M                        |          |   |        |
| Last changed    | : | 10/28/2010 2:31:22 PM                           |          |   |        |
|                 |   | (modified after loading)                        |          |   |        |
| Analysis Method | : | C:\CHEM32\1\METHODS\SW.M                        |          |   |        |
| Last changed    | : | 9/8/2011 7:45:19 PM                             |          |   |        |
|                 |   | (modified after loading)                        |          |   |        |
| Sample Info     | : | 0J-H, H/i-PrOH =85/15, 0.8 mL/min, 30 oC, 254NM |          |   |        |

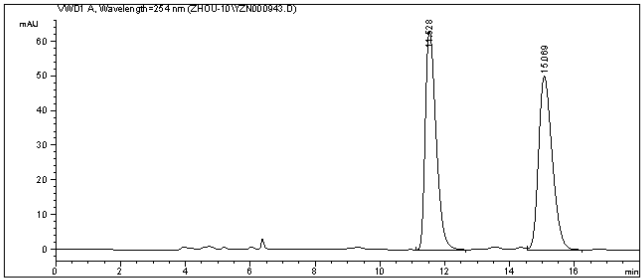

=====

Area Percent Report

=====

Sorted By : Signal

Multiplier: : 1.0000

Dilution: : 1.0000

Use Multiplier & Dilution Factor with ISTDs

Signal 1: VWD1 A, Wavelength=254 nm

| Peak # | RetTime [min] | Type | Width [min] | Area mAU*s | Height [mAU] | Area %  |
|--------|---------------|------|-------------|------------|--------------|---------|
| 1      | 11.528        | VB   | 0.3565      | 1456.97620 | 63.16806     | 49.9453 |
| 2      | 15.069        | VB   | 0.4517      | 1460.16516 | 49.94775     | 50.0547 |

Totals : 2917.14136 113.11581

=====

\*\*\* End of Report \*\*\*

Data File C:\CHEM32\1\DATA\ZHOU-11\YZN000779.D  
Sample Name: DY-4-100J

=====

|                 |   |                                                   |          |   |        |
|-----------------|---|---------------------------------------------------|----------|---|--------|
| Acq. Operator   | : |                                                   | Location | : | Vial 1 |
| Acq. Instrument | : | Instrument 1                                      |          |   |        |
| Injection Date  | : | 9/6/2011 3:43:58 PM                               |          |   |        |
| Acq. Method     | : | C:\CHEM32\1\METHODS\SW.M                          |          |   |        |
| Last changed    | : | 9/6/2011 3:31:05 PM                               |          |   |        |
|                 |   | (modified after loading)                          |          |   |        |
| Analysis Method | : | C:\CHEM32\1\METHODS\SW.M                          |          |   |        |
| Last changed    | : | 9/8/2011 7:52:53 PM                               |          |   |        |
|                 |   | (modified after loading)                          |          |   |        |
| Sample Info     | : | 0J-H, H/i-PrOH = 85/15, 0.8 mL/min, 30 oC, 254 nm |          |   |        |

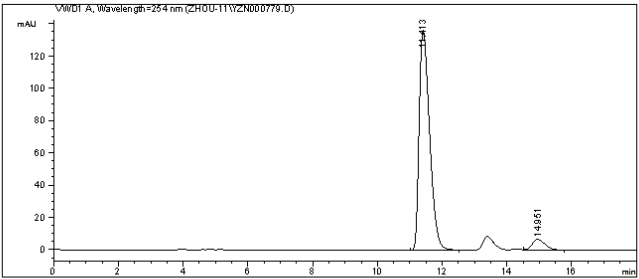

=====

Area Percent Report

=====

Sorted By : Signal

Multiplier: : 1.0000

Dilution: : 1.0000

Use Multiplier & Dilution Factor with ISTDs

Signal 1: VWD1 A, Wavelength=254 nm

| Peak # | RetTime [min] | Type | Width [min] | Area mAU*s | Height [mAU] | Area %  |
|--------|---------------|------|-------------|------------|--------------|---------|
| 1      | 11.413        | BB   | 0.3467      | 3042.41992 | 136.09575    | 94.2657 |
| 2      | 14.951        | VB   | 0.4310      | 185.07315  | 6.58987      | 5.7343  |

Totals : 3227.49307 142.68562

=====

\*\*\* End of Report \*\*\*

Data File C:\CHEM32\1\DATA\ZHOU-10\YZN000940.D  
Sample Name: DY-3-52F+-

=====

|                 |   |                                                |          |   |        |
|-----------------|---|------------------------------------------------|----------|---|--------|
| Acq. Operator   | : |                                                | Location | : | Vial 1 |
| Acq. Instrument | : | Instrument 1                                   |          |   |        |
| Injection Date  | : | 10/27/2010 8:19:34 PM                          |          |   |        |
| Acq. Method     | : | C:\CHEM32\1\METHODS\SW.M                       |          |   |        |
| Last changed    | : | 10/27/2010 8:16:33 PM                          |          |   |        |
|                 |   | (modified after loading)                       |          |   |        |
| Analysis Method | : | C:\CHEM32\1\METHODS\SW.M                       |          |   |        |
| Last changed    | : | 9/8/2011 4:58:08 PM                            |          |   |        |
|                 |   | (modified after loading)                       |          |   |        |
| Sample Info     | : | AD-H, H/i-PrOH =95/5, 0.8 mL/min, 30 oC, 254NM |          |   |        |

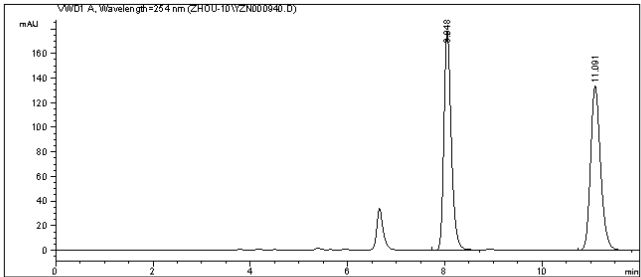

=====

Area Percent Report

=====

Sorted By : Signal

Multiplier: : 1.0000

Dilution: : 1.0000

Use Multiplier & Dilution Factor with ISTDs

Signal 1: VWD1 A, Wavelength=254 nm

| Peak # | RetTime [min] | Type | Width [min] | Area mAU*s | Height [mAU] | Area %  |
|--------|---------------|------|-------------|------------|--------------|---------|
| 1      | 8.048         | BB   | 0.1590      | 1876.72498 | 178.64925    | 49.6593 |
| 2      | 11.091        | BB   | 0.2172      | 1902.47437 | 133.52693    | 50.3407 |

Totals : 3779.19934 312.17618

=====

\*\*\* End of Report \*\*\*

Data File C:\CHEM32\1\DATA\ZHOU-11\YZN000743.D  
Sample Name: DY-4-94E

=====

|                 |   |                                                  |          |   |        |
|-----------------|---|--------------------------------------------------|----------|---|--------|
| Acq. Operator   | : |                                                  | Location | : | Vial 1 |
| Acq. Instrument | : | Instrument 1                                     |          |   |        |
| Injection Date  | : | 8/24/2011 3:23:56 PM                             |          |   |        |
| Acq. Method     | : | C:\CHEM32\1\METHODS\SW.M                         |          |   |        |
| Last changed    | : | 8/24/2011 2:59:14 PM                             |          |   |        |
|                 |   | (modified after loading)                         |          |   |        |
| Analysis Method | : | C:\CHEM32\1\METHODS\SW.M                         |          |   |        |
| Last changed    | : | 9/8/2011 4:56:37 PM                              |          |   |        |
|                 |   | (modified after loading)                         |          |   |        |
| Sample Info     | : | AD-H, H/i-PrOH = 95/5, 0.8 mL/min, 30 oC, 254 nm |          |   |        |

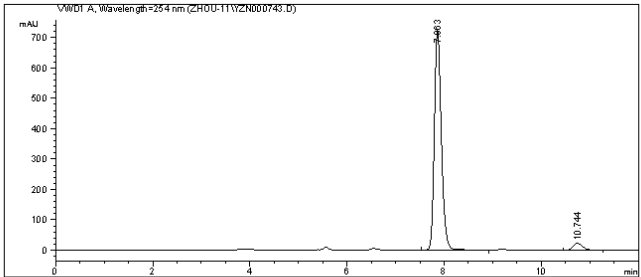

=====

Area Percent Report

=====

Sorted By : Signal

Multiplier: : 1.0000

Dilution: : 1.0000

Use Multiplier & Dilution Factor with ISTDs

Signal 1: VWD1 A, Wavelength=254 nm

| Peak # | RetTime [min] | Type | Width [min] | Area mAU*s | Height [mAU] | Area %  |
|--------|---------------|------|-------------|------------|--------------|---------|
| 1      | 7.863         | VB   | 0.1534      | 7247.13135 | 722.88898    | 95.9286 |
| 2      | 10.744        | VB   | 0.2077      | 307.58405  | 22.68503     | 4.0714  |

Totals : 7554.71539 745.57401

=====

\*\*\* End of Report \*\*\*

Data File C:\HPCHEM\1\DATA\YFZ\C2501113.D  
OD-H, H/i-PrOH = 90/10, 1.0 mL/min, 30 oC, 254 nm

Sample Name: DY-3-80B+-

=====

Injection Date : 12/6/2010 5:01:02 PM  
Sample Name : DY-3-80B+- Location : Vial 1  
Acq. Operator : ZX  
Acq. Method : C:\HPCHEM\1\METHODS\SW.M  
Last changed : 12/6/2010 5:09:45 PM by ZX  
(modified after loading)  
Analysis Method : C:\HPCHEM\1\METHODS\SW.M  
Last changed : 9/8/2011 7:57:42 PM by ZX  
(modified after loading)

=====

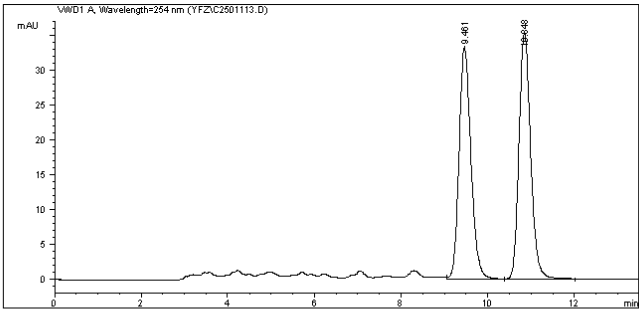

=====

Area Percent Report

=====

Sorted By : Signal  
Multiplier : 1.0000  
Dilution : 1.0000

Signal 1: VWD1 A, Wavelength=254 nm

| Peak # | RetTime [min] | Type | Width [min] | Area mAU  | Height %s | Area [mAU] | Height % |
|--------|---------------|------|-------------|-----------|-----------|------------|----------|
| 1      | 9.461         | VV   | 0.2937      | 635.16913 | 33.33329  | 49.2334    |          |
| 2      | 10.848        | VB   | 0.2857      | 654.94983 | 35.40527  | 50.7666    |          |

Totals : 1290.11896 68.73856

Results obtained with enhanced integrator!

=====

\*\*\* End of Report \*\*\*

Data File C:\CHEM32\1\DATA\ZHOU-11\YZN000741.D  
Sample Name: DY-4-95F

=====

Acq. Operator : Instrument 1  
Acq. Instrument : 8/24/2011 2:21:37 PM Location : Vial 1  
Injection Date : 8/24/2011 2:21:37 PM  
Acq. Method : C:\CHEM32\1\METHODS\SW.M  
Last changed : 8/24/2011 2:17:33 PM  
(modified after loading)  
Analysis Method : C:\CHEM32\1\METHODS\SW.M  
Last changed : 9/8/2011 7:37:08 PM  
(modified after loading)  
Sample Info : OD-H, H/i-PrOH = 90/10, 1.0 mL/min, 30 oC, 254 nm

=====

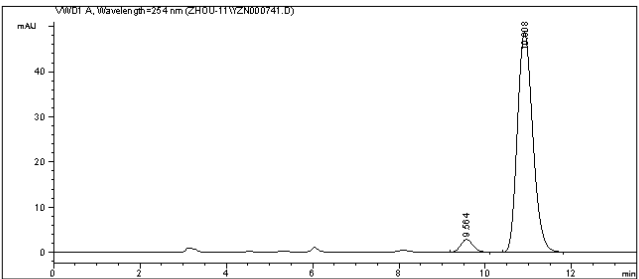

=====

Area Percent Report

=====

Sorted By : Signal  
Multiplier: : 1.0000  
Dilution: : 1.0000  
Use Multiplier & Dilution Factor with ISTDs

Signal 1: VWD1 A, Wavelength=254 nm

| Peak # | RetTime [min] | Type | Width [min] | Area mAU   | Height %s | Area [mAU] | Height % |
|--------|---------------|------|-------------|------------|-----------|------------|----------|
| 1      | 9.564         | BB   | 0.3081      | 56.31651   | 2.82703   | 4.4724     |          |
| 2      | 10.908        | BB   | 0.3873      | 1202.88538 | 48.67994  | 95.5276    |          |

Totals : 1259.20189 51.50697

=====

\*\*\* End of Report \*\*\*

Data File C:\CHEM32\1\DATA\ZHOU-11\YZN000745.D  
Sample Name: DY-4-95G+-

=====

|                 |   |                                                  |          |          |
|-----------------|---|--------------------------------------------------|----------|----------|
| Acq. Operator   | : | Instrument 1                                     | Location | : Vial 1 |
| Acq. Instrument | : | 8/24/2011 4:39:18 PM                             |          |          |
| Injection Date  | : | C:\CHEM32\1\METHODS\SW.M                         |          |          |
| Acq. Method     | : | 8/24/2011 4:36:27 PM                             |          |          |
| Last changed    | : | (modified after loading)                         |          |          |
| Analysis Method | : | C:\CHEM32\1\METHODS\SW.M                         |          |          |
| Last changed    | : | 9/8/2011 7:39:43 PM                              |          |          |
|                 | : | (modified after loading)                         |          |          |
| Sample Info     | : | OD-H, H/i-PrOH = 99/1, 1.0 mL/min, 30 oC, 254 nm |          |          |

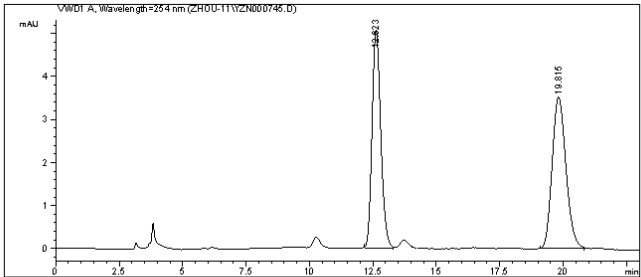

=====

Area Percent Report

=====

Sorted By : Signal

Multiplier: : 1.0000

Dilution: : 1.0000

Use Multiplier & Dilution Factor with ISTDs

Signal 1: VWD1 A, Wavelength=254 nm

| Peak # | RetTime [min] | Type | Width [min] | Area mAU*s | Height [mAU] | Area %  |
|--------|---------------|------|-------------|------------|--------------|---------|
| 1      | 12.623        | BB   | 0.3656      | 120.58823  | 5.05587      | 47.5335 |
| 2      | 19.815        | BB   | 0.5897      | 133.10271  | 3.51989      | 52.4665 |

Totals : 253.69093 8.57575

=====

\*\*\* End of Report \*\*\*

Data File C:\CHEM32\1\DATA\ZHOU-11\YZN000744.D  
Sample Name: DY-4-95G

=====

|                 |   |                                                  |          |          |
|-----------------|---|--------------------------------------------------|----------|----------|
| Acq. Operator   | : | Instrument 1                                     | Location | : Vial 1 |
| Acq. Instrument | : | 8/24/2011 4:09:41 PM                             |          |          |
| Injection Date  | : | C:\CHEM32\1\METHODS\SW.M                         |          |          |
| Acq. Method     | : | 8/24/2011 3:40:54 PM                             |          |          |
| Last changed    | : | (modified after loading)                         |          |          |
| Analysis Method | : | C:\CHEM32\1\METHODS\SW.M                         |          |          |
| Last changed    | : | 9/8/2011 7:38:37 PM                              |          |          |
|                 | : | (modified after loading)                         |          |          |
| Sample Info     | : | OD-H, H/i-PrOH = 99/1, 1.0 mL/min, 30 oC, 254 nm |          |          |

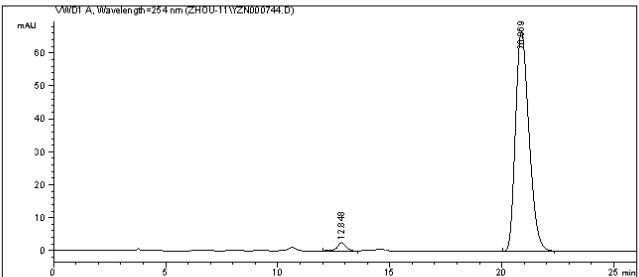

=====

Area Percent Report

=====

Sorted By : Signal

Multiplier: : 1.0000

Dilution: : 1.0000

Use Multiplier & Dilution Factor with ISTDs

Signal 1: VWD1 A, Wavelength=254 nm

| Peak # | RetTime [min] | Type | Width [min] | Area mAU*s | Height [mAU] | Area %  |
|--------|---------------|------|-------------|------------|--------------|---------|
| 1      | 12.848        | BB   | 0.4184      | 70.34047   | 2.52366      | 2.4553  |
| 2      | 20.869        | BB   | 0.6486      | 2794.52539 | 66.54762     | 97.5447 |

Totals : 2864.86586 69.07127

=====

\*\*\* End of Report \*\*\*

Data File C:\HPCHEM\1\DATA\ZHOU-11\YZ000807.D  
OD-H, H/i-PrOH = 99/1, 1.0 mL/min, 30 oC, 254 nm

Sample Name: DY-4-101N+-

=====

Injection Date : 9/6/2011 3:31:54 PM  
Sample Name : DY-4-101N+- Location : Vial 1  
Acq. Operator : ZX  
Acq. Method : C:\HPCHEM\1\METHODS\SW.M  
Last changed : 9/6/2011 3:39:32 PM by ZX  
(modified after loading)  
Analysis Method : C:\HPCHEM\1\METHODS\SW.M  
Last changed : 9/8/2011 4:28:02 PM by ZX  
(modified after loading)

=====

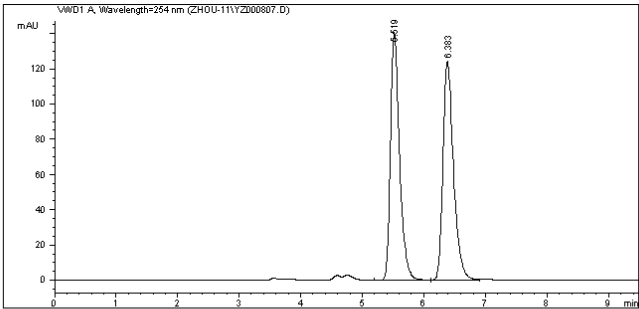

=====

Area Percent Report

=====

Sorted By : Signal  
Multiplier : 1.0000  
Dilution : 1.0000

Signal 1: VWD1 A, Wavelength=254 nm

| Peak # | RetTime [min] | Type | Width [min] | Area mAU*s | Height [mAU] | Area %  |
|--------|---------------|------|-------------|------------|--------------|---------|
| 1      | 5.519         | VV   | 0.1569      | 1453.65698 | 140.75349    | 49.6938 |
| 2      | 6.383         | VV   | 0.1792      | 1471.56946 | 124.01060    | 50.3062 |

Totals : 2925.22644 264.76410

Results obtained with enhanced integrator!

=====

\*\*\* End of Report \*\*\*

Data File C:\HPCHEM\1\DATA\ZHOU-11\YZ000806.D  
OD-H, H/i-PrOH = 99/1, 1.0 mL/min, 30 oC, 254 nm

Sample Name: DY-4-101N

=====

Injection Date : 9/6/2011 3:18:09 PM  
Sample Name : DY-4-101N Location : Vial 1  
Acq. Operator : ZX  
Acq. Method : C:\HPCHEM\1\METHODS\SW.M  
Last changed : 9/6/2011 3:23:06 PM by ZX  
(modified after loading)  
Analysis Method : C:\HPCHEM\1\METHODS\SW.M  
Last changed : 9/8/2011 4:28:28 PM by ZX  
(modified after loading)

=====

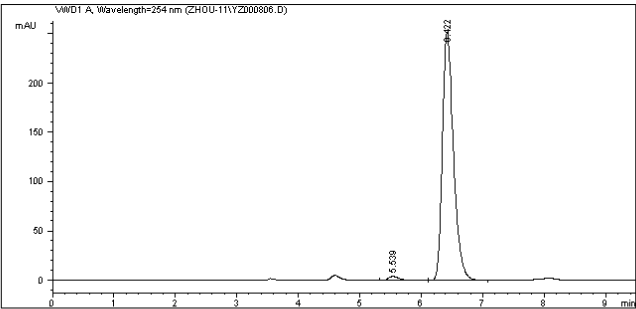

=====

Area Percent Report

=====

Sorted By : Signal  
Multiplier : 1.0000  
Dilution : 1.0000

Signal 1: VWD1 A, Wavelength=254 nm

| Peak # | RetTime [min] | Type | Width [min] | Area mAU*s | Height [mAU] | Area %  |
|--------|---------------|------|-------------|------------|--------------|---------|
| 1      | 5.539         | VB   | 0.1742      | 49.18963   | 4.16559      | 1.5626  |
| 2      | 6.422         | BV   | 0.1875      | 3098.78125 | 251.33672    | 98.4374 |

Totals : 3147.97088 255.50230

Results obtained with enhanced integrator!

=====

\*\*\* End of Report \*\*\*

Data File C:\HPCHEM\1\DATA\ZHOU-11\YZ000824.D  
0J-H, H/i-PrOH = 90/10, 1.0 mL/min, 30 oC, 254 nm

Sample Name: DY-4-101M+-

=====

Injection Date : 9/8/2011 11:24:37 AM  
Sample Name : DY-4-101M+- Location : Vial 1  
Acq. Operator : ZX  
Acq. Method : C:\HPCHEM\1\METHODS\SW.M  
Last changed : 9/8/2011 11:32:09 AM by ZX  
(modified after loading)  
Analysis Method : C:\HPCHEM\1\METHODS\SW.M  
Last changed : 9/8/2011 4:24:52 PM by ZX  
(modified after loading)

=====

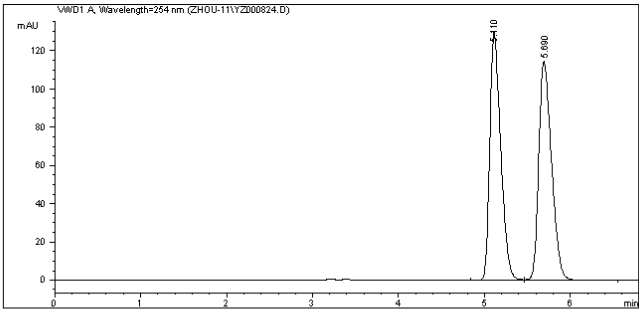

=====

Area Percent Report

=====

Sorted By : Signal  
Multiplier : 1.0000  
Dilution : 1.0000

Signal 1: VWD1 A, Wavelength=254 nm

| Peak # | RetTime [min] | Type | Width [min] | Area mAU   | Height [mAU] | Area %  |
|--------|---------------|------|-------------|------------|--------------|---------|
| 1      | 5.110         | VV   | 0.1370      | 1166.53760 | 129.68788    | 50.0366 |
| 2      | 5.690         | VV   | 0.1553      | 1164.82874 | 114.33876    | 49.9634 |

Totals : 2331.36633 244.02664

Results obtained with enhanced integrator!

=====

\*\*\* End of Report \*\*\*

Data File C:\HPCHEM\1\DATA\ZHOU-11\YZ000823.D  
0J-H, H/i-PrOH = 90/10, 1.0 mL/min, 30 oC, 254 nm

Sample Name: DY-4-101M

=====

Injection Date : 9/8/2011 11:16:13 AM  
Sample Name : DY-4-101M Location : Vial 1  
Acq. Operator : ZX  
Acq. Method : C:\HPCHEM\1\METHODS\SW.M  
Last changed : 9/8/2011 11:17:11 AM by ZX  
(modified after loading)  
Analysis Method : C:\HPCHEM\1\METHODS\SW.M  
Last changed : 9/8/2011 4:24:27 PM by ZX  
(modified after loading)

=====

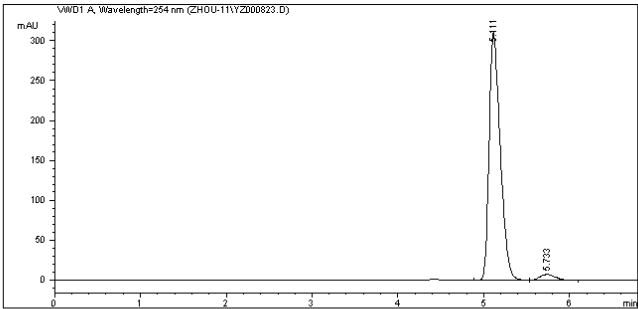

=====

Area Percent Report

=====

Sorted By : Signal  
Multiplier : 1.0000  
Dilution : 1.0000

Signal 1: VWD1 A, Wavelength=254 nm

| Peak # | RetTime [min] | Type | Width [min] | Area mAU   | Height [mAU] | Area %  |
|--------|---------------|------|-------------|------------|--------------|---------|
| 1      | 5.111         | VV   | 0.1400      | 2834.85303 | 310.47525    | 96.9477 |
| 2      | 5.733         | VV   | 0.2033      | 89.25226   | 6.83440      | 3.0523  |

Totals : 2924.10529 317.30965

Results obtained with enhanced integrator!

=====

\*\*\* End of Report \*\*\*

Data File C:\HPCHEM\1\DATA\ZHOU-11\YZ000810.D  
OD-H, H/i-PrOH = 99/1, 1.0 mL/min, 30 oC, 254 nm

Sample Name: DY-4-101L+-

=====

Injection Date : 9/6/2011 4:20:58 PM  
Sample Name : DY-4-101L+- Location : Vial 1  
Acq. Operator : ZX  
Acq. Method : C:\HPCHEM\1\METHODS\SW.M  
Last changed : 9/6/2011 4:18:39 PM by ZX  
(modified after loading)  
Analysis Method : C:\HPCHEM\1\METHODS\SW.M  
Last changed : 9/8/2011 4:30:11 PM by ZX  
(modified after loading)

=====

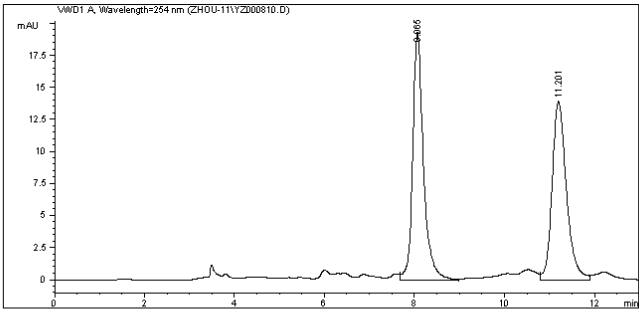

=====

Area Percent Report

=====

Sorted By : Signal  
Multiplier : 1.0000  
Dilution : 1.0000

Signal 1: VWD1 A, Wavelength=254 nm

| Peak # | RetTime [min] | Type | Width [min] | Area mAU*s | Height [mAU] | Area %  |
|--------|---------------|------|-------------|------------|--------------|---------|
| 1      | 8.065         | VB   | 0.2451      | 318.89032  | 19.31021     | 50.8424 |
| 2      | 11.201        | VV   | 0.3357      | 308.32336  | 13.91516     | 49.1576 |

Totals : 627.21368 33.22537

Results obtained with enhanced integrator!

=====

\*\*\* End of Report \*\*\*

Data File C:\HPCHEM\1\DATA\ZHOU-11\YZ000811.D  
OD-H, H/i-PrOH = 99/1, 1.0 mL/min, 30 oC, 254 nm

Sample Name: DY-4-101L

=====

Injection Date : 9/6/2011 4:39:55 PM  
Sample Name : DY-4-101L Location : Vial 1  
Acq. Operator : ZX  
Acq. Method : C:\HPCHEM\1\METHODS\SW.M  
Last changed : 9/6/2011 4:37:25 PM by ZX  
(modified after loading)  
Analysis Method : C:\HPCHEM\1\METHODS\SW.M  
Last changed : 9/8/2011 4:30:42 PM by ZX  
(modified after loading)

=====

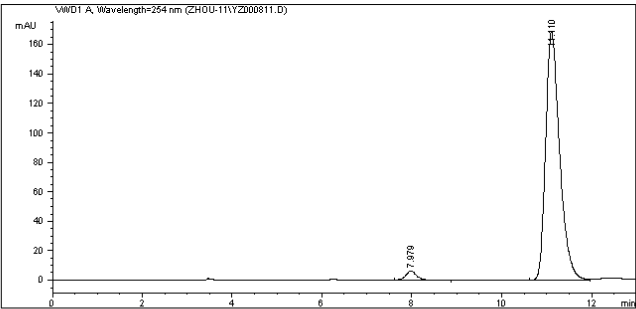

=====

Area Percent Report

=====

Sorted By : Signal  
Multiplier : 1.0000  
Dilution : 1.0000

Signal 1: VWD1 A, Wavelength=254 nm

| Peak # | RetTime [min] | Type | Width [min] | Area mAU*s | Height [mAU] | Area %  |
|--------|---------------|------|-------------|------------|--------------|---------|
| 1      | 7.979         | VB   | 0.2511      | 104.89999  | 6.20470      | 2.7867  |
| 2      | 11.110        | VV   | 0.3323      | 3659.35620 | 168.27345    | 97.2133 |

Totals : 3764.25619 174.47815

Results obtained with enhanced integrator!

=====

\*\*\* End of Report \*\*\*

Data File C:\HPCHEM\1\DATA\ZHOU-11\YZ000819.D  
OD-H, H/i-PrOH = 99/1, 1.0 mL/min, 30 oC, 254 nm

Sample Name: DY-4-101K+-

=====

Injection Date : 9/8/2011 10:02:59 AM  
Sample Name : DY-4-101K+- Location : Vial 1  
Acq. Operator : ZX  
Acq. Method : C:\HPCHEM\1\METHODS\SW.M  
Last changed : 9/8/2011 9:37:57 AM by ZX  
(modified after loading)  
Analysis Method : C:\HPCHEM\1\METHODS\SW.M  
Last changed : 9/8/2011 4:32:13 PM by ZX  
(modified after loading)

=====

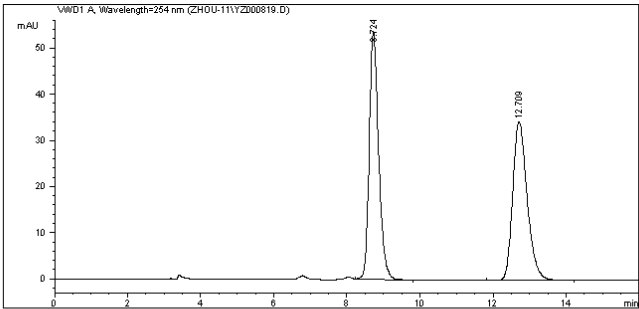

=====

Area Percent Report

Sorted By : Signal  
Multiplier : 1.0000  
Dilution : 1.0000

Signal 1: VWD1 A, Wavelength=254 nm

| Peak # | RetTime [min] | Type | Width [min] | Area mAU*s | Height [mAU] | Area %  |
|--------|---------------|------|-------------|------------|--------------|---------|
| 1      | 8.724         | VB   | 0.2746      | 959.14655  | 53.51875     | 50.5357 |
| 2      | 12.709        | BB   | 0.4233      | 938.81134  | 34.23988     | 49.4643 |

Totals : 1897.95789 87.75863

Results obtained with enhanced integrator!

\*\*\* End of Report \*\*\*

Data File C:\HPCHEM\1\DATA\ZHOU-11\YZ000803.D  
OD-H, H/i-PrOH = 99/1, 1.0 mL/min, 30 oC, 254 nm

Sample Name: DY-4-101K

=====

Injection Date : 9/6/2011 2:23:46 PM  
Sample Name : DY-4-101K Location : Vial 1  
Acq. Operator : ZX  
Acq. Method : C:\HPCHEM\1\METHODS\SW.M  
Last changed : 9/6/2011 1:37:48 PM by ZX  
(modified after loading)  
Analysis Method : C:\HPCHEM\1\METHODS\SW.M  
Last changed : 9/8/2011 4:32:54 PM by ZX  
(modified after loading)

=====

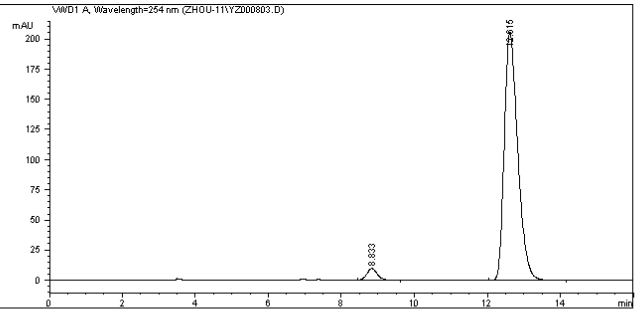

=====

Area Percent Report

Sorted By : Signal  
Multiplier : 1.0000  
Dilution : 1.0000

Signal 1: VWD1 A, Wavelength=254 nm

| Peak # | RetTime [min] | Type | Width [min] | Area mAU*s | Height [mAU] | Area %  |
|--------|---------------|------|-------------|------------|--------------|---------|
| 1      | 8.833         | VB   | 0.3050      | 188.91023  | 9.49144      | 3.4772  |
| 2      | 12.615        | VB   | 0.3923      | 5243.91504 | 205.54976    | 96.5228 |

Totals : 5432.82527 215.04120

Results obtained with enhanced integrator!

\*\*\* End of Report \*\*\*

Data File C:\CHEM32\1\DATA\ZHOU-10\YZN000975.D  
Sample Name: DY-3-550+-

=====

|                 |   |                                                  |          |   |        |
|-----------------|---|--------------------------------------------------|----------|---|--------|
| Acq. Operator   | : |                                                  | Location | : | Vial 1 |
| Acq. Instrument | : | Instrument 1                                     |          |   |        |
| Injection Date  | : | 11/7/2010 3:02:59 PM                             |          |   |        |
| Acq. Method     | : | C:\CHEM32\1\METHODS\SW.M                         |          |   |        |
| Last changed    | : | 11/7/2010 3:01:05 PM                             |          |   |        |
|                 |   | (modified after loading)                         |          |   |        |
| Analysis Method | : | C:\CHEM32\1\METHODS\SW.M                         |          |   |        |
| Last changed    | : | 9/8/2011 7:41:56 PM                              |          |   |        |
|                 |   | (modified after loading)                         |          |   |        |
| Sample Info     | : | 0J-H, H/i-PrOH =90/10, 1.0 mL/min, 30 oC, 254 NM |          |   |        |

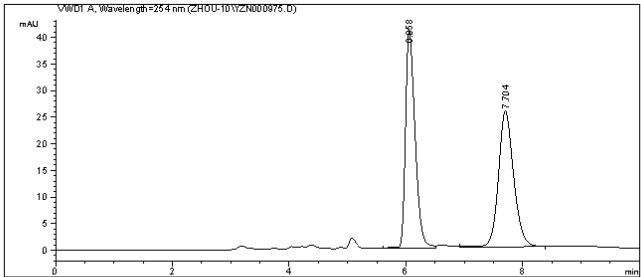

=====

Area Percent Report

=====

Sorted By : Signal

Multiplier: : 1.0000

Dilution: : 1.0000

Use Multiplier & Dilution Factor with ISTDs

Signal 1: VWD1 A, Wavelength=254 nm

| Peak # | RetTime [min] | Type | Width [min] | Area mAU  | Height [mAU] | Area %  |
|--------|---------------|------|-------------|-----------|--------------|---------|
| 1      | 6.058         | VV   | 0.1746      | 463.79630 | 40.89103     | 50.1101 |
| 2      | 7.704         | VB   | 0.2738      | 461.75873 | 25.50555     | 49.8899 |

Totals : 925.55502 66.39658

=====

\*\*\* End of Report \*\*\*

Data File C:\HPCHEM\1\DATA\ZHOU-11\YZ000708.D  
0J-H, H/i-PrOH = 90/10, 1.0 mL/min, 30 oC, 254 nm

Sample Name: DY-4-95H

=====

|                 |   |                            |          |   |        |
|-----------------|---|----------------------------|----------|---|--------|
| Injection Date  | : | 8/24/2011 3:35:12 PM       | Location | : | Vial 1 |
| Sample Name     | : | DY-4-95H                   |          |   |        |
| Acq. Operator   | : | ZX                         |          |   |        |
| Acq. Method     | : | C:\HPCHEM\1\METHODS\SW.M   |          |   |        |
| Last changed    | : | 8/24/2011 3:35:26 PM by ZX |          |   |        |
|                 |   | (modified after loading)   |          |   |        |
| Analysis Method | : | C:\HPCHEM\1\METHODS\SW.M   |          |   |        |
| Last changed    | : | 9/8/2011 5:04:08 PM by ZX  |          |   |        |
|                 |   | (modified after loading)   |          |   |        |

=====

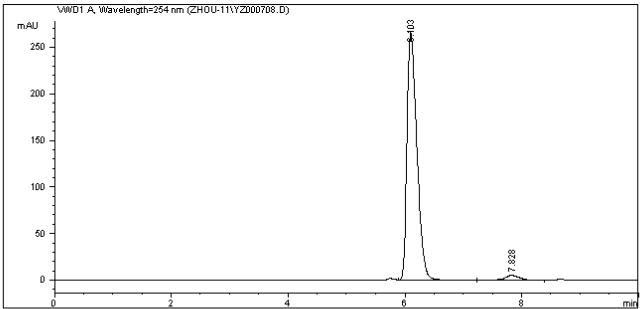

=====

Area Percent Report

=====

Sorted By : Signal

Multiplier: : 1.0000

Dilution: : 1.0000

Signal 1: VWD1 A, Wavelength=254 nm

| Peak # | RetTime [min] | Type | Width [min] | Area mAU   | Height [mAU] | Area %  |
|--------|---------------|------|-------------|------------|--------------|---------|
| 1      | 6.103         | VV   | 0.1808      | 3128.85010 | 266.14951    | 97.1678 |
| 2      | 7.828         | VB   | 0.2593      | 91.19790   | 5.21544      | 2.8322  |

Totals : 3220.04800 271.36495

Results obtained with enhanced integrator!

=====

\*\*\* End of Report \*\*\*
